# Supplementary material for: Transition-metal-free glycosyl sulfonation of diaryliodonium salts with sodium glycosyl sulfinate: an efficient approach to access glycosyl aryl sulfones
Source: Royal Society of Chemistry journal article supplement (doi:10.1039/d3nj05942a), 2024-01-01
Supplement: d3nj05942a1.pdf [file d3nj05942a1.pdf]

## Content

|                                                                              |    |
|------------------------------------------------------------------------------|----|
| General information.....                                                     | 2  |
| General procedure for optimization (Procedure A) (see Table S1 to S5).....   | 3  |
| General procedure for synthesis of glycosyl aryl sulfone (Procedure B) ..... | 6  |
| General procedure for protected group removal (Procedure C) .....            | 6  |
| Preliminary mechanistic studies .....                                        | 6  |
| Library of sodium glycosyl sulfinates .....                                  | 10 |
| Library of diaryliodonium salts .....                                        | 17 |
| DFT calculations.....                                                        | 20 |
| References.....                                                              | 32 |
| Characterization data .....                                                  | 35 |
| NMR spectra.....                                                             | 49 |

## General information

Unless otherwise stated, all reactions were set up under inert atmosphere (N<sub>2</sub>) utilizing glassware that were oven dried and cooled under nitrogen atmosphere. Silica Gel Flash Column Chromatography was performed on silica gel (particle size 300-400 mesh). Starting materials were purchased directly from commercial suppliers (Sigma Aldrich, Energy Chemical, Bidepharm, Tansoole) and used without further purifications unless otherwise stated. All solvents were dried according to standard procedures or brought from commercial suppliers. Reactions were monitored using thin-layer chromatography (TLC) with F254 indicator. Visualization of the developed plates was performed under UV light (254 nm) or H<sub>2</sub>SO<sub>4</sub>-EtOH (10% H<sub>2</sub>SO<sub>4</sub> v/v).

<sup>1</sup>H NMR, <sup>19</sup>F NMR, <sup>13</sup>C NMR and 2D-NMR spectra were recorded using Bruker AVIII 400 and JEOL JNM-ECA600 spectrometer. <sup>1</sup>H NMR and <sup>13</sup>C NMR chemical shifts were reported in parts per million (ppm) downfield from tetramethylsilane. Coupling constants (*J*) are reported in Hertz (Hz). The residual solvent peak was used as an internal reference: <sup>1</sup>H NMR (CDCl<sub>3</sub> δ 7.26 ppm), <sup>13</sup>C NMR (CDCl<sub>3</sub> δ 77.16 ppm), <sup>1</sup>H NMR (DMSO-*d*<sub>6</sub> δ 2.50 ppm), <sup>13</sup>C NMR (DMSO-*d*<sub>6</sub> δ 39.50 ppm), <sup>1</sup>H NMR (CD<sub>3</sub>OD δ 4.87 ppm), <sup>13</sup>C NMR (CD<sub>3</sub>OD δ 49.00 ppm). The following abbreviations were used to explain the multiplicities: s = singlet, d = doublet, t = triplet, q = quartet, m = multiplet, br = broad. IR spectra were recorded using Nicolet iS50 spectrometer. HRMS data was recorded using HRMS Exactive Plus instrument. Melting point was measured using SGW X-4A instrument. Optical rotation was measured using MCP 150 instrument.

## General procedure for optimization (Procedure A) (see Table S1 to S5)

In a glove box filled with nitrogen, to an oven-dried 5 mL tube equipped with a stirring bar were added sodium glycosyl sulfinate **5a** (0.03 mmol, 1.0 equiv.), diaryliodonium salt **6a** (0.033 mmol, 1.1 equiv.) and solvent (0.3 mL). The tube was sealed with a Teflon screw cap and the mixture was stirred at an indicated temperature. Upon completion, the yield was determined by  $^{19}\text{F}$  NMR spectroscopy with  $\text{PhOCF}_3$  as an internal standard.

**Table S1: Solvent screening**

| Entry | Solvent                | Yield of <b>7a</b> <sup>a</sup> |
|-------|------------------------|---------------------------------|
| 1     | DMF                    | 48%                             |
| 2     | DMSO                   | 92%                             |
| 3     | $\text{CH}_3\text{CN}$ | 38%                             |
| 4     | THF                    | 44%                             |
| 5     | 1,4-dioxane            | 51%                             |
| 6     | DCM                    | 81%                             |
| 7     | DCE                    | 67%                             |
| 8     | EtOAc                  | 40%                             |
| 9     | toluene                | 64%                             |
| 10    | pyridine               | 33%                             |
| 11    | $\text{CHCl}_3$        | 75%                             |

<sup>a</sup>Reaction conditions: **5a** (0.03 mmol, 1.0 equiv.), **6a** (1.1 equiv.), solvent (0.3 mL) under  $\text{N}_2$  atmosphere,  $90^\circ\text{C}$  for 10 h. The yield was determined by  $^{19}\text{F}$  NMR spectroscopy with  $\text{PhOCF}_3$  as an internal standard.

**Table S2: Investigation of temperature**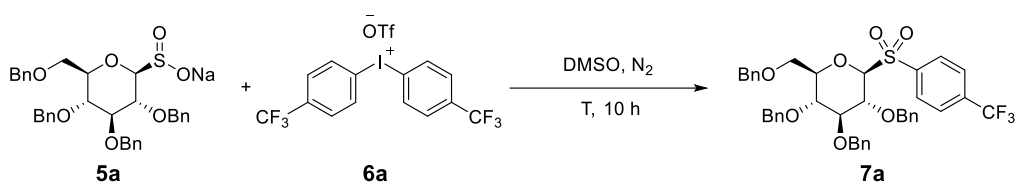

| Entry | T / °C | Yield of <b>7a</b> <sup>a</sup> |
|-------|--------|---------------------------------|
| 1     | 30     | 58%                             |
| 2     | 60     | 95%                             |
| 3     | 90     | 92%                             |
| 4     | 130    | 54%                             |

<sup>a</sup>Reaction conditions: **5a** (0.03 mmol, 1.0 equiv.), **6a** (1.1 equiv.), DMSO (0.3 mL) under N<sub>2</sub> atmosphere, 10 h. The yield was determined by <sup>19</sup>F NMR spectroscopy with PhOCF<sub>3</sub> as an internal standard.

**Table S3: Effect of counter anion**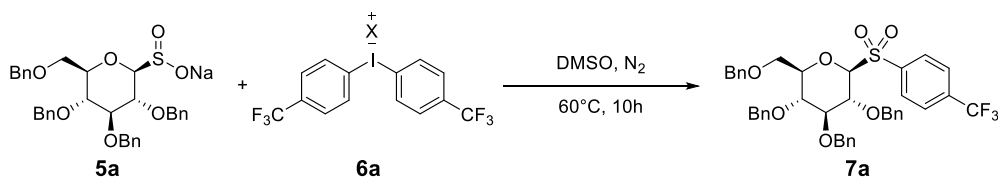

| Entry | X <sup>-</sup>               | Yield of <b>7a</b> <sup>a</sup> |
|-------|------------------------------|---------------------------------|
| 1     | <sup>-</sup> OTf             | 95%                             |
| 2     | <sup>-</sup> BF <sub>4</sub> | 57%                             |

<sup>a</sup>Reaction conditions: **5a** (0.03 mmol, 1.0 equiv.), **6a** (1.1 equiv.), DMSO (0.3 mL) under N<sub>2</sub> atmosphere, 60°C for 10 h. The yield was determined by <sup>19</sup>F NMR spectroscopy with PhOCF<sub>3</sub> as an internal standard.

**Table S4: Investigation of reaction time**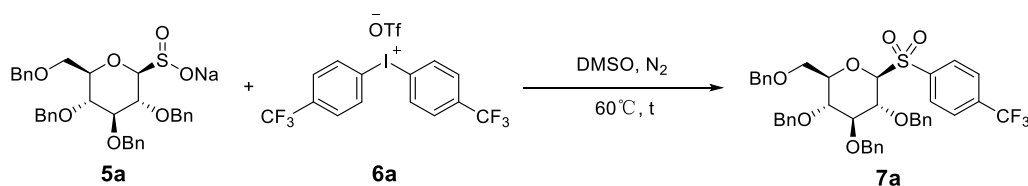

| Entry | t / h | Yield of <b>7a</b> <sup>a</sup> |
|-------|-------|---------------------------------|
| 1     | 6     | 44%                             |
| 2     | 8     | 90%                             |
| 3     | 10    | 95%                             |
| 4     | 12    | 94%                             |
| 5     | 14    | 94%                             |

<sup>a</sup>Reaction conditions: **5a** (0.03 mmol, 1.0 equiv.), **6a** (1.1 equiv.), DMSO (0.3 mL) under N<sub>2</sub> atmosphere, 60°C. The yield was determined by <sup>19</sup>F NMR spectroscopy with PhOCF<sub>3</sub> as an internal standard.

**Table S5: Investigation of reaction atmosphere**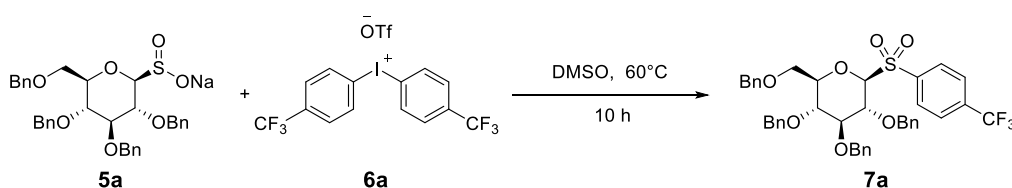

| Entry | environment    | Yield of <b>7a</b> <sup>a</sup> |
|-------|----------------|---------------------------------|
| 1     | N <sub>2</sub> | 95%                             |
| 2     | air            | 37%                             |

<sup>a</sup>Reaction conditions: **5a** (0.03 mmol, 1.0 equiv.), **6a** (1.1 equiv.), DMSO (0.3 mL), 60°C for 10 h. The yield was determined by <sup>19</sup>F NMR spectroscopy with PhOCF<sub>3</sub> as an internal standard.

## General procedure for synthesis of glycosyl aryl sulfone (Procedure B)

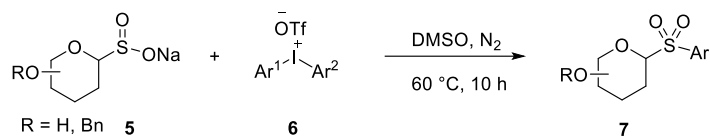

In a glove box filled with nitrogen, to an oven-dried 5 mL tube equipped with a stirring bar were added sodium glycosyl sulfinate **5** (0.10 mmol, 1.0 equiv.), diaryliodonium salt **6** (0.11 mmol, 1.1 equiv.) and DMSO (1 mL). The tube was sealed with a Teflon screw cap and the mixture was stirred at 60°C for 10 h. Upon completion, the crude mixture was diluted with H<sub>2</sub>O (15 mL) and CH<sub>2</sub>Cl<sub>2</sub> (15 mL). The organic phase was separated and dried with anhydrous Na<sub>2</sub>SO<sub>4</sub>. The solvent was removed under reduced pressure using a rotary evaporator. The resulting residue was purified by column chromatography on silica gel with petroleum ether/ethyl acetate as eluent to give the targeted product.

**Note:** For benzylated sodium sulfinate as the substrate and H<sub>2</sub>O as solvent, the reaction temperature is 120 °C and the reaction time is 10 hours. For the unprotected sodium sulfinate as the substrate and CH<sub>3</sub>CN as solvent, the reaction temperature is 90 °C and the reaction time is 24 hours.

## General procedure for protected group removal (Procedure C)

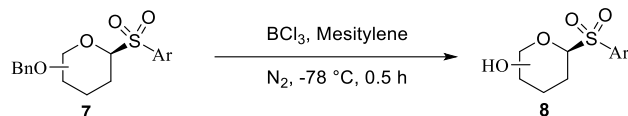

Under N<sub>2</sub>, **7** (1.0 equiv.), CH<sub>2</sub>Cl<sub>2</sub> (0.1 M), and mesitylene (12.0 equiv.) were successively added into an oven-dried glassware. The mixture was cooled to -78 °C and BCl<sub>3</sub> (8.0 equiv., 1.0 M in CH<sub>2</sub>Cl<sub>2</sub>) was added dropwise over 5 min. The resulting solution was stirred at -78 °C for 45 min until completion. The reaction was quenched by dropwise addition of MeOH (2.0 mL) at -78 °C and allowed to stir for an additional 20 min. The resulting mixture was concentrated and directly purified by column chromatography on SiO<sub>2</sub> (CH<sub>2</sub>Cl<sub>2</sub>:MeOH, 10:1) to afford **8**.

## Preliminary mechanistic studies

### Procedure for radical trapping experiments (see Table S6, Figure S1-2)

In a glove box filled with nitrogen, to an oven-dried 5 mL tube equipped with a stirring bar were added sodium glycosyl sulfinate **5** (0.10 mmol, 1.0 equiv.), diaryliodonium salt **6** (0.11 mmol, 1.1 equiv.), radical scavenger and DMSO (1 mL). The tube was sealed with a Teflon screw cap and the solution was stirred at 60°C for 10 h. The yield was determined by <sup>19</sup>F NMR spectroscopy with PhOCF<sub>3</sub> (10 μL, 0.0756 mmol) as an internal standard.

**Table S6: Radical trapping experiment**

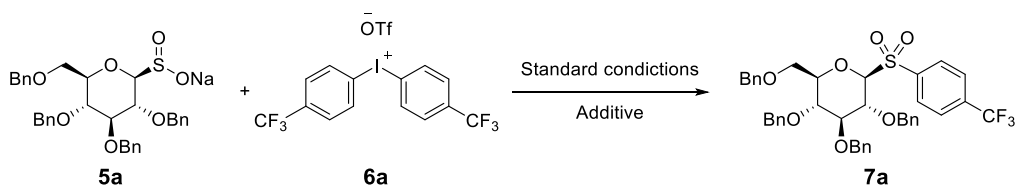

| Entry | Additive                          | Yield of 7a <sup>a</sup> |
|-------|-----------------------------------|--------------------------|
| 1     | none                              | 99%                      |
| 2     | TEMPO (1.0 equiv.)                | 76%                      |
| 3     | 1,1-diphenylethylene (1.0 equiv.) | 100%                     |

<sup>a</sup>The yield was determined by <sup>19</sup>F NMR spectroscopy with PhOCF<sub>3</sub> as an internal standard.

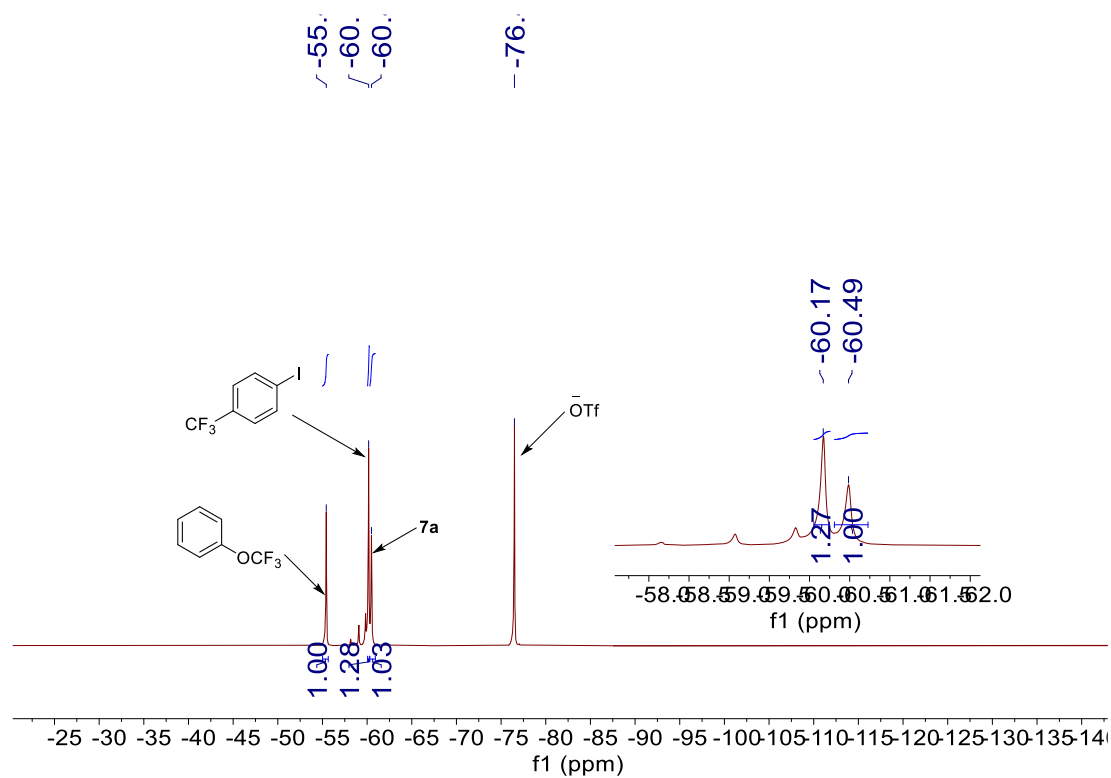

**Figure S1. <sup>19</sup>F NMR spectra for the crude mixture with 1.0 equiv. TEMPO**

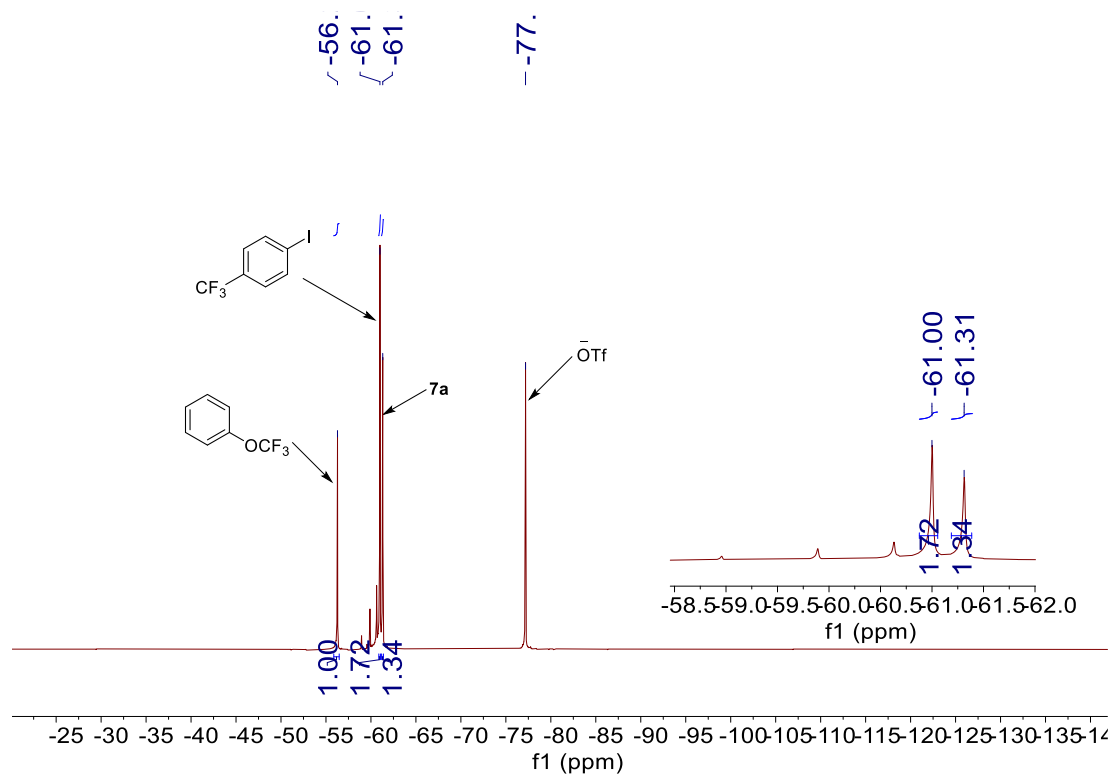

**Figure S2.**  $^{19}\text{F}$  NMR spectra for the crude mixture with 1.0 equiv. 1,1-diphenylethylene

### Reaction with the additive furan (see Figure S3)

In a glove box filled with nitrogen, to an oven-dried 5 mL tube equipped with a stir bar were added sodium glycosyl sulfinate **5a** (0.10 mmol, 1.0 equiv.), diaryliodonium salt **6a** (0.11 mmol, 1.1 equiv.), furan (0.1 mmol, 1.0 equiv.) and DMSO (1 mL). The tube was sealed with a Teflon screw cap and the solution was stirred at 60 °C for 10 h. The yield was determined by  $^{19}\text{F}$  NMR spectroscopy with  $\text{PhOCF}_3$  (10  $\mu\text{L}$ , 0.0756 mmol) as an internal standard.

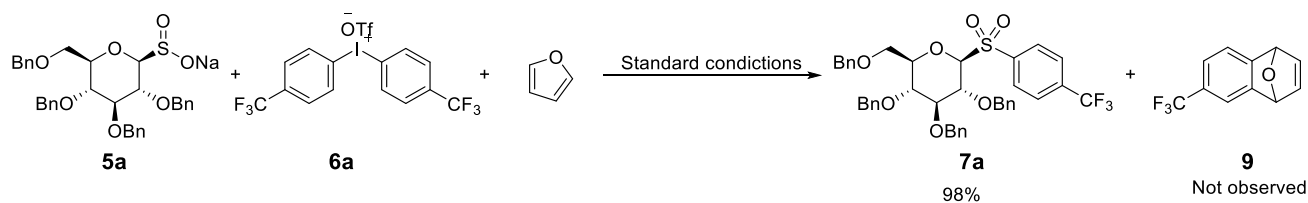



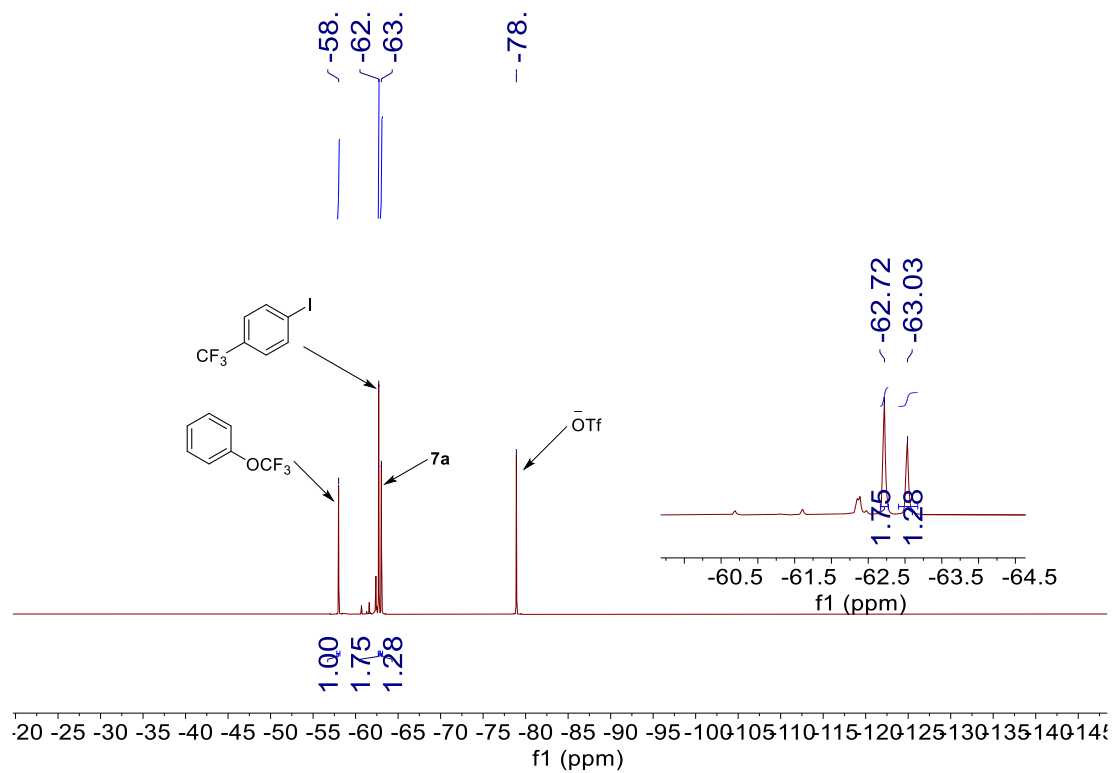

**Figure S3.  $^{19}\text{F}$  NMR spectra for the crude mixture with 1.0 equiv. furan**

## Library of sodium glycosyl sulfinates

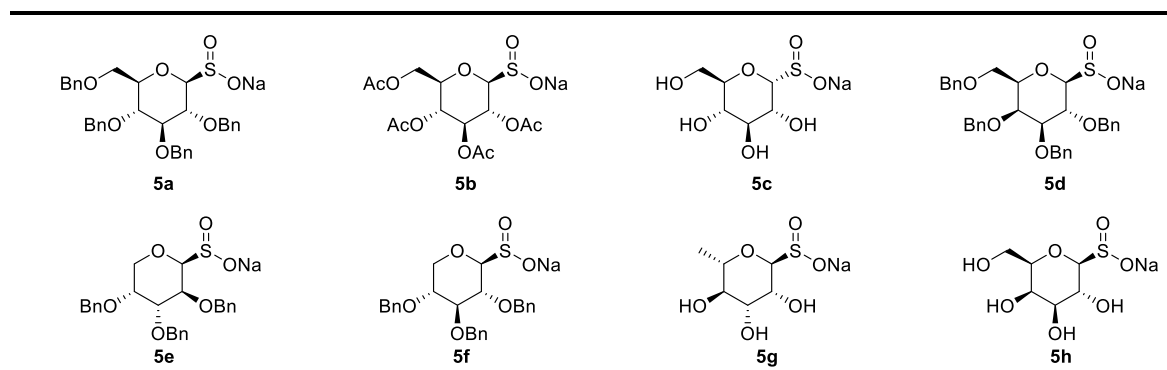

Figure S4. Library of sodium glycosyl sulfinates

### General procedure for preparation of 5a-b, 5d-f (Procedure D)

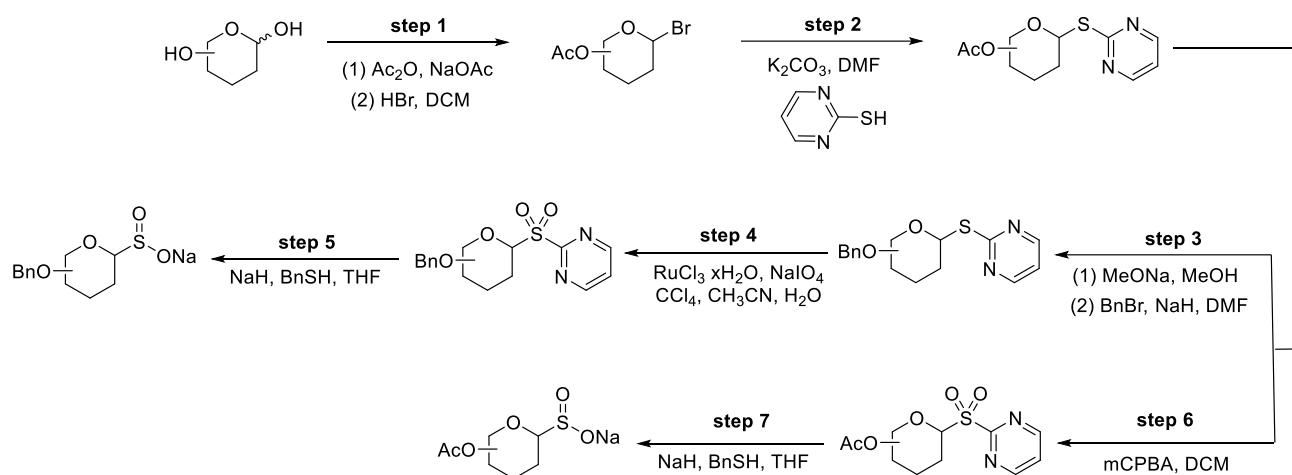

#### Step 1: synthesis of glycosyl bromide

Sugar substrate (1.0 equiv.) and sodium acetate (1.1 equiv.) were added to acetic anhydride (0.6 M). The reaction mixture was heated to 90 °C and stirred for 5 hours. Then the mixture was poured into cold water. The water layer was extracted with CH<sub>2</sub>Cl<sub>2</sub> (3 times). The combined organic layers were washed with saturated NaHCO<sub>3</sub>, dried over Na<sub>2</sub>SO<sub>4</sub>, and concentrated under reduced pressure. The residue was obtained and used directly without further purification.

Crude acetylated glycoside was dissolved in CH<sub>2</sub>Cl<sub>2</sub> (0.5 M) at 0 °C. Then, HBr (30% acetic acid solution, 4.5 equiv.) was slowly added and the resulting mixture was stirred at room temperature for 12 hours. Upon completion, the mixture was poured into ice water and extracted with CH<sub>2</sub>Cl<sub>2</sub> (3 times). The combined organic layers were washed with saturated NaHCO<sub>3</sub>, dried with Na<sub>2</sub>SO<sub>4</sub>, and concentrated under rotary evaporator. The residue was obtained and used directly without further purification.

### **Step 2: Reaction with 2-thiopyrimidine**

Under nitrogen atmosphere, 2-thiopyrimidine (1.5 equiv.), potassium carbonate (8.0 equiv.) and DMF (0.3 M) were added to a reaction flask and the mixture was stirred at 40 °C for 30 minutes. Afterwards, a DMF solution of acetylated glycosyl bromide (1.0 equiv.) was added to a reaction flask and stirred for another 12 hours. Upon completion, the reaction was quenched with water and extracted with CH<sub>2</sub>Cl<sub>2</sub> (3 times). The combined organic layers were dried over Na<sub>2</sub>SO<sub>4</sub> and concentrated under reduced pressure. And the residue was purified by silica gel chromatography to give the desired thioglycoside.

### **Step 3: Benzylation**

Sodium methoxide (0.2 equiv.) and acetylated thioglycoside (1.0 equiv.) (Obtained from step 2) were dissolved in methanol (0.25 M), and the mixture was stirred at room temperature for 2 hours. Upon completion, the mixture was concentrated under reduced pressure and further dried under vacuum. Then, the residue was dissolved in DMF (0.25 M) at 0 °C, and NaH (8.0 equiv.) was added in batches. Afterwards, benzyl bromide (8.0 equiv.) was added dropwise at same temperature, and the reaction was allowed to warm up to room temperature (25 °C) and stirred for 12 hours. The reaction was then quenched by water and extracted with CH<sub>2</sub>Cl<sub>2</sub> (3 times). The combined organic layers were washed with water (3 times), dried over Na<sub>2</sub>SO<sub>4</sub>, and concentrated under reduced pressure. The residue was purified by silica gel chromatography to give the benzylated thioglycoside.

### **Step 4: Oxidation**

Benzylated thioglycoside (1.0 equiv.) and a catalytic amount of RuCl<sub>3</sub> (0.1 equiv.) were dissolved in a mixed solvent (0.1 M) (H<sub>2</sub>O/CCl<sub>4</sub>/CH<sub>3</sub>CN = 3:2:2) at 0 °C. NaIO<sub>4</sub> (4.5 equiv.) was added in batches and the mixture was allowed to warm up to 25 °C, and stirred for 2 hours. Subsequently, the mixture was extracted with CH<sub>2</sub>Cl<sub>2</sub> (3 times). The combined organic layers were washed with water, dried over Na<sub>2</sub>SO<sub>4</sub> and concentrated under reduced pressure. The resulting residue was purified by silica gel chromatography to give the sulfone product.

### **Step 5: Removal of pyrimidine moiety**

Under nitrogen atmosphere, NaH (3.0 equiv.) was dissolved in THF (0.5M) at 0 °C, and BnSH (0.3 equiv.) was added dropwise. After that, a THF solution of sulfone product (Obtained from step 4) was added and the resulting mixture was stirred at 0 °C for 2 hours and then warmed up to room temperature for several hours until completion of sugar substrate. Afterwards, the mixture was concentrated under reduced pressure. The resulting residue was washed with petroleum ether and ethyl acetate, and dried under vacuum to give the sodium glycosyl sulfinic acid.

## Step 6: Oxidation

*m*CPBA (3.0 equiv.) in a round bottom flask was dried under vacuum. To the flask was added a CH<sub>2</sub>Cl<sub>2</sub> (0.05 M) solution of acetylated thioglycoside (1.0 equiv.) (Obtained from step 2) at 0 °C. The temperature was warmed to room temperature. After stirring for 4 hours, the reaction mixture was treated with 1 M Na<sub>2</sub>SO<sub>3</sub> and saturated aqueous NaHCO<sub>3</sub> at room temperature. The organic phase was separated and the aqueous layer was extracted with CH<sub>2</sub>Cl<sub>2</sub>. The combined organic layers were dried over Na<sub>2</sub>SO<sub>4</sub> and concentrated. The residue was purified by silica gel column chromatography eluent: hexane/EtOAc = 1:2 to give the sulfone product.

## Step 7: Removal of pyrimidine moiety

Under nitrogen atmosphere, NaH (3.0 equiv.) was dissolved in THF (0.5M) at 0 °C, and BnSH (1.0 equiv.) was added dropwise. After that, a THF solution of sulfone product (1.0 equiv.) (Obtained from step 3) was added and the resulting mixture was stirred at 0 °C for 2.5 hours and then warmed up to room temperature for 1 hours until completion of sugar substrate. Afterwards, the mixture was concentrated under reduced pressure. The resulting residue was washed with petroleum ether and ethyl acetate, and dried under vacuum to give the sodium glycosyl sulfinat.

Compounds **5c**, **g-h** were synthesized according to the literature.<sup>1</sup>

## Compound 4a

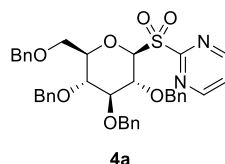

**4a** was prepared following General Procedure D using 2,3,4,6-tetra-*O*-acetyl- $\alpha$ -D-glucopyranosyl bromide (30 mmol, 12.24 g) as starting material. Petroleum ether and ethyl acetate (2:1) were used as eluents to separate on silica gel by column chromatography to obtain the title product as a white solid (11.6 g, 58% total yield).

<sup>1</sup>H NMR (400 MHz, CDCl<sub>3</sub>)  $\delta$  8.69 (d, *J* = 4.9 Hz, 2H), 7.37-7.14 (m, 20H), 7.10 (t, *J* = 4.9 Hz, 1H), 5.15 (d, *J* = 9.6 Hz, 1H), 4.97 (d, *J* = 10.3 Hz, 1H), 4.92-4.76 (m, 4H), 4.57 (d, *J* = 10.9 Hz, 1H), 4.36 (d, *J* = 11.9 Hz, 1H), 4.29-4.19 (m, 2H), 3.82 (t, *J* = 8.8 Hz, 1H), 3.65-3.48 (m, 4H) ppm.

<sup>13</sup>C NMR (101 MHz, CDCl<sub>3</sub>)  $\delta$  164.92, 158.21, 138.16, 138.13, 137.77, 137.65, 128.63, 128.60, 128.45, 128.34, 128.12, 128.09, 128.07, 127.94, 127.81, 127.78, 127.72, 123.36, 88.81, 86.38, 80.47, 77.73, 77.41, 76.05, 75.30, 75.06, 73.40, 68.68 ppm.

IR (thin film, cm<sup>-1</sup>): 2954, 2922, 2852, 2166, 2049, 1978, 1735, 1566, 1496, 1455, 1377, 1259, 1091, 1016, 798, 757, 697, 569.

$[\alpha]_D^{25} = +11.8$  (c = 0.11, CHCl<sub>3</sub>).

**HRMS (ESI-TOF):** calculated for  $C_{38}H_{38}N_2O_7SNa^+$   $[M+Na]^+$ : 689.2292, found: 689.2285.

**m. p.:** 126.5-126.9°C.

### Compound 5a

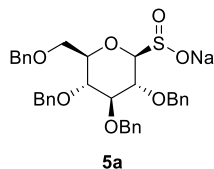

**5a** was prepared following General Procedure D from **4a** (17.4 mmol, 11.6 g) as a white solid (10.5 g, 99% yield).

**<sup>1</sup>H NMR (400 MHz, CDCl<sub>3</sub>)** δ 7.34-7.29 (m, 6H), 7.25-7.14 (m, 12H), 6.86 (d, *J* = 6.3 Hz, 2H), 4.94 (t, *J* = 11.0 Hz, 2H), 4.84-4.77 (m, 2H), 4.72 (d, *J* = 12.4 Hz, 1H), 4.61 (d, *J* = 11.6 Hz, 2H), 4.09 (d, *J* = 10.7 Hz, 1H), 3.89 (t, *J* = 9.5 Hz, 1H), 3.73 (q, *J* = 9.0 Hz, 3H), 3.63-3.48 (m, 3H) ppm.

**IR (thin film, cm<sup>-1</sup>):** 2648, 2286, 2185, 2161, 2049, 2026, 1979, 1028, 1067, 695, 529, 414.

**[α]<sub>D</sub><sup>25</sup>** = -105.4 (c = 0.10, MeOH).

**HRMS (ESI-TOF):** calculated for  $C_{34}H_{36}NaO_7S^+$   $[M+H]^+$ : 611.2074, found: 611.2064.

**m. p.:** 299.0-300.0 °C.

### Compound 5b

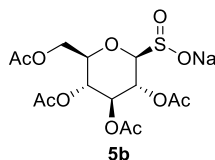

**5b** was prepared following General Procedure D using 2,3,4,6-tetra-*O*-acetyl-α-D-glucopyranosyl bromide (2.70 mmol, 1.11 g) as starting material. as a white solid (979 mg, 86% total yield).

**<sup>1</sup>H NMR (400 MHz, DMSO-*d*<sub>6</sub>)** δ 5.20 – 5.04 (m, 2H), 4.86 (t, *J* = 9.6 Hz, 1H), 4.15 (dd, *J* = 12.4, 4.8 Hz, 1H), 3.98 (dd, *J* = 12.5, 2.4 Hz, 1H), 3.86 – 3.79 (m, 1H), 3.36 (s, 1H), 2.05 – 1.84 (m, 12H) ppm.

**<sup>13</sup>C NMR (101 MHz, DMSO-*d*<sub>6</sub>)** δ 170.19, 169.71, 169.28, 169.11, 91.59, 74.60, 74.35, 68.11, 67.55, 62.15, 20.83, 20.58, 20.37, 20.37 ppm.

**IR (thin film, cm<sup>-1</sup>):** 3321, 1644, 1559, 1410, 1241, 1014, 964, 467.

**[α]<sub>D</sub><sup>25</sup>** = +19.1 (c = 0.11, CHCl<sub>3</sub>).

**HRMS (ESI-TOF):** calculated for  $C_{14}H_{19}Na_2O_{11}S^+$   $[M+Na]^+$ : 441.0438, found: 441.0430.

## Compound 4d

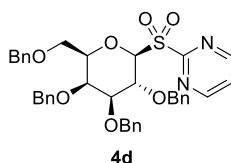

**4d** was prepared following General Procedure D from D-Galactose (20 mmol, 3.60 g) as a solid (3.0 g, 24% total yield).

**<sup>1</sup>H NMR (400 MHz, CDCl<sub>3</sub>)** δ 8.62 (d, *J* = 4.9 Hz, 2H), 7.34-7.18(m, 20H), 7.11 (t, *J* = 4.9 Hz, 1H), 5.11 (d, *J* = 9.5 Hz, 1H), 4.92 (t, *J* = 8.3 Hz, 3H), 4.76-4.52 (m, 4H), 4.31 (s, 2H), 3.94 (d, *J* = 2.6 Hz, 1H), 3.74-3.64 (m, 2H), 3.49 (d, *J* = 6.3 Hz, 2H) ppm.

**<sup>13</sup>C NMR (101 MHz, CDCl<sub>3</sub>)** δ 164.93, 158.07, 138.47, 137.98, 137.87, 137.78, 128.60, 128.51, 128.35, 128.19, 128.05, 127.97, 127.93, 127.70, 127.68, 127.54, 123.22, 89.47, 83.82, 78.69, 75.05, 74.64, 74.52, 73.54, 73.08, 72.69, 68.31 ppm.

**IR (thin film, cm<sup>-1</sup>):** 2954, 2922, 2852, 2050, 1980, 1566, 1454, 1677, 1259, 1094, 1016, 796, 757, 696, 562.

**[α]<sub>D</sub><sup>25</sup>** = +14.7 (*c* = 0.15, CHCl<sub>3</sub>).

**HRMS (ESI-TOF):** calculated for C<sub>38</sub>H<sub>38</sub>N<sub>2</sub>O<sub>7</sub>SNa<sup>+</sup> [*M*+Na]<sup>+</sup>: 689.2292, found: 689.2283.

**m.p.:** 158.5-162.2°C.

## Compound 5d

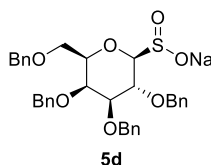

**5d** was prepared following General Procedure D as a white solid (2.3 g, 79% yield).

**<sup>1</sup>H NMR (500 MHz, CDCl<sub>3</sub>)** δ 7.32-7.26 (m, 6H), 7.25-7.12 (m, 14H), 4.94-4.91 (m, 2H), 4.81 (d, *J* = 10.4 Hz, 1H), 4.68 (d, *J* = 12.0 Hz, 1H), 4.65-4.53 (m, 3H), 4.26 (d, *J* = 12.4 Hz, 1H), 4.19 (t, *J* = 10.0 Hz, 1H), 3.71 (t, *J* = 10.0 Hz, 1H), 3.66-3.59 (m, 2H), 3.53 (dd, *J* = 9.5, 2.7 Hz, 1H), 3.45 (dd, *J* = 8.2, 4.3 Hz, 1H), 3.03 (dd, *J* = 10.1, 4.1 Hz, 1H) ppm.

**<sup>13</sup>C NMR (126 MHz, CDCl<sub>3</sub>)** δ 138.71, 138.38, 137.61, 137.38, 129.29, 128.69, 128.56, 128.50, 128.44, 128.35, 128.09, 127.84, 127.78, 127.62, 93.37, 84.40, 77.83, 76.53, 75.34, 73.91, 73.20, 72.89, 72.11, 68.63 ppm.

**IR (thin film, cm<sup>-1</sup>):** 3379, 2323, 2199, 2050, 2036, 1980, 1641, 1496, 1453, 1365, 1075, 733, 697, 441.

**[α]<sub>D</sub><sup>30</sup>** = -225.96 (*c* = 0.16, MeOH).

**HRMS (ESI-TOF):** calculated for C<sub>34</sub>H<sub>36</sub>NaO<sub>7</sub>S<sup>+</sup> [*M*+H]<sup>+</sup>: 611.2074, found: 611.2059.

**m. p.:** 221.2-222.1°C.

## Compound 4e

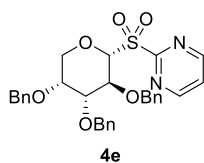

**4e** was prepared following General Procedure D from D-Arabinose (20 mmol, 3.0 g) as a white solid (1.9 g, 18% total yield).

**<sup>1</sup>H NMR (400 MHz, CDCl<sub>3</sub>)** δ 8.71 (d, *J* = 4.7 Hz, 2H), 7.36-7.21 (m, 14H), 7.16-7.13 (m, 2H), 5.19 (d, *J* = 8.2 Hz, 1H), 4.89 (d, *J* = 10.7 Hz, 1H), 4.79 (d, *J* = 10.7 Hz, 1H), 4.67 (d, *J* = 12.4 Hz, 1H), 4.63-4.56(m, 4H), 4.29 (dd, *J* = 12.5, 3.3 Hz, 1H), 3.79-3.75 (m, 1H), 3.69 (dd, *J* = 8.5, 3.0 Hz, 1H), 3.44 (dd, *J* = 12.5, 1.8 Hz, 1H) ppm.

**<sup>13</sup>C NMR (101 MHz, CDCl<sub>3</sub>)** δ 165.32, 158.26, 137.94, 137.93, 137.84, 128.56, 128.26, 128.01, 127.91, 127.85, 127.60, 123.37, 89.20, 80.49, 74.62, 73.98, 71.98, 71.64, 71.22, 67.20 ppm.

**IR (thin film, cm<sup>-1</sup>):** 2954, 2922, 2851, 2323, 2284, 2161, 2049, 2020, 1979, 1565, 1496, 1454, 1378, 1335, 1259, 1213, 1130, 1095, 1017, 797, 734, 697, 543, 457.

**[α]<sub>D</sub><sup>25</sup>** = -25.0 (c = 0.12, CHCl<sub>3</sub>).

**HRMS (ESI-TOF):** calculated for C<sub>30</sub>H<sub>30</sub>N<sub>2</sub>O<sub>6</sub>SNa<sup>+</sup> [M+Na]<sup>+</sup>: 569.1717, found: 569.1713.

**m.p.:** 166.9-167.6°C.

**Note:** <sup>1</sup>H NMR data of the precursor for preparation of **4e** is in agreement with that reported in literature.<sup>2</sup> **<sup>1</sup>H NMR (400 MHz, CDCl<sub>3</sub>)** δ 8.55 (d, *J* = 4.9 Hz, 2H), 7.37 – 7.23 (m, 15H), 6.99 (t, *J* = 4.9 Hz, 1H), 6.32 (d, *J* = 3.5 Hz, 1H), 4.77 – 4.52 (m, 6H), 4.23 (dd, *J* = 11.4, 8.6 Hz, 1H), 4.02 – 3.96 (m, 1H), 3.94 (dt, *J* = 8.5, 3.5 Hz, 1H), 3.83 (dd, *J* = 5.1, 2.9 Hz, 1H), 3.66 (dd, *J* = 11.4, 3.9 Hz, 1H).

## Compound 5e

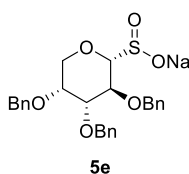

**5e** was prepared following General Procedure D as a white solid (1.7 g, 99% yield).

**<sup>1</sup>H NMR (500 MHz, DMSO-*d*<sub>6</sub>)** δ 7.43 – 7.20 (m, 15H), 4.74 – 4.45 (m, 7H), 4.11 – 3.96 (m, 2H), 3.80-3.75 (m, 2H), 3.02 (d, *J* = 5.4 Hz, 1H) ppm.

**<sup>13</sup>C NMR (101 MHz, DMSO-*d*<sub>6</sub>)** δ 139.06, 138.91, 138.77, 128.19, 128.14, 128.06, 127.64, 127.59, 127.51, 127.39, 127.33, 127.22, 97.64, 77.71, 74.56, 72.18, 72.11, 70.56, 69.95, 63.97 ppm.

**IR (thin film, cm<sup>-1</sup>):** 3354, 2162, 2115, 1637, 1453, 1087, 1016, 459.

**[α]<sub>D</sub><sup>30</sup>** = -346.4 (c = 0.13, MeOH).

**HRMS (ESI-TOF):** calculated for C<sub>26</sub>H<sub>28</sub>NaO<sub>6</sub>S<sup>+</sup> [M+H]<sup>+</sup>: 491.1499, found: 491.1493.

**m. p.:** 290.5-291.2°C.

## Compound 4f

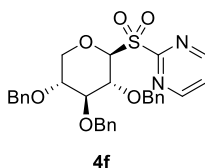

**4f** was prepared following General Procedure D from D-xylose (20 mmol, 3.0 g) as a white solid (1.1 g, 12% total yield).

**<sup>1</sup>H NMR (400 MHz, CDCl<sub>3</sub>)** δ 8.77 (d, *J* = 4.8 Hz, 2H), 7.38-7.14 (m, 16H), 5.19 (d, *J* = 9.3 Hz, 1H), 5.00-4.75 (m, 4H), 4.73-4.53 (m, 2H), 4.18 (t, *J* = 9.0 Hz, 1H), 4.07 (dd, *J* = 11.5, 5.0 Hz, 1H), 3.77 (t, *J* = 8.7 Hz, 1H), 3.72-3.66 (m, 1H), 3.33 (dd, *J* = 11.6, 9.2 Hz, 1H) ppm.

**<sup>13</sup>C NMR (101 MHz, CDCl<sub>3</sub>)** δ 164.94, 158.42, 138.19, 137.79, 137.66, 128.67, 128.56, 128.29, 128.18, 128.04, 127.96, 127.92, 127.70, 123.58, 89.05, 84.96, 77.42, 76.68, 75.68, 74.97, 73.45, 68.43 ppm.

**IR (thin film, cm<sup>-1</sup>):** 2954, 2922, 2851, 2323, 2165, 2112, 2049, 1980, 1565, 1496, 1455, 1377, 1339, 1259, 1212, 1016, 799, 756, 697, 606, 562, 458.

**[α]<sub>D</sub><sup>25</sup>** = +19.4 (c = 0.16, CHCl<sub>3</sub>).

**HRMS (ESI-TOF):** calculated for C<sub>30</sub>H<sub>30</sub>N<sub>2</sub>O<sub>6</sub>SNa<sup>+</sup> [M+Na]<sup>+</sup>: 569.1717, found: 569.1710.

**m. p.:** 180.9-181.5°C.

## Compound 5f

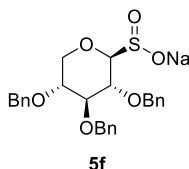

**5f** was prepared following General Procedure D as white solid (1.2 g, 100% yield).

**<sup>1</sup>H NMR (400 MHz, DMSO-*d*<sub>6</sub>):** δ 7.39 – 7.23 (m, 15H), 5.03 (d, *J* = 10.1 Hz, 1H), 4.81-4.71 (m, 2H), 4.65-4.59 (m, 2H), 4.52 (d, *J* = 10.3 Hz, 1H), 4.13-4.05 (m, 1H), 3.82 (d, *J* = 8.5 Hz, 1H), 3.63 – 3.50 (m, 3H), 3.23 – 3.14 (m, 1H) ppm.

**<sup>13</sup>C NMR (101 MHz, DMSO-*d*<sub>6</sub>)** δ 139.20, 138.97, 138.56, 128.28, 128.18, 127.99, 127.84, 127.68, 127.56, 127.53, 127.36, 127.14, 88.17, 84.89, 79.86, 77.56, 74.52, 73.62, 71.70, 66.55 ppm.

**IR (thin film, cm<sup>-1</sup>):** 3334, 2946, 2834, 2049, 1654, 1409, 1110, 1017, 533.

**[α]<sub>D</sub><sup>30</sup>** = -458.2 (c = 0.20, MeOH).

**HRMS (ESI-TOF):** calculated for C<sub>26</sub>H<sub>28</sub>NaO<sub>6</sub>S<sup>+</sup> [M+H]<sup>+</sup>: 491.1499, found: 491.1494.

**m. p.:** 217.3-218.1°C.



## Library of diaryliodonium salts

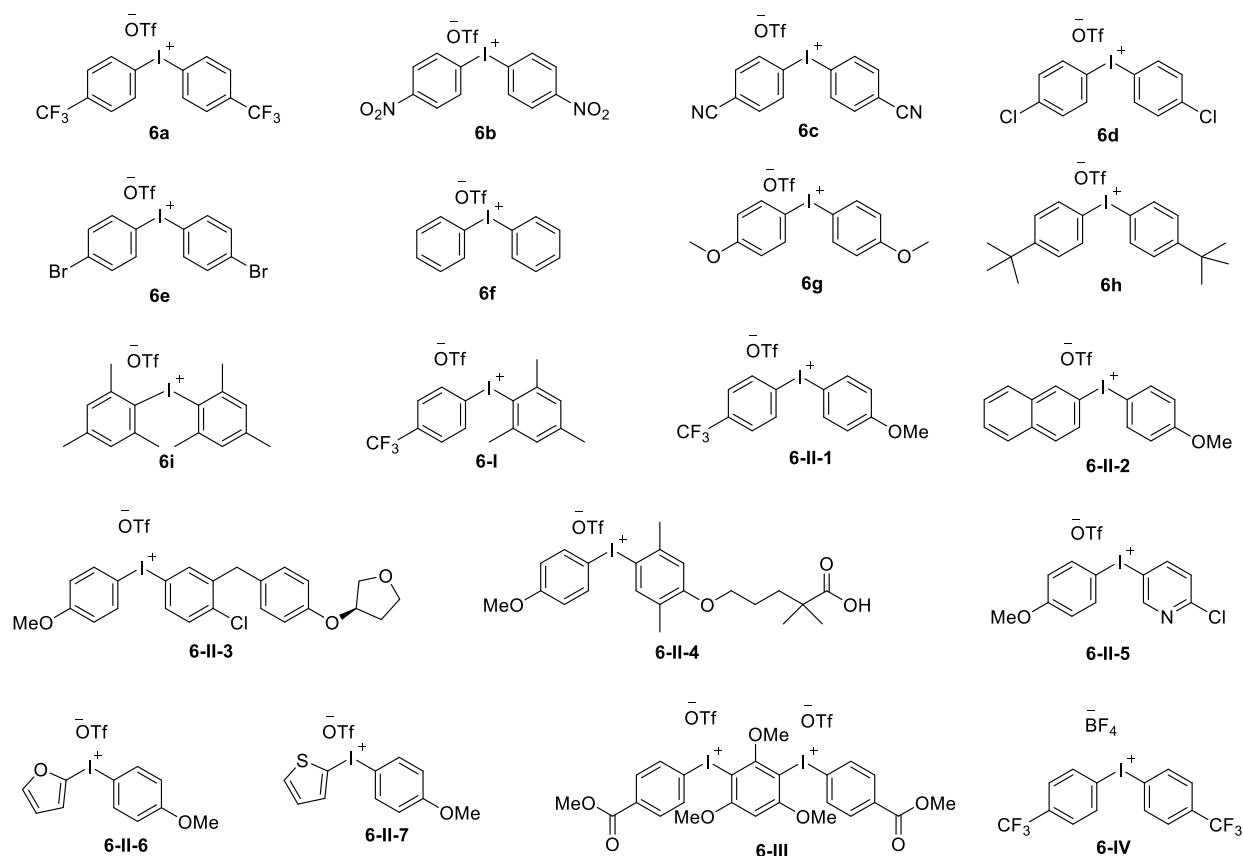

**Figure S5. Library of diaryliodonium salts**

The known diaryliodonium salts employed in this project were synthesized according to the reported procedures. In detail, compound **6a-e**, **6-II-1**, **6-IV** were synthesized according to the literature<sup>3</sup>. Compound **6g** was synthesized according to the literature<sup>4</sup>. Compound **6f** was purchased commercially. Compound **6i**, **6-I**, **6-II-3**, **6-II-5** were synthesized according to the literature<sup>5</sup>. Compound **6-II-2**, **6-II-6**, **6-II-7** were synthesized according to the literature<sup>6</sup>; Compound **6-II-4** was synthesized according to the literature<sup>7</sup>.

### Procedure for preparation of diaryliodonium salt **6-II-3**:

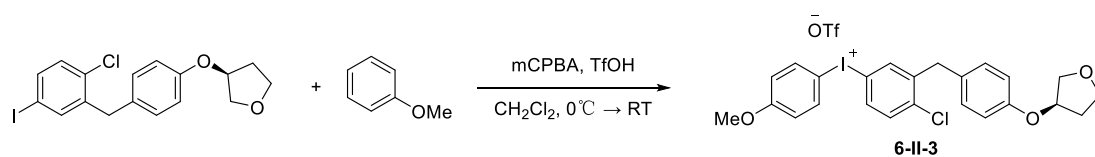

(3*S*)-3-[4-[(2-chloro-5-iodophenyl) methyl] phenoxy] tetrahydrofuran (2.0 mmol, 1.0 equiv.), anisole (2.2 mmol, 1.1 equiv.), and *m*-CPBA (2.2 mmol, 1.1 equiv.) were dissolved in CH<sub>2</sub>Cl<sub>2</sub> (10 mL) at 0 °C, and TfOH (3.2 mmol, 1.6 equiv.) was added dropwise. The mixture was allowed to warm up

to room temperature and stirred for several hours until completion. Then the solvent was removed and the resulting residue was suspended in ether. The precipitation was filtered, washed with ether and dried under vacuum to give **6-II-3** (524 mg, 79%).

**<sup>1</sup>H NMR (400 MHz, DMSO-*d*<sub>6</sub>)** δ 8.21-8.10 (m, 3H), 8.03 (dd, *J* = 8.5, 2.2 Hz, 1H), 7.59 (d, *J* = 8.5 Hz, 1H), 7.11-7.04 (m, 4H), 6.83 (d, *J* = 8.5 Hz, 2H), 4.99-4.95 (m, 1H), 3.99 (s, 2H), 3.91-3.69 (m, 7H), 2.24-2.15 (m, 1H), 1.95-1.88 (m, 1H) ppm.

**<sup>19</sup>F NMR (376 MHz, DMSO-*d*<sub>6</sub>)** δ -77.74 ppm.

**<sup>13</sup>C NMR (101 MHz, DMSO)** δ 162.03, 155.77, 142.58, 137.17, 136.96, 136.94, 134.07, 132.33, 130.23, 129.78, 120.68 (q, *J* = 323.2 Hz), 117.49, 115.31, 114.96, 105.64, 76.97, 72.23, 66.38, 55.72, 37.36, 32.41 ppm.

**IR (thin film, cm<sup>-1</sup>):** 3327, 2943, 2832, 2285, 2164, 2064, 2049, 1979, 1654, 1448, 1413, 1111, 1021, 603.

**HRMS (ESI-TOF):** calculated for C<sub>24</sub>H<sub>23</sub>ClIO<sub>3</sub><sup>+</sup> [M-OTf]<sup>+</sup>: 521.0375, found: 521.0372.

**m.p.:** 214.5-215.1°C

#### Procedure for preparation of diaryliodonium salt **6-II-4**:

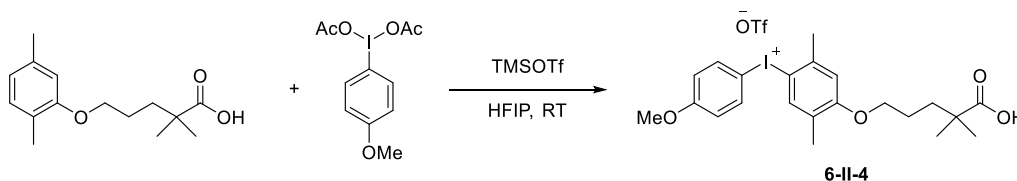

(4-Methoxyphenyl)-λ<sup>3</sup>-iodanediyl diacetate (2.2 mmol, 1.1 equiv.) was dissolved in hexafluoroisopropanol (7 mL) at 0 °C. Gemfibrozil (2.0 mmol, 1.0 equiv.) was added to the solution and stirred for 5 minutes. Then, TMSOTf (2.2 mmol, 1.1 equiv.) was added and stirred for 5 minutes at same temperature. After that, the reaction was allowed to warm up to room temperature and stirred for 4 hours. Then the solvent was removed and the resulting residue was suspended in ether. The precipitation was filtered, washed with ether and dried under vacuum to give **6-II-4** (500 mg, 41%).

**<sup>1</sup>H NMR (400 MHz, DMSO-*d*<sub>6</sub>)** δ 12.13 (s, 1H), 8.12 (s, 1H), 8.10-8.02 (m, 2H), 7.10-7.01 (m, 3H), 3.98 (t, *J* = 6.0 Hz, 2H), 3.78 (s, 3H), 2.54 (s, 3H), 2.12 (s, 3H), 1.70-1.55 (m, 4H), 1.10 (s, 6H) ppm.

**<sup>19</sup>F NMR (376 MHz, DMSO-*d*<sub>6</sub>)** δ -77.75 ppm.

**<sup>13</sup>C NMR (101 MHz, DMSO)** δ 178.63, 161.75, 159.69, 140.13, 138.02, 136.65, 127.23, 120.68 (q, *J* = 324.2 Hz), 117.39, 113.74, 109.87, 104.96, 68.26, 55.66, 40.96, 36.28, 24.90, 24.79, 24.45, 15.13 ppm.

**IR (thin film, cm<sup>-1</sup>):** 3326, 2944, 2832, 2323, 2050, 1980, 1654, 1448, 1412, 1258, 1112, 1020, 584.

**HRMS (ESI-TOF):** calculated for C<sub>22</sub>H<sub>28</sub>IO<sub>4</sub><sup>+</sup> [M-OTf]<sup>+</sup>: 483.1027, found: 483.1022.

m.p.: 148.6-148.9°C

**Procedure for preparation of diaryliodonium salt 6-III:**

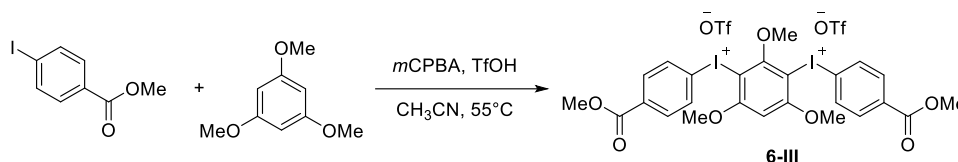

Methyl 4-iodobenzoate (2.0 mmol, 1.0 equiv.) and *m*-CPBA (2.4 mmol, 1.2 equiv.) were dissolved in acetonitrile (3 mL). Then, triflic acid (2.0 mmol, 1.0 equiv.) was added dropwise at room temperature. The reaction was allowed to warm up to 55°C and stirred for 1 hour. Afterwards, 1,3,5-trimethoxybenzene (2.0 mmol, 1.0 equiv.) was added and stirred for 20 minutes. Upon completion, the mixture was concentrated with rotary evaporator. And the residue was suspended in ether and stirred for 10 mins. The precipitation was filtered and dried under vacuum to give the product **6-III** as a solid (284 mg, 29%).

**<sup>1</sup>H NMR (400 MHz, DMSO-*d*<sub>6</sub>)** δ 8.09 (d, *J* = 8.5 Hz, 4H), 7.90 (d, *J* = 8.5 Hz, 4H), 6.94 (s, 1H), 4.15 (s, 3H), 4.11 (s, 6H), 3.87 (s, 6H) ppm.

**<sup>19</sup>F NMR (376 MHz, DMSO-*d*<sub>6</sub>)** δ -77.75 ppm.

**<sup>13</sup>C NMR (101 MHz, DMSO-*d*<sub>6</sub>)** δ 164.95, 163.14, 159.86, 134.97, 132.57, 131.86, 121.97, 120.50 (q, *J* = 324.2 Hz), 95.48, 94.67, 64.99, 58.58, 52.76 ppm.

**IR (thin film, cm<sup>-1</sup>):** 3329, 2944, 2832, 2323, 2167, 2050, 1979, 1654, 1448, 1411, 1278, 1109, 1020, 579.

**HRMS (ESI-TOF):** calculated for C<sub>26</sub>H<sub>24</sub>F<sub>3</sub>I<sub>2</sub>O<sub>10</sub>S<sup>+</sup> [M-OTf]<sup>+</sup>: 838.9126, found: 839.9105.

m.p.: 220.7-221.7°C

## DFT calculations

Geometry optimizations were performed by Gaussian 16 package<sup>8</sup> at the B3LYP-D3(BJ)/Def2-SVP level of theory<sup>9-13</sup>. Solvation effects of dimethyl sulfoxide (DMSO) were included using the Polarizable Continuum Model (PCM) using the integral equation formalism variant (IEFPCM) with a standard state of 1 M<sup>14</sup>. Energy minima and transition states were verified through vibrational analysis. Frequency calculations were performed at the same theoretical level as for geometry optimizations to verify the stationary points as either minima or first-order saddle points on the potential energy surface, as well as to obtain thermal Gibbs free energy corrections at 298 K. Intrinsic reaction coordinate (IRC) computations were used to ensure that each transition state connected the correct two minima.

Highly accurate electronic energies were computed by ORCA 5.0.4 package<sup>15-18</sup> at the RI- $\omega$ B97M-V/Def2-QZVPP level of theory<sup>19,20</sup>. Specifically, oxygen atoms in the system were treated with the ma-Def2-QZVPP basis set<sup>21</sup>. Auxiliary basis sets for the RI-J approximation were generated automatically by ORCA<sup>22</sup>. Solvation effects were included using the solvation model based on density (SMD) with a standard state of 1 M<sup>23</sup>.

Minenkov's quasiharmonic correction<sup>24</sup> and zero-point vibrational energy scale factor for the B3LYP/Def2-SVP level of theory (1.0044)<sup>254</sup> were applied by using Shermo 2.4 package<sup>26</sup>. Hirshfeld atomic charges<sup>27</sup> and Mayer bond orders<sup>28</sup> were computed by Multiwfn 3.8(dev) package<sup>29</sup>. Optimized structures were illustrated using CYLview<sup>30</sup>.

Cartesian Coordinates and Gibbs Free Energies of Optimized Structures:

### DMSO

-553.1753003 Hartree

|   |             |             |             |
|---|-------------|-------------|-------------|
| S | 0.45060600  | -0.00391600 | 0.39320600  |
| O | -0.67593400 | -0.01025000 | 1.41798900  |
| C | 0.08022300  | 1.36960800  | -0.75296200 |
| H | 0.18081200  | 2.29429700  | -0.16906400 |
| H | 0.79700300  | 1.36598000  | -1.58644800 |
| H | -0.95342600 | 1.25461600  | -1.10970800 |
| C | 0.08373400  | -1.36738400 | -0.76602200 |
| H | -0.95021000 | -1.25164400 | -1.12167100 |
| H | 0.80049500  | -1.35396600 | -1.59942400 |
| H | 0.18669800  | -2.29734200 | -0.19097300 |

### 5c

-1160.1346440 Hartree

|   |             |             |             |
|---|-------------|-------------|-------------|
| C | -0.79740900 | 1.60283500  | 0.20974700  |
| C | 0.62452800  | 1.23474000  | -0.18902300 |
| C | 0.92416400  | -0.20178100 | 0.26084900  |
| C | -1.35509100 | -0.85251900 | 0.26488100  |
| C | -1.78865000 | 0.53216300  | -0.23122600 |
| H | 0.67492200  | 1.26265100  | -1.30095800 |
| H | -0.82536900 | 1.64778200  | 1.31816700  |
| H | -1.40072400 | -0.85427600 | 1.37298800  |

|   |             |             |             |
|---|-------------|-------------|-------------|
| H | -1.78850200 | 0.50514400  | -1.34127400 |
| H | 1.05759300  | -0.23546700 | 1.36056200  |
| O | -0.03870900 | -1.13213400 | -0.17858100 |
| S | 2.57955000  | -0.81348100 | -0.40207400 |
| O | 3.44977100  | 0.42453800  | -0.03275900 |
| O | 2.86261400  | -1.99269200 | 0.51657100  |
| O | 1.53531800  | 2.12771700  | 0.39638000  |
| H | 2.41426000  | 1.66488900  | 0.29568400  |
| O | -1.15364000 | 2.85485400  | -0.34472700 |
| H | -2.10426600 | 2.95190200  | -0.18162600 |
| O | -3.05646000 | 0.91531300  | 0.26551600  |
| H | -3.63444400 | 0.13601900  | 0.16510800  |
| C | -2.22947900 | -1.97550700 | -0.27746900 |
| H | -1.86094300 | -2.94084800 | 0.11321200  |
| H | -2.12940100 | -1.99263600 | -1.37799800 |
| O | -3.57220200 | -1.72939700 | 0.12104800  |
| H | -4.15930600 | -2.32849200 | -0.35910000 |

## A

-2541.2537582 Hartree

|   |             |             |             |
|---|-------------|-------------|-------------|
| I | 0.75377900  | -2.14533900 | -0.08717000 |
| C | -1.02719900 | -0.96421200 | -0.04427700 |
| C | -1.49185200 | -0.42932500 | -1.24456800 |
| C | -1.65417100 | -0.76756500 | 1.18427000  |
| C | -2.64906100 | 0.35000800  | -1.20123200 |
| H | -0.97632000 | -0.60063800 | -2.18953800 |
| C | -2.81212300 | 0.01350800  | 1.20324300  |
| H | -1.26303900 | -1.19708300 | 2.10649600  |
| C | -3.30403300 | 0.56530200  | 0.01644600  |
| H | -3.03429500 | 0.79024500  | -2.12186000 |
| H | -3.32386100 | 0.19252700  | 2.14942200  |
| C | 2.14663600  | -0.53203500 | 0.07401100  |
| C | 2.67237300  | 0.00025600  | -1.10130100 |
| C | 2.47253700  | -0.06797800 | 1.34725300  |
| C | 3.57459400  | 1.06042000  | -0.98581000 |
| H | 2.39416200  | -0.38319900 | -2.08289700 |
| C | 3.37403200  | 0.99380000  | 1.43837300  |
| H | 2.04156300  | -0.50551900 | 2.24775800  |
| H | 3.99980400  | 1.50444100  | -1.88648800 |
| H | 3.64362900  | 1.38608900  | 2.41979800  |
| C | -4.58386600 | 1.36807200  | 0.03630400  |
| F | -4.56821800 | 2.34791800  | -0.88173500 |
| F | -4.80032600 | 1.93434900  | 1.23350200  |
| F | -5.64873000 | 0.59048500  | -0.23398200 |

|   |            |            |             |
|---|------------|------------|-------------|
| C | 3.92187500 | 1.54988400 | 0.27702900  |
| C | 4.93548700 | 2.66387100 | 0.39715100  |
| F | 4.96658900 | 3.43226000 | -0.70258500 |
| F | 6.17641200 | 2.17382100 | 0.57488600  |
| F | 4.67294800 | 3.46152600 | 1.44498600  |

## Int1

-3148.2125513 Hartree

|   |             |             |             |
|---|-------------|-------------|-------------|
| C | 4.83841000  | -2.10976300 | 0.98405500  |
| C | 4.69739100  | -0.85383900 | 0.13662300  |
| C | 3.36868700  | -0.89781200 | -0.63289900 |
| C | 2.34076400  | -2.38966500 | 0.92623700  |
| C | 3.58484000  | -2.35275400 | 1.81856900  |
| H | 4.66754500  | 0.01289400  | 0.83253600  |
| H | 4.94911600  | -2.96786300 | 0.28944300  |
| H | 2.42682100  | -3.26133300 | 0.24907500  |
| H | 3.47195300  | -1.50413500 | 2.52525300  |
| H | 3.45535500  | -1.59601000 | -1.48740300 |
| O | 2.24990200  | -1.18764000 | 0.17058900  |
| S | 3.03925000  | 0.77777400  | -1.40026800 |
| O | 4.30009000  | 0.90183200  | -2.26831500 |
| O | 5.77235600  | -0.76013000 | -0.76311000 |
| H | 5.48958800  | -0.09329000 | -1.43380900 |
| O | 5.96965900  | -1.99720300 | 1.82078100  |
| H | 5.92093700  | -2.74687200 | 2.43359300  |
| O | 3.78352800  | -3.56801100 | 2.50974900  |
| H | 2.91300800  | -3.83169200 | 2.86221200  |
| C | 1.03890700  | -2.48893000 | 1.71092300  |
| H | 0.18794000  | -2.48809200 | 1.00667000  |
| H | 0.94466600  | -1.59700800 | 2.35651800  |
| O | 1.08317600  | -3.68326700 | 2.47723800  |
| H | 0.34681600  | -3.68595100 | 3.10357300  |
| O | 1.80195800  | 0.47218200  | -2.29160400 |
| I | -0.58461400 | 0.18615700  | -1.30377200 |
| C | -2.50607900 | -0.15253400 | -0.35675800 |
| C | -0.07729600 | 1.81037900  | -0.01045700 |
| C | -3.30491900 | -1.16489500 | -0.89468000 |
| C | -2.90107100 | 0.57956400  | 0.76306600  |
| C | -0.60920000 | 3.07379300  | -0.27665300 |
| C | 0.81205400  | 1.58843100  | 1.04220100  |
| C | -4.53534300 | -1.43877800 | -0.29425900 |
| H | -2.96286600 | -1.73320500 | -1.76208100 |
| C | -4.13474600 | 0.29513100  | 1.35363800  |
| H | -2.27112700 | 1.36030800  | 1.18787500  |

|   |             |             |             |
|---|-------------|-------------|-------------|
| C | -0.25928500 | 4.13993700  | 0.55388800  |
| H | -1.29166700 | 3.23469200  | -1.11235700 |
| C | 1.15671900  | 2.66265400  | 1.86500800  |
| H | 1.24957100  | 0.60454700  | 1.20718900  |
| C | -4.95110700 | -0.70941800 | 0.82509400  |
| H | -5.16800300 | -2.22998900 | -0.69972200 |
| H | -4.45253800 | 0.85705600  | 2.23302600  |
| H | -0.66574900 | 5.13360400  | 0.36126700  |
| C | 0.61824600  | 3.93053500  | 1.62352600  |
| H | 1.85451200  | 2.50919400  | 2.68929400  |
| C | -6.30251400 | -0.97693200 | 1.43311100  |
| C | 0.95267300  | 5.07174400  | 2.55076600  |
| F | -6.66510800 | -2.26605300 | 1.30644100  |
| F | -7.26751500 | -0.24268100 | 0.84134900  |
| F | -6.33537200 | -0.67620300 | 2.74351400  |
| F | 0.89698800  | 6.26026300  | 1.92627500  |
| F | 2.18363000  | 4.94769400  | 3.07575400  |
| F | 0.09045200  | 5.13189400  | 3.58556500  |
| S | -0.23727400 | -2.80272200 | -3.55137200 |
| O | -1.25976900 | -1.77492300 | -3.01121200 |
| C | 0.75888800  | -3.30833000 | -2.11894300 |
| H | 0.07959400  | -3.83270900 | -1.43442300 |
| H | 1.55010900  | -3.98932400 | -2.46189400 |
| H | 1.18123700  | -2.41576600 | -1.64148900 |
| C | 1.02431100  | -1.82921800 | -4.42340100 |
| H | 1.43781900  | -1.06269400 | -3.74642400 |
| H | 1.80083600  | -2.51993700 | -4.78255400 |
| H | 0.50996400  | -1.36828400 | -5.27733200 |

## Int2

-3148.2095873 Hartree

|   |             |             |             |
|---|-------------|-------------|-------------|
| C | -4.71158500 | 0.38676100  | -0.27509400 |
| C | -3.26284800 | 0.84511500  | -0.29002800 |
| C | -3.05308800 | 2.02178000  | 0.67538600  |
| C | -4.97021900 | 1.46209000  | 1.97757400  |
| C | -5.20227100 | 0.19099500  | 1.15307100  |
| H | -2.65967000 | -0.00071800 | 0.08684800  |
| H | -5.32841300 | 1.18519700  | -0.73647500 |
| H | -5.57960300 | 2.28029900  | 1.54523800  |
| H | -4.60625600 | -0.62259300 | 1.61311300  |
| H | -3.40202700 | 2.97150600  | 0.22508300  |
| O | -3.59106000 | 1.80311700  | 1.95507700  |
| S | -1.22520300 | 2.24828800  | 1.00818900  |
| O | -0.70939900 | 2.19122200  | -0.49900400 |

|   |             |             |             |
|---|-------------|-------------|-------------|
| O | -2.89415500 | 1.20049700  | -1.59787300 |
| H | -1.99500500 | 1.58944800  | -1.49777300 |
| O | -4.82966100 | -0.81596100 | -1.00927200 |
| H | -5.69161200 | -1.19179300 | -0.77430200 |
| O | -6.56741300 | -0.16543400 | 1.07090500  |
| H | -6.92857500 | -0.07633700 | 1.97270900  |
| C | -5.32295700 | 1.28662000  | 3.44902700  |
| H | -5.12667700 | 2.23331300  | 3.98314400  |
| H | -4.65852800 | 0.51155500  | 3.87232400  |
| O | -6.69018300 | 0.90954200  | 3.53817300  |
| H | -6.88235300 | 0.62934400  | 4.44307800  |
| O | -1.11232100 | 3.66485100  | 1.53408200  |
| I | 1.41489600  | 0.77022100  | -0.68177300 |
| C | 3.11679100  | -0.57367200 | -0.76503200 |
| C | -0.01545600 | -0.80307900 | -0.47076700 |
| C | 4.38528900  | 0.00216600  | -0.66577600 |
| C | 2.94146500  | -1.94932700 | -0.91643000 |
| C | -0.76165100 | -1.19410500 | -1.58157500 |
| C | -0.27063200 | -1.30983600 | 0.80725800  |
| C | 5.50559900  | -0.83042100 | -0.71445700 |
| H | 4.49239700  | 1.08416900  | -0.56398400 |
| C | 4.06983200  | -2.77123500 | -0.96188500 |
| H | 1.94862300  | -2.39174100 | -1.00124300 |
| C | -1.80478200 | -2.10677000 | -1.40576000 |
| H | -0.56381600 | -0.77790100 | -2.56948700 |
| C | -1.30694800 | -2.22861700 | 0.96945100  |
| H | 0.31221300  | -0.98442400 | 1.66953800  |
| C | 5.34837900  | -2.21305800 | -0.85877600 |
| H | 6.50415400  | -0.39652800 | -0.64370300 |
| H | 3.94805900  | -3.84847900 | -1.08501600 |
| H | -2.42514400 | -2.39282900 | -2.25383900 |
| C | -2.07998300 | -2.61153000 | -0.13418400 |
| H | -1.52769500 | -2.62330700 | 1.96280100  |
| C | 6.55655200  | -3.11198700 | -0.85511500 |
| C | -3.22824800 | -3.56222000 | 0.08619000  |
| F | 6.85166700  | -3.54181100 | 0.38958200  |
| F | 7.65292500  | -2.48714400 | -1.31949100 |
| F | 6.36912700  | -4.21044700 | -1.60868700 |
| F | -4.06772500 | -3.11171300 | 1.04085100  |
| F | -2.78859600 | -4.76697200 | 0.50772800  |
| F | -3.95130900 | -3.77075900 | -1.02151300 |
| S | 2.92373300  | 4.21158500  | -0.30470700 |
| O | 3.16031200  | 2.77445000  | -0.82577000 |
| C | 2.30203800  | 4.07368100  | 1.40263100  |



|   |            |            |             |
|---|------------|------------|-------------|
| H | 2.98922900 | 3.39060300 | 1.91886300  |
| H | 2.36373300 | 5.07549800 | 1.85190700  |
| H | 1.26363500 | 3.71412800 | 1.42643300  |
| C | 1.39159400 | 4.78041000 | -1.09912800 |
| H | 0.57413900 | 4.07921900 | -0.87258100 |
| H | 1.16794300 | 5.78891300 | -0.72249300 |
| H | 1.60101100 | 4.81788700 | -2.17629500 |

### Int3

-3148.2043705 Hartree

|   |             |             |             |
|---|-------------|-------------|-------------|
| C | 4.94322500  | 1.97475100  | 0.72771600  |
| C | 3.64883700  | 2.20521900  | -0.03845200 |
| C | 3.70897100  | 1.45066500  | -1.37686700 |
| C | 5.31917200  | -0.11830900 | -0.62138700 |
| C | 5.30853400  | 0.49672500  | 0.78161600  |
| H | 2.82640400  | 1.77194200  | 0.56748200  |
| H | 5.75007900  | 2.49962200  | 0.17589400  |
| H | 6.12455700  | 0.36723600  | -1.20656900 |
| H | 4.53188800  | -0.02121500 | 1.37442000  |
| H | 4.36734000  | 1.98975300  | -2.08669200 |
| O | 4.05807000  | 0.09992400  | -1.24707500 |
| S | 2.04585800  | 1.46308900  | -2.22924000 |
| O | 1.69879900  | 2.96376300  | -2.12104800 |
| O | 3.46864500  | 3.58076100  | -0.25202100 |
| H | 2.73869400  | 3.63790200  | -0.91372300 |
| O | 4.81980000  | 2.49071300  | 2.03776300  |
| H | 5.60152100  | 2.17557100  | 2.51718400  |
| O | 6.56793000  | 0.41498800  | 1.41635800  |
| H | 6.83406100  | -0.52059600 | 1.33977700  |
| C | 5.49913700  | -1.63556900 | -0.61211600 |
| H | 5.69458800  | -1.99254200 | -1.63832000 |
| H | 4.54350100  | -2.06669300 | -0.28385800 |
| O | 6.55591700  | -2.00876500 | 0.26616700  |
| H | 6.30527900  | -2.82607100 | 0.71729400  |
| O | 2.36487700  | 1.03696400  | -3.64481000 |
| I | -0.48030500 | 0.00315200  | -1.04675100 |
| C | -2.23042700 | -0.95894700 | -0.14591700 |
| C | 0.89193800  | -0.95843300 | 0.28054300  |
| C | -3.47442100 | -0.67143200 | -0.70555300 |
| C | -2.07765700 | -1.81287800 | 0.94405600  |
| C | 1.26687200  | -0.32284900 | 1.46528000  |
| C | 1.41644900  | -2.19693000 | -0.09219400 |
| C | -4.60617000 | -1.26742600 | -0.14379100 |
| H | -3.55314500 | 0.00005400  | -1.56277800 |

|   |             |             |             |
|---|-------------|-------------|-------------|
| C | -3.22013200 | -2.40073900 | 1.49353000  |
| H | -1.10152600 | -2.03394200 | 1.37361700  |
| C | 2.21707500  | -0.93532100 | 2.28474700  |
| H | 0.84094500  | 0.64003200  | 1.74963400  |
| C | 2.35031700  | -2.81023700 | 0.74330700  |
| H | 1.11273300  | -2.68297100 | -1.02005500 |
| C | -4.47995200 | -2.12757800 | 0.95214500  |
| H | -5.58915600 | -1.06124600 | -0.57019600 |
| H | -3.11982500 | -3.07700800 | 2.34363000  |
| H | 2.54566500  | -0.43569800 | 3.19675600  |
| C | 2.76389500  | -2.16891500 | 1.91577800  |
| H | 2.77451800  | -3.77513400 | 0.46294400  |
| C | -5.71143900 | -2.72409100 | 1.58258200  |
| C | 3.81596500  | -2.81137600 | 2.78492700  |
| F | -6.69319600 | -2.91693800 | 0.68429700  |
| F | -6.21444900 | -1.92121400 | 2.54267600  |
| F | -5.45644800 | -3.91014400 | 2.16248200  |
| F | 4.55568700  | -1.89567500 | 3.43063700  |
| F | 4.66928500  | -3.56417900 | 2.04921800  |
| F | 3.28595000  | -3.62413600 | 3.71095100  |
| S | -2.12221800 | 2.12887900  | -3.82479300 |
| O | -2.21403800 | 1.02407100  | -2.74487700 |
| C | -0.78360300 | 1.62954700  | -4.94497700 |
| H | -1.11638500 | 0.69114800  | -5.40840700 |
| H | -0.68087800 | 2.40853600  | -5.71417000 |
| H | 0.16417100  | 1.48402600  | -4.40600200 |
| C | -1.33232600 | 3.55211100  | -3.02621500 |
| H | -0.32912200 | 3.28586100  | -2.65383500 |
| H | -1.27641400 | 4.36287400  | -3.76705900 |
| H | -2.00436300 | 3.84237000  | -2.20742500 |

## TS1

-3148.1715601 Hartree

|   |            |             |             |
|---|------------|-------------|-------------|
| C | 4.51714100 | -0.71523600 | 1.34236600  |
| C | 3.89707300 | 0.31694500  | 0.41337100  |
| C | 2.99378800 | -0.40936500 | -0.59951600 |
| C | 2.61179600 | -2.28003500 | 0.81486000  |
| C | 3.44883600 | -1.63409500 | 1.92547000  |
| H | 3.26624000 | 0.98854600  | 1.03133300  |
| H | 5.20346000 | -1.34103600 | 0.73562500  |
| H | 3.26655900 | -2.94345900 | 0.21798200  |
| H | 2.76716400 | -1.01465700 | 2.54495100  |
| H | 3.60968500 | -0.90923500 | -1.37153100 |
| O | 2.05090700 | -1.26723800 | -0.01830500 |

|   |             |             |             |
|---|-------------|-------------|-------------|
| S | 1.95541000  | 0.84981600  | -1.49186400 |
| O | 2.92259400  | 1.95474500  | -1.85133900 |
| O | 4.91216100  | 1.02040300  | -0.25298900 |
| H | 4.45301500  | 1.60418000  | -0.89125800 |
| O | 5.21868800  | -0.06057400 | 2.37523100  |
| H | 5.45043300  | -0.75095100 | 3.01551200  |
| O | 4.12641800  | -2.59040400 | 2.71099000  |
| H | 3.47162200  | -3.27961200 | 2.93041900  |
| C | 1.43081600  | -3.07550300 | 1.35661400  |
| H | 0.87545800  | -3.52400400 | 0.51661400  |
| H | 0.75252200  | -2.38017500 | 1.88384800  |
| O | 1.93702600  | -4.07216100 | 2.23190000  |
| H | 1.20055200  | -4.47878200 | 2.70797000  |
| O | 1.34080800  | 0.11644100  | -2.67303300 |
| I | -1.23218500 | 0.38303200  | -1.85543400 |
| C | -2.98239000 | 0.50968200  | -0.64217400 |
| C | 0.01180300  | 1.62418100  | -0.17411900 |
| C | -3.82523400 | -0.60506200 | -0.63829300 |
| C | -3.24635000 | 1.64198400  | 0.13159500  |
| C | 0.02163900  | 3.01205200  | -0.32814600 |
| C | -0.05441600 | 1.01452800  | 1.08111000  |
| C | -4.96403700 | -0.57908500 | 0.16991200  |
| H | -3.59423000 | -1.46868300 | -1.26701800 |
| C | -4.38237300 | 1.64895800  | 0.94249500  |
| H | -2.58431800 | 2.50728100  | 0.12094000  |
| C | -0.04272100 | 3.80918900  | 0.81575800  |
| H | 0.08331700  | 3.47155600  | -1.31550000 |
| C | -0.11709000 | 1.82766400  | 2.21188600  |
| H | -0.04124800 | -0.06992500 | 1.17996100  |
| C | -5.23864800 | 0.54197000  | 0.96076900  |
| H | -5.63209200 | -1.44128300 | 0.18995700  |
| H | -4.59447500 | 2.52037900  | 1.56394500  |
| H | -0.03621900 | 4.89547400  | 0.71078800  |
| C | -0.11884600 | 3.22368600  | 2.08615600  |
| H | -0.16339700 | 1.36437300  | 3.19910800  |
| C | -6.48768600 | 0.58497900  | 1.80122100  |
| C | -0.27540600 | 4.08505000  | 3.30448200  |
| F | -6.91479800 | -0.64467500 | 2.13729100  |
| F | -7.50433500 | 1.18636400  | 1.14918900  |
| F | -6.30098000 | 1.27256300  | 2.94260700  |
| F | 0.28390400  | 5.29904500  | 3.14495000  |
| F | 0.28116800  | 3.52609300  | 4.39598900  |
| F | -1.57654200 | 4.29931500  | 3.60686300  |
| S | -1.42824900 | -3.17407800 | -3.37898900 |

|   |             |             |             |
|---|-------------|-------------|-------------|
| O | -2.44878300 | -2.05915300 | -3.10845200 |
| C | -0.37089900 | -3.32873300 | -1.89703100 |
| H | -1.04813000 | -3.55149700 | -1.06205800 |
| H | 0.31314400  | -4.17399000 | -2.05931900 |
| H | 0.19052600  | -2.40450800 | -1.70934300 |
| C | -0.17592200 | -2.45510800 | -4.49233600 |
| H | 0.31420500  | -1.59875700 | -4.00817100 |
| H | 0.55552900  | -3.23657300 | -4.74373200 |
| H | -0.71786500 | -2.14256900 | -5.39457100 |

## TS2

-3148.1713926 Hartree

|   |             |             |             |
|---|-------------|-------------|-------------|
| C | -5.40881000 | 1.21302800  | -1.58085200 |
| C | -3.93125400 | 1.55888700  | -1.69454700 |
| C | -3.35377400 | 1.69435800  | -0.27705300 |
| C | -4.96596800 | 0.25663700  | 0.71254700  |
| C | -5.60980200 | 0.01404600  | -0.65731100 |
| H | -3.43415900 | 0.71360800  | -2.20727400 |
| H | -5.92653100 | 2.08158000  | -1.12406600 |
| H | -5.50640800 | 1.08420400  | 1.21216400  |
| H | -5.10304800 | -0.85899300 | -1.11884500 |
| H | -3.68005300 | 2.65033800  | 0.17573100  |
| O | -3.59246100 | 0.59083100  | 0.54976500  |
| S | -1.49264500 | 1.75960700  | -0.31677500 |
| O | -1.16895700 | 2.46389200  | -1.65087600 |
| O | -3.76837800 | 2.75954900  | -2.40184900 |
| H | -2.80231400 | 2.91302100  | -2.42471900 |
| O | -5.93031900 | 0.93772100  | -2.86186900 |
| H | -6.81160600 | 0.56177700  | -2.71232900 |
| O | -7.00210300 | -0.19591300 | -0.56217700 |
| H | -7.13101100 | -0.83718500 | 0.16203800  |
| C | -4.97939200 | -0.98072000 | 1.60034500  |
| H | -4.51172600 | -0.73511300 | 2.57055400  |
| H | -4.36872100 | -1.76414000 | 1.12031700  |
| O | -6.32989300 | -1.39388200 | 1.76017600  |
| H | -6.34441900 | -2.28035900 | 2.14524300  |
| O | -1.06509400 | 2.51140800  | 0.91028300  |
| I | 0.85858700  | 0.69732300  | -2.26316000 |
| C | 2.28990200  | -0.85324800 | -1.98253000 |
| C | -0.54474000 | -0.53418100 | -0.73297800 |
| C | 3.54442900  | -0.49553900 | -1.48368100 |
| C | 1.93957700  | -2.17861200 | -2.24891700 |
| C | -1.50592700 | -1.32194300 | -1.36567900 |
| C | 0.07152000  | -0.90817900 | 0.45781700  |

|   |             |             |             |
|---|-------------|-------------|-------------|
| C | 4.47512700  | -1.50990400 | -1.24501200 |
| H | 3.77738300  | 0.55633400  | -1.29042500 |
| C | 2.87756500  | -3.18074700 | -1.99684200 |
| H | 0.95371100  | -2.43834700 | -2.63611900 |
| C | -1.91536200 | -2.49517400 | -0.73332800 |
| H | -1.94195800 | -1.03432200 | -2.32210200 |
| C | -0.35182800 | -2.08654100 | 1.07576500  |
| H | 0.84397300  | -0.29390100 | 0.92095200  |
| C | 4.14055700  | -2.84543300 | -1.49525200 |
| H | 5.46404000  | -1.25519900 | -0.86035800 |
| H | 2.62428000  | -4.22249800 | -2.19787600 |
| H | -2.67630400 | -3.11761600 | -1.20813300 |
| C | -1.35120800 | -2.87396100 | 0.49201500  |
| H | 0.10044400  | -2.38507300 | 2.02245900  |
| C | 5.13145100  | -3.93378500 | -1.17264600 |
| C | -1.85873800 | -4.10759400 | 1.18015300  |
| F | 5.03456100  | -4.32365300 | 0.11518300  |
| F | 6.40039300  | -3.53019100 | -1.36072100 |
| F | 4.94117700  | -5.03053400 | -1.92641900 |
| F | -3.06940900 | -3.89848800 | 1.75250000  |
| F | -1.03799800 | -4.52693200 | 2.15699500  |
| F | -2.02269200 | -5.13266900 | 0.32180500  |
| S | 3.11850100  | 3.47815800  | -0.10473800 |
| O | 3.35665800  | 2.60221000  | -1.33859100 |
| C | 2.33756800  | 2.43200000  | 1.17513700  |
| H | 2.98400200  | 1.55135200  | 1.28625000  |
| H | 2.32302900  | 3.00462500  | 2.11397700  |
| H | 1.31403800  | 2.15600900  | 0.89102400  |
| C | 1.66521800  | 4.50805300  | -0.49617200 |
| H | 0.81420400  | 3.87057400  | -0.77184600 |
| H | 1.42384400  | 5.12646600  | 0.38033500  |
| H | 1.96467200  | 5.14690300  | -1.33767800 |

7t

-1728.7080039 Hartree

|   |             |             |             |
|---|-------------|-------------|-------------|
| C | 0.05603100  | -3.00198000 | 1.48924800  |
| C | 1.09437900  | -1.95876700 | 1.09632000  |
| C | 1.14248200  | -1.88065000 | -0.44241100 |
| C | -1.07285100 | -2.68051000 | -0.74000400 |
| C | -1.27044700 | -2.75316100 | 0.77740600  |
| H | 0.75052300  | -0.98299900 | 1.49357700  |
| H | 0.43436300  | -3.99147800 | 1.16016700  |
| H | -0.73535300 | -3.66981100 | -1.10289400 |
| H | -1.66056300 | -1.77091400 | 1.11601900  |

|   |             |             |             |
|---|-------------|-------------|-------------|
| H | 1.68936500  | -2.75592700 | -0.84421100 |
| O | -0.09505200 | -1.68766400 | -1.04859600 |
| S | 2.16671700  | -0.45662400 | -1.00383100 |
| O | 3.36903200  | -0.44640000 | -0.13485400 |
| O | 2.34207200  | -2.32953500 | 1.61917600  |
| H | 2.99185400  | -1.68478300 | 1.28489400  |
| O | -0.12275500 | -2.97414000 | 2.88620100  |
| H | -0.89264500 | -3.53559100 | 3.06621800  |
| O | -2.13259900 | -3.80363800 | 1.15318400  |
| H | -2.90644800 | -3.74788600 | 0.56141400  |
| C | -2.33188800 | -2.25922200 | -1.48585600 |
| H | -2.12026600 | -2.23308900 | -2.56947400 |
| H | -2.59997100 | -1.23673100 | -1.16411600 |
| O | -3.35380200 | -3.19372900 | -1.17287200 |
| H | -4.20234000 | -2.85392800 | -1.48751800 |
| O | 2.31751600  | -0.54062500 | -2.46229300 |
| C | 1.17314900  | 0.97828800  | -0.60716100 |
| C | 1.43510100  | 1.67936300  | 0.57005000  |
| C | 0.16024300  | 1.35898300  | -1.49178900 |
| C | 0.65010000  | 2.79198400  | 0.87709300  |
| H | 2.24280800  | 1.36236100  | 1.23014300  |
| C | -0.62031600 | 2.46779000  | -1.17497500 |
| H | -0.01327300 | 0.79227400  | -2.40579200 |
| H | 0.83450300  | 3.35341500  | 1.79321700  |
| C | -0.37300600 | 3.17931000  | 0.00675600  |
| H | -1.42311400 | 2.77804700  | -1.84521500 |
| C | -1.19785000 | 4.40638900  | 0.30906500  |
| F | -1.17325000 | 4.72445600  | 1.61308600  |
| F | -2.48450700 | 4.23821900  | -0.04283400 |
| F | -0.74438700 | 5.47877200  | -0.36886300 |

## B

-866.4305566 Hartree

|   |             |             |             |
|---|-------------|-------------|-------------|
| I | -0.01233600 | 2.90101500  | 0.00000000  |
| C | 0.00735900  | 0.77713100  | 0.00000000  |
| C | 0.01525600  | 0.08999200  | 1.21780400  |
| C | 0.01525600  | 0.08999200  | -1.21780400 |
| C | 0.02889300  | -1.30587200 | 1.21253900  |
| H | 0.01360400  | 0.63028400  | 2.16508100  |
| C | 0.02889300  | -1.30587200 | -1.21253900 |
| H | 0.01360400  | 0.63028400  | -2.16508100 |
| H | 0.04077000  | -1.84860800 | 2.15899300  |
| H | 0.04077000  | -1.84860800 | -2.15899300 |
| C | 0.03431900  | -2.00376300 | 0.00000000  |

|   |             |             |             |
|---|-------------|-------------|-------------|
| C | -0.00547800 | -3.50835700 | 0.00000000  |
| F | 0.59684300  | -4.02921700 | -1.08425800 |
| F | -1.27259400 | -3.97357000 | 0.00000000  |
| F | 0.59684300  | -4.02921700 | 1.08425800  |

## References:

- [1] Zeng, H.; Li, Y.; Wu, R.; Liu, D.; Zhang, Y.; Xu, S.; Niu, D. Carbohydrate-DNA conjugation enabled by glycosyl radicals generated from glycosyl sulfinates. *Org. Lett.* **2023**, doi.org/10.1021/acs.orglett.3c00833.
- [2] Chen, Q.; Kong, F. ; Stereoselective glycosylation using fully benzylated pyrimidin-2-yl 1-thio-13-o-glycopyranosides *Carbohydrate Research* **1995**, 272 149-157.
- [3] Ming, X.-X.; Tian, Z.-Y.; Zhang, C.-P. Base-mediated O-arylation of alcohols and phenols by triarylsulfonium triflates. *Chem. Asian J.* **2019**, 14, 3370-3379.
- [4] Duong, H. A.; Gilligan, R. E.; Cooke, M. L.; Phipps, R. J.; Gaunt, M. J. Copper(II)-catalyzed meta-selective direct arylation of alpha-aryl carbonyl compounds. *Angew. Chem., Int. Ed.* **2011**, 50, 463-466.
- [5] Lucchetti, N.; Scalone, M.; Fantasia, S.; Muniz, K. Sterically congested 2,6-disubstituted anilines from direct C-N bond formation at an Iodine(III) center. *Angew. Chem., Int. Ed.* **2016**, 55, 13335-13339.
- [6] Guan, Y.; Townsend, S. D. Metal-free synthesis of unsymmetrical organoselenides and selenoglycosides. *Org. Lett.* **2017**, 19, 5252-5255.
- [7] Zhou, J.; Bao, Z.; Wu, P.; Chen, C. The preparation and application of diaryliodonium salts derived from gemfibrozil and gemfibrozil methyl ester. *Synthesis* **2022**, 54, 1388-1394.
- [8] Frisch, M. J.; Trucks, G. W.; Schlegel, H. B.; Scuseria, G. E.; Robb, M. A.; Cheeseman, J. R.; Scalmani, G.; Barone, V.; Petersson, G. A.; Nakatsuji, H.; Li, X.; Caricato, M.; Marenich, A. V.; Bloino, J.; Janesko, B. G.; Gomperts, R.; Mennucci, B.; Hratchian, H. P.; Ortiz, J. V.; Izmaylov, A. F.; Sonnenberg, J. L.; Williams; Ding, F.; Lipparini, F.; Egidi, F.; Goings, J.; Peng, B.; Petrone, A.; Henderson, T.; Ranasinghe, D.; Zakrzewski, V. G.; Gao, J.; Rega, N.; Zheng, G.; Liang, W.; Hada, M.; Ehara, M.; Toyota, K.; Fukuda, R.; Hasegawa, J.; Ishida, M.; Nakajima, T.; Honda, Y.; Kitao, O.; Nakai, H.; Vreven, T.; Throssell, K.; Montgomery Jr., J. A.; Peralta, J. E.; Ogliaro, F.; Bearpark, M. J.; Heyd, J. J.; Brothers, E. N.; Kudin, K. N.; Staroverov, V. N.; Keith, T. A.; Kobayashi, R.; Normand, J.; Raghavachari, K.; Rendell, A. P.; Burant, J. C.; Iyengar, S. S.; Tomasi, J.; Cossi, M.; Millam, J. M.; Klene, M.; Adamo, C.; Cammi, R.; Ochterski, J. W.; Martin, R. L.; Morokuma, K.; Farkas, O.; Foresman, J. B.; Fox, D. J. *Gaussian 16 Rev. C.01*, Wallingford, CT, 2016.
- [9] Stephens, P. J.; Devlin, F. J.; Chabalowski, C. F.; Frisch, M. J., Ab Initio Calculation of Vibrational Absorption and Circular Dichroism Spectra Using Density Functional Force Fields. *The Journal of Physical Chemistry* **1994**, 98 (45), 11623-11627.
- [10] Grimme, S.; Ehrlich, S.; Goerigk, L., Effect of the damping function in dispersion corrected density functional theory. *Journal of Computational Chemistry* **2011**, 32 (7), 1456-1465.



- [11] Weigend, F.; Ahlrichs, R., Balanced basis sets of split valence, triple zeta valence and quadruple zeta valence quality for H to Rn: Design and assessment of accuracy. *Physical Chemistry Chemical Physics* **2005**, *7* (18), 3297-3305.
- [12] Weigend, F., Accurate Coulomb-fitting basis sets for H to Rn. *Physical Chemistry Chemical Physics* **2006**, *8* (9), 1057-1065.
- [13] Peterson, K. A.; Figgen, D.; Goll, E.; Stoll, H.; Dolg, M., Systematically convergent basis sets with relativistic pseudopotentials. II. Small-core pseudopotentials and correlation consistent basis sets for the post-d group 16–18 elements. *The Journal of Chemical Physics* **2003**, *119* (21), 11113-11123.
- [14] Tomasi, J.; Mennucci, B.; Cammi, R., Quantum Mechanical Continuum Solvation Models. *Chemical Reviews* **2005**, *105* (8), 2999-3094.
- [15] Neese, F., The ORCA program system. *WIREs Computational Molecular Science* **2012**, *2* (1), 73-78.
- [16] Neese, F., Software update: the ORCA program system, version 4.0. *WIREs Computational Molecular Science* **2018**, *8* (1), e1327.
- [17] Neese, F.; Wennmohs, F.; Becker, U.; Riplinger, C., The ORCA quantum chemistry program package. *The Journal of Chemical Physics* **2020**, *152* (22).
- [18] Neese, F., Software update: The ORCA program system—Version 5.0. *WIREs Computational Molecular Science* **2022**, *12* (5), e1606.
- [19] Neese, F.; Wennmohs, F.; Hansen, A.; Becker, U., Efficient, approximate and parallel Hartree–Fock and hybrid DFT calculations. A ‘chain-of-spheres’ algorithm for the Hartree–Fock exchange. *Chemical Physics* **2009**, *356* (1), 98-109.
- [20] Mardirossian, N.; Head-Gordon, M.,  $\omega$ B97M-V: A combinatorially optimized, range-separated hybrid, meta-GGA density functional with VV10 nonlocal correlation. *J Chem Phys* **2016**, *144* (21), 214110.
- [21] Zheng, J.; Xu, X.; Truhlar, D. G., Minimally augmented Karlsruhe basis sets. *Theoretical Chemistry Accounts* **2011**, *128* (3), 295-305.
- [22] Stoychev, G. L.; Auer, A. A.; Neese, F., Automatic Generation of Auxiliary Basis Sets. *Journal of Chemical Theory and Computation* **2017**, *13* (2), 554-562.
- [23] Marenich, A. V.; Cramer, C. J.; Truhlar, D. G., Universal Solvation Model Based on Solute Electron Density and on a Continuum Model of the Solvent Defined by the Bulk Dielectric Constant and Atomic Surface Tensions. *The Journal of Physical Chemistry B* **2009**, *113* (18), 6378-6396.
- [24] Otlyotov, A. A.; Minenkov, Y., Gas-phase thermochemistry of noncovalent ligand–alkali metal ion clusters: An impact of low frequencies. *Journal of Computational Chemistry* **2023**, *44* (22), 1807-1816.
- [25] Kesharwani, M. K.; Brauer, B.; Martin, J. M. L., Frequency and Zero-Point Vibrational Energy Scale Factors for Double-Hybrid Density Functionals (and Other Selected Methods): Can

- Anharmonic Force Fields Be Avoided? *The Journal of Physical Chemistry A* **2015**, *119* (9), 1701-1714.
- [26] Lu, T.; Chen, Q., Shermo: A general code for calculating molecular thermochemistry properties. *Computational and Theoretical Chemistry* **2021**, *1200*, 113249.
- [27] Hirshfeld, F. L., Bonded-atom fragments for describing molecular charge densities. *Theoretica chimica acta* **1977**, *44* (2), 129-138.
- [28] Mayer, I., Charge, bond order and valence in the AB initio SCF theory. *Chemical Physics Letters* **1983**, *97* (3), 270-274.
- [29] Lu, T.; Chen, F., Multiwfn: A multifunctional wavefunction analyzer. *Journal of Computational Chemistry* **2012**, *33* (5), 580-592.
- [30] Legault, C. Y. *CYLview20*, Université de Sherbrooke: Quebec, Montreal, Canada, 2020.

## Characterization data

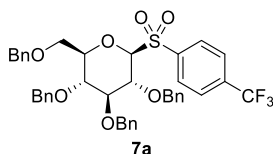

**(2R,3R,4S,5R,6S)-3,4,5-tris(benzyloxy)-2-((benzyloxy)methyl)-6-((4-(trifluoromethyl)phenyl)sulfonyl)tetrahydro-2H-pyran**

**7a** was prepared according to General procedure B as a white solid using PE/EA (5:1) as the eluent (63.4 mg, 86% yield).

**<sup>1</sup>H NMR (400 MHz, CDCl<sub>3</sub>)** δ 8.08 (d, *J* = 8.1 Hz, 2H), 7.67 (d, *J* = 8.2 Hz, 2H), 7.47-7.24 (m, 18H), 7.21-7.19 (m, 2H), 5.09 (d, *J* = 9.7 Hz, 1H), 5.00-4.78 (m, 4H), 4.60 (d, *J* = 10.9 Hz, 1H), 4.49-4.35 (m, 3H), 4.12 (t, *J* = 9.1 Hz, 1H), 3.79 (t, 8.9 Hz, 1H) 3.66 (t, *J* = 9.4 Hz, 1H), 3.59 (dd, *J* = 11.1, 4.6 Hz, 1H), 3.52-3.49 (m, 1H), 3.40-3.36 (m, 1H) ppm.

**<sup>19</sup>F NMR (376 MHz, CDCl<sub>3</sub>)** δ -63.03 ppm.

**<sup>13</sup>C NMR (101 MHz, CDCl<sub>3</sub>)** δ 140.80, 138.13, 137.80, 137.72, 137.44, 135.51(q, *J* = 33.3 Hz), 130.44, 128.70, 128.62, 128.58, 128.56, 128.54, 128.13, 128.11, 128.08, 127.98, 127.94, 127.84, 127.74, 125.84(q, *J* = 4.0 Hz), 123.26(q, *J* = 274.7 Hz), 91.22, 86.20, 79.55, 77.48, 76.88, 76.06, 75.59, 75.24, 73.58, 68.48 ppm.

**IR (thin film, cm<sup>-1</sup>):** 3201, 2924, 2323, 2286, 2050, 1561, 1322, 1258, 1160, 1060, 754, 697, 636, 497, 456, 422.

**[α]<sub>D</sub><sup>25</sup>** = +11.7 (c = 0.24, CHCl<sub>3</sub>).

**HRMS (ESI-TOF):** calculated for C<sub>41</sub>H<sub>39</sub>F<sub>3</sub>O<sub>7</sub>SNa<sup>+</sup> [M+Na]<sup>+</sup>: 755.2261, found: 755.2260.

**m. p.:** 111.9-113.2°C.

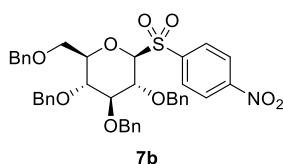

**(2R,3R,4S,5R,6S)-3,4,5-tris(benzyloxy)-2-((benzyloxy)methyl)-6-((4-nitrophenyl)sulfonyl)tetrahydro-2H-pyran**

**7b** was prepared according to General procedure B as a white solid using PE/EA (5:1) as the eluent (69.2 mg, 97% yield).

**<sup>1</sup>H NMR (400 MHz, CDCl<sub>3</sub>)** δ 8.18 (d, *J* = 8.7 Hz, 2H), 8.10 (d, *J* = 8.8 Hz, 2H), 7.47-7.15 (m, 20H), 5.06 (d, *J* = 9.8 Hz, 1H), 4.99-4.78 (m, 4H), 4.58 (d, *J* = 10.9 Hz, 1H), 4.46 (d, *J* = 9.3 Hz, 1H), 4.38 (d, *J* = 2.1 Hz, 2H), 4.13 (t, *J* = 9.1 Hz, 1H), 3.78 (t, *J* = 8.9 Hz, 1H), 3.63 (t, *J* = 9.4 Hz, 1H), 3.57-3.48 (m, 2H), 3.41-3.35 (m, 1H) ppm.

**<sup>13</sup>C NMR (101 MHz, CDCl<sub>3</sub>)** δ 150.97, 142.87, 138.07, 137.65, 137.62, 137.32, 131.24, 128.73,

128.67, 128.64, 128.62, 128.60, 128.24, 128.18, 128.16, 128.01, 127.79, 127.76, 123.81, 91.29, 86.15, 79.56, 77.37, 76.89, 76.10, 75.66, 75.31, 73.57, 68.59 ppm.

**IR (thin film, cm<sup>-1</sup>):** 3184, 2924, 2323, 2285, 2198, 2161, 2050, 2024, 1979, 1533, 1348, 1247, 1158, 1106, 855, 736, 647, 484, 428.

**[α]<sub>D</sub><sup>25</sup>** = +13.6 (c = 0.14, CHCl<sub>3</sub>).

**HRMS (ESI-TOF):** calculated for C<sub>40</sub>H<sub>39</sub>NO<sub>9</sub>SNa<sup>+</sup> [M+Na]<sup>+</sup>: 732.2238, found: 732.2242.

**m. p.:** 48.2-48.9°C.

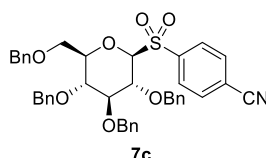

**4-(((2S,3R,4S,5R,6R)-3,4,5-tris(benzyloxy)-6-((benzyloxy)methyl)tetrahydro-2H-pyran-2-yl)sulfonyl)benzonitrile**

**7c** was prepared according to General procedure B as a white solid using PE/EA (5:1) as the eluent (65.3 mg, 94% yield).

**<sup>1</sup>H NMR (400 MHz, CDCl<sub>3</sub>)** δ 8.02 (d, *J* = 8.1 Hz, 2H), 7.60 (d, *J* = 8.1 Hz, 2H), 7.45-7.15 (m, 20H), 5.06 (d, *J* = 9.8 Hz, 1H), 4.98-4.78 (m, 4H), 4.59 (d, *J* = 10.9 Hz, 1H), 4.46-4.32 (m, 3H), 4.11 (t, *J* = 9.1 Hz, 1H), 3.78 (t, *J* = 8.9 Hz, 1H), 3.66-3.46 (m, 3H), 3.42-3.34 (m, 1H) ppm.

**<sup>13</sup>C NMR (101 MHz, CDCl<sub>3</sub>)** δ 141.35, 138.07, 137.75, 137.64, 137.35, 132.40, 130.47, 128.71, 128.67, 128.66, 128.62, 128.58, 128.20, 128.14, 127.99, 127.85, 127.75, 117.63, 117.29, 91.23, 86.15, 79.49, 77.40, 76.92, 76.08, 75.63, 75.28, 73.56, 68.63 ppm.

**IR (thin film, cm<sup>-1</sup>):** 3214, 2925, 2323, 2283, 2209, 2185, 2164, 2050, 1979, 1566, 1364, 1258, 1053, 855, 753, 644, 487, 456, 424.

**[α]<sub>D</sub><sup>25</sup>** = +13.3 (c = 0.12, CHCl<sub>3</sub>).

**HRMS (ESI-TOF):** calculated for C<sub>41</sub>H<sub>39</sub>NO<sub>7</sub>SNa<sup>+</sup> [M+Na]<sup>+</sup>: 712.2339, found: 712.2341.

**m. p.:** 48.5-49.6°C.

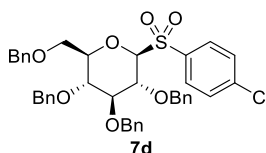

**(2R,3R,4S,5R,6S)-3,4,5-tris(benzyloxy)-2-((benzyloxy)methyl)-6-((4-chlorophenyl)sulfonyl)tetrahydro-2H-pyran**

**7d** was prepared according to General procedure B as a colorless syrup using PE/EA (5:1) as the eluent (59.0 mg, 84% yield).

**<sup>1</sup>H NMR (400 MHz, CDCl<sub>3</sub>)** δ 7.90 (d, *J* = 8.6 Hz, 2H), 7.49-7.41 (m, 4H), 7.40-7.27 (m, 16H), 7.22 (dd, *J* = 7.1, 2.5 Hz, 2H), 5.12 (d, *J* = 9.7 Hz, 1H), 4.98 (d, *J* = 11.0 Hz, 1H), 4.95-4.80 (m, 3H),

4.62 (d,  $J = 11.0$  Hz, 1H), 4.45-4.39 (m, 3H), 4.12 (t,  $J = 9.1$  Hz, 1H), 3.80 (t,  $J = 9.0$  Hz, 1H), 3.70-3.51 (m, 3H), 3.40 (ddd,  $J = 9.8, 4.6, 1.9$  Hz, 1H) ppm.

$^{13}\text{C}$  NMR (101 MHz,  $\text{CDCl}_3$ )  $\delta$  140.84, 138.17, 137.90, 137.74, 137.50, 135.62, 131.29, 129.11, 128.75, 128.60, 128.56, 128.52, 128.09, 128.05, 127.91, 127.74, 127.72, 91.18, 86.24, 79.56, 77.57, 76.94, 76.03, 75.57, 75.21, 73.56, 68.63 ppm.

IR (thin film,  $\text{cm}^{-1}$ ): 2943, 2866, 2323, 2165, 2050, 1980, 1647, 1623, 1510, 1642, 1442, 1381, 1247, 1190, 1106, 1076, 981, 884, 793, 755, 695, 573, 444.

$[\alpha]_{\text{D}}^{25} = +10.9$  ( $c = 0.11$ ,  $\text{CHCl}_3$ ).

HRMS (ESI-TOF): calculated for  $\text{C}_{40}\text{H}_{39}\text{ClO}_7\text{SNa}^+$   $[\text{M}+\text{Na}]^+$ : 721.1997, found: 721.1998.

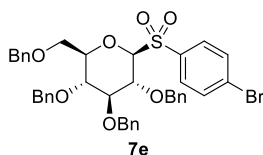

**(2R,3R,4S,5R,6S)-3,4,5-tris(benzyloxy)-2-((benzyloxy)methyl)-6-((4-bromophenyl)sulfonyl)tetrahydro-2H-pyran**

**7e** was prepared according to General procedure B as a white solid using PE/EA (5:1) as the eluent (65.0 mg, 87% yield).

$^1\text{H}$  NMR (400 MHz,  $\text{CDCl}_3$ )  $\delta$  7.81 (d,  $J = 8.6$  Hz, 2H), 7.55 (d,  $J = 8.5$  Hz, 2H), 7.47-7.24 (m, 18H), 7.23-7.18 (m, 2H), 5.09 (d,  $J = 9.7$  Hz, 1H), 5.00-4.78 (m, 4H), 4.60 (d,  $J = 10.9$  Hz, 1H), 4.46-4.37 (m, 3H), 4.10 (t,  $J = 9.1$  Hz, 1H), 3.78 (t,  $J = 9.0$  Hz, 1H), 3.68-3.50 (m, 3H), 3.39 (ddd,  $J = 9.8, 4.6, 1.9$  Hz, 1H) ppm.

$^{13}\text{C}$  NMR (101 MHz,  $\text{CDCl}_3$ )  $\delta$  138.18, 137.91, 137.75, 137.50, 136.18, 132.12, 131.35, 129.57, 128.76, 128.62, 128.61, 128.58, 128.54, 128.11, 128.07, 127.94, 127.92, 127.79, 127.74, 91.20, 86.25, 79.59, 77.56, 76.95, 76.05, 75.58, 75.24, 73.59, 68.63 ppm.

IR (thin film,  $\text{cm}^{-1}$ ): 2943, 2866, 2323, 2166, 2050, 1980, 1647, 1623, 1568, 1462, 1442, 1381, 1247, 1106, 1076, 981, 920, 884, 793, 695, 602, 573, 444.

$[\alpha]_{\text{D}}^{25} = +9.1$  ( $c = 0.11$ ,  $\text{CHCl}_3$ ).

HRMS (ESI-TOF): calculated for  $\text{C}_{40}\text{H}_{39}\text{BrO}_7\text{SNa}^+$   $[\text{M}+\text{Na}]^+$ : 765.1492, found: 765.1495.

m. p.: 51.9-52.8°C.

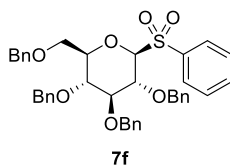

**(2R,3R,4S,5R,6S)-3,4,5-tris(benzyloxy)-2-((benzyloxy)methyl)-6-(phenylsulfonyl)tetrahydro-2H-pyran**

**7f** was prepared according to General procedure B as a white solid using PE/EA (5:1) as the eluent (58.0 mg, 87% yield).

**<sup>1</sup>H NMR (400 MHz, CDCl<sub>3</sub>)** δ 8.01-7.95 (m, 2H), 7.64-7.54 (m, 1H), 7.51-7.08 (m, 22H), 5.14 (d, *J* = 9.7 Hz, 1H), 5.00-4.78 (m, 4H), 4.60 (d, *J* = 10.9 Hz, 1H), 4.48-4.32 (m, 3H), 4.13 (t, *J* = 9.1 Hz, 1H), 3.79 (t, *J* = 9.0 Hz, 1H), 3.69-3.49 (m, 3H), 3.40-3.34 (m, 1H) ppm.

**<sup>13</sup>C NMR (101 MHz, CDCl<sub>3</sub>)** δ 138.26, 138.11, 137.82, 137.63, 137.23, 134.01, 129.78, 128.81, 128.62, 128.56, 128.53, 128.47, 128.09, 128.06, 128.03, 127.90, 127.78, 127.76, 127.69, 91.19, 86.35, 79.76, 77.69, 77.03, 76.05, 75.58, 75.21, 73.56, 68.66 ppm.

**IR (thin film, cm<sup>-1</sup>):** 2944, 2866, 2323, 2050, 1980, 1653, 1624, 1570, 1510, 1462, 1443, 1382, 1248, 1192, 1106, 1045, 980, 921, 884, 822, 783, 686, 610, 454.

**[α]<sub>D</sub><sup>25</sup>** = +15.0 (c = 0.10, CHCl<sub>3</sub>).

**HRMS (ESI-TOF):** calculated for C<sub>40</sub>H<sub>40</sub>O<sub>7</sub>SNa<sup>+</sup> [M+Na]<sup>+</sup>: 687.2387, found: 687.2386.

**m. p.:** 156.0-156.7°C.

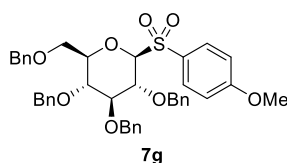

**(2R,3R,4S,5R,6S)-3,4,5-tris(benzyloxy)-2-((benzyloxy)methyl)-6-((4-methoxyphenyl)sulfonyl)tetrahydro-2H-pyran**

**7g** was prepared according to General procedure B as a white solid using PE/EA (5:1) as the eluent (31.0 mg, 52% yield).

**<sup>1</sup>H NMR (400 MHz, CDCl<sub>3</sub>)** δ 7.88 (d, *J* = 8.8 Hz, 2H), 7.45 (d, *J* = 7.2 Hz, 2H), 7.39-7.17 (m, 18H), 6.89 (d, *J* = 8.8 Hz, 2H), 5.12 (d, *J* = 9.7 Hz, 1H), 5.00-4.78 (m, 4H), 4.59 (d, *J* = 10.9 Hz, 1H), 4.42-4.34 (m, 3H), 4.07 (t, *J* = 9.1 Hz, 1H), 3.80-3.75 (m, 4H), 3.64-3.55 (m, 3H), 3.41-3.37 (m, 1H) ppm.

**<sup>13</sup>C NMR (101 MHz, CDCl<sub>3</sub>)** δ 164.11, 138.31, 138.17, 137.85, 137.71, 132.05, 128.83, 128.63, 128.60, 128.58, 128.54, 128.50, 128.12, 128.05, 127.90, 127.78, 127.75, 114.08, 91.28, 86.41, 79.76, 77.86, 77.11, 76.06, 75.56, 75.23, 73.63, 68.86, 55.69 ppm.

**IR (thin film, cm<sup>-1</sup>):** 3194, 2924, 2323, 2285, 2208, 2164, 2049, 1981, 1577, 1497, 1363, 1260, 1149, 1084, 751, 630, 512, 471, 452, 424.

**[α]<sub>D</sub><sup>25</sup>** = +10.0 (c = 0.16, CHCl<sub>3</sub>).

**HRMS (ESI-TOF):** calculated for C<sub>41</sub>H<sub>42</sub>O<sub>8</sub>SNa<sup>+</sup> [M+Na]<sup>+</sup>: 717.2493, found: 717.2493.

**m. p.:** 128.2 -129.7°C.

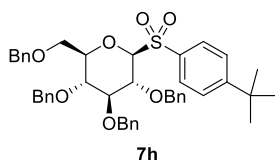

**(2R,3R,4S,5R,6S)-3,4,5-tris(benzyloxy)-2-((benzyloxy)methyl)-6-((4-(tert-butyl)phenyl)sulfonyl)tetrahydro-2H-pyran**

**7h** was prepared according to General procedure B as a white solid using PE/EA (5:1) as the eluent (62.0 mg, 86% yield).

**<sup>1</sup>H NMR (400 MHz, CDCl<sub>3</sub>)** δ 7.87 (d, *J* = 8.2 Hz, 2H), 7.46 – 7.40 (m, 4H), 7.39 – 7.23 (m, 16H), 7.20 - 7.14 (m, 2H), 5.09 (d, *J* = 9.7 Hz, 1H), 4.96 – 4.73 (m, 4H), 4.58 (d, *J* = 10.9 Hz, 1H), 4.45 – 4.33 (m, 3H), 4.07 (t, *J* = 9.1 Hz, 1H), 3.76 (t, *J* = 8.9 Hz, 1H), 3.67 – 3.50 (m, 3H), 3.41 – 3.34 (m, 1H), 1.28 (s, 9H) ppm.

**<sup>13</sup>C NMR (101 MHz, CDCl<sub>3</sub>)** δ 157.97, 138.28, 138.18, 137.87, 137.72, 134.25, 129.66, 128.76, 128.63, 128.58, 128.54, 128.10, 128.03, 127.92, 127.83, 127.81, 125.88, 91.27, 86.42, 79.83, 77.76, 77.06, 76.09, 75.52, 75.22, 73.69, 68.62, 35.34, 31.14 ppm.

**IR (thin film, cm<sup>-1</sup>):** 3204, 2961, 2644, 2323, 2285, 2190, 2162, 2050, 2068, 2023, 1980, 1574, 1365, 1259, 1053, 456, 424.

**[α]<sub>D</sub><sup>25</sup>** = +7.3 (*c* = 0.11, CHCl<sub>3</sub>).

**HRMS (ESI-TOF):** calculated for C<sub>44</sub>H<sub>48</sub>O<sub>7</sub>SNa<sup>+</sup> [*M*+Na]<sup>+</sup>: 743.3013, found: 743.3015.

**m. p.:** 48.7-49.3°C.

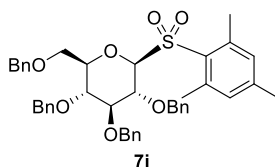

**(2R,3R,4S,5R,6S)-3,4,5-tris(benzyloxy)-2-((benzyloxy)methyl)-6-(mesitylsulfonyl)tetrahydro-2H-pyran**

**7i** was prepared according to General procedure B as a white solid using PE/EA (5:1) as the eluent (62.0 mg, 89% yield).

**<sup>1</sup>H NMR (400 MHz, CDCl<sub>3</sub>)** δ 7.51-7.44 (m, 2H), 7.41-7.27 (m, 14H), 7.22-7.16 (m, 4H), 6.93 (s, 2H), 5.22 (d, *J* = 9.6 Hz, 1H), 5.00 (d, *J* = 11.1 Hz, 1H), 4.92 (d, *J* = 11.1 Hz, 1H), 4.88-4.80 (m, 2H), 4.61 (d, *J* = 10.9 Hz, 1H), 4.54 (d, *J* = 9.2 Hz, 1H), 4.34-4.24 (m, 2H), 4.18 (d, *J* = 11.8 Hz, 1H), 3.84 (t, *J* = 9.0 Hz, 1H), 3.66 (t, *J* = 9.4 Hz, 1H), 3.54 (d, *J* = 3.5 Hz, 2H), 3.41 (dt, *J* = 9.8, 3.2 Hz, 1H), 2.73 (s, 6H), 2.25 (s, 3H) ppm.

**<sup>13</sup>C NMR (101 MHz, CDCl<sub>3</sub>)** δ 143.50, 141.62, 138.45, 138.11, 137.86, 132.08, 132.02, 128.94, 128.58, 128.54, 128.47, 128.40, 128.09, 127.99, 127.80, 127.69, 127.64, 91.39, 86.55, 79.98, 77.52, 77.10, 75.96, 75.58, 75.21, 73.61, 69.07, 23.26, 21.10 ppm.

**IR (thin film, cm<sup>-1</sup>):** 2942, 2865, 2323, 2184, 2161, 2050, 1979, 1644, 1623, 1568, 1509, 1441, 1380, 1328, 1106, 1051, 979, 919, 883, 751, 695, 666, 579, 511, 443.

**[α]<sub>D</sub><sup>25</sup>** = +14.1 (c = 0.29, CHCl<sub>3</sub>)

**HRMS (ESI-TOF):** calculated for C<sub>43</sub>H<sub>46</sub>O<sub>7</sub>SNa<sup>+</sup> [M+Na]<sup>+</sup>: 729.2856, found: 729.2858.

**m. p.:** 152.7-153.7°C

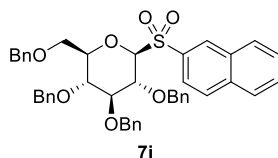

**(2R,3R,4S,5R,6S)-3,4,5-tris(benzyloxy)-2-((benzyloxy)methyl)-6-(naphthalen-2-ylsulfonyl)tetrahydro-2H-pyran**

**7j** was prepared according to General procedure B as a yellow solid using PE/EA (4:1) as the eluent (50.0 mg, 70% yield).

**<sup>1</sup>H NMR (400 MHz, CDCl<sub>3</sub>)** δ 8.59 (d, *J* = 1.8 Hz, 1H), 8.00-7.83 (m, 4H), 7.67 (t, *J* = 7.5 Hz, 1H), 7.60 (t, *J* = 7.5 Hz, 1H), 7.52-7.46 (m, 2H), 7.38-7.24 (m, 14H), 7.19 (dd, *J* = 7.0, 2.8 Hz, 2H), 7.12 (dd, *J* = 6.6, 2.7 Hz, 2H), 5.19 (d, *J* = 9.7 Hz, 1H), 4.98 (d, *J* = 11.0 Hz, 1H), 4.90 (dd, *J* = 10.4, 3.6 Hz, 2H), 4.82 (d, *J* = 10.8 Hz, 1H), 4.57 (dd, *J* = 23.4, 10.1 Hz, 2H), 4.36 (d, *J* = 11.9 Hz, 1H), 4.27 (d, *J* = 11.9 Hz, 1H), 4.19 (t, *J* = 9.1 Hz, 1H), 3.82 (t, *J* = 8.9 Hz, 1H), 3.66 (t, *J* = 9.4 Hz, 1H), 3.59 (dd, *J* = 11.4, 4.5 Hz, 1H), 3.51 (dd, *J* = 11.4, 1.8 Hz, 1H), 3.38 (ddd, *J* = 9.8, 4.6, 1.8 Hz, 1H) ppm.

**<sup>13</sup>C NMR (101 MHz, CDCl<sub>3</sub>)** δ 138.28, 138.02, 137.81, 137.69, 135.63, 134.38, 132.13, 131.67, 129.64, 129.42, 128.86, 128.80, 128.63, 128.57, 128.56, 128.45, 128.11, 128.08, 128.06, 128.04, 127.91, 127.77, 127.70, 127.62, 127.57, 124.58, 91.45, 86.40, 79.86, 77.79, 77.04, 76.07, 75.62, 75.23, 73.63, 68.71 ppm.

**IR (thin film, cm<sup>-1</sup>):** 3218, 2959, 2323, 2182, 2166, 2049, 1979, 1567, 1362, 1259, 1054, 754, 643, 512, 473, 449, 438.

**[α]<sub>D</sub><sup>25</sup>** = +8.6 (c = 0.22, CHCl<sub>3</sub>).

**HRMS (ESI-TOF):** calculated for C<sub>44</sub>H<sub>42</sub>O<sub>7</sub>SNa<sup>+</sup> [M+Na]<sup>+</sup>: 737.2543, found: 737.2545.

**m. p.:** 52.6-53.4°C.

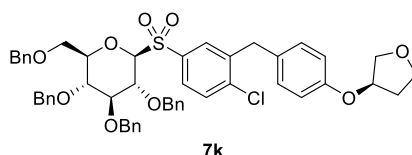

**(2R,3R,4S,5R,6S)-3,4,5-tris(benzyloxy)-2-((benzyloxy)methyl)-6-((4-chloro-3-(4-((R)-tetrahydrofuran-3-yl)oxy)benzyl)phenyl)sulfonyl)tetrahydro-2H-pyran**



**7k** was prepared according to General procedure B as a white solid using PE/EA (2:1) as the eluent (55.0 mg, 63% yield).

**<sup>1</sup>H NMR (400 MHz, CDCl<sub>3</sub>)** δ 7.74 (m, 2H), 7.43-7.13 (m, 21H), 7.03 (d, *J* = 8.2 Hz, 2H), 6.75 (d, *J* = 8.3 Hz, 2H), 5.02 - 4.83 (m, 3H), 4.82 - 4.74 (m, 3H), 4.56 (d, *J* = 10.9 Hz, 1H), 4.41-4.28 (m, 3H), 4.06-3.83 (m, 7H), 3.75 (t, *J* = 8.9 Hz, 1H), 3.66-3.49 (m, 3H), 3.37 (m, 1H), 2.26-2.00 (m, 2H) ppm.

**<sup>13</sup>C NMR (101 MHz, CDCl<sub>3</sub>)** δ 156.29, 140.72, 140.35, 138.18, 137.94, 137.74, 137.47, 135.77, 131.66, 130.34, 130.12, 130.10, 129.10, 128.74, 128.63, 128.58, 128.54, 128.10, 128.09, 128.07, 127.93, 127.89, 127.73, 127.69, 115.64, 91.16, 86.25, 79.69, 77.61, 77.34, 76.96, 76.03, 75.55, 75.23, 73.54, 73.22, 68.66, 67.28, 38.35, 33.06 ppm.

**IR (thin film, cm<sup>-1</sup>):** 2955, 2923, 2853, 2323, 2161, 2050, 1979, 1508, 1454, 1376, 1332, 1258, 1153, 1087, 1014, 795, 755, 697, 659, 559, 461.

**[α]<sub>D</sub><sup>25</sup>** = +9.3 (c = 0.14, CHCl<sub>3</sub>).

**HRMS (ESI-TOF):** calculated for C<sub>51</sub>H<sub>51</sub>ClO<sub>9</sub>SNa<sup>+</sup> [M+Na]<sup>+</sup>: 897.2835, found: 897.2839.

**m. p.:** 60.3-61.4°C.

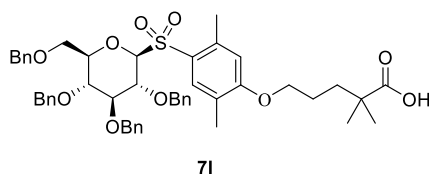

**5-(2,5-dimethyl-4-(((2S,3R,4S,5R,6R)-3,4,5-tris(benzyloxy)-6-((benzyloxy)methyl)tetrahydro-2H-pyran-2-yl)sulfonyl)phenoxy)-2,2-dimethylpentanoic acid**

**7l** was prepared according to General procedure B as a white solid using PE/EA (3:1) as the eluent (31.0 mg, 39% yield).

**<sup>1</sup>H NMR (400 MHz, CDCl<sub>3</sub>)** δ 7.75 (s, 1H), 7.46-7.39 (m, 2H), 7.35-7.22 (m, 15H), 7.17-7.12 (m, 4H), 6.54 (s, 1H), 5.12 (d, *J* = 9.8 Hz, 1H), 4.98-4.75 (m, 4H), 4.55 (d, *J* = 10.9 Hz, 1H), 4.44 (d, *J* = 9.3 Hz, 1H), 4.26 (d, *J* = 11.8 Hz, 1H), 4.21-4.10 (m, 2H), 3.87-3.73 (m, 3H), 3.61-3.48 (m, 3H), 3.43-3.36 (m, 1H), 2.64 (s, 3H), 2.13 (s, 3H), 1.83-1.66 (m, 4H), 1.25 (s, 6H) ppm.

**<sup>13</sup>C NMR (101 MHz, CDCl<sub>3</sub>)** δ 161.11, 140.19, 138.39, 138.19, 137.86, 133.59, 128.81, 128.63, 128.59, 128.52, 128.44, 128.13, 128.05, 127.99, 127.89, 127.77, 127.74, 127.71, 126.56, 124.78, 114.02, 91.77, 86.55, 80.19, 77.89, 77.36, 76.03, 75.53, 75.24, 73.65, 69.06, 68.27, 41.92, 36.85, 25.22, 25.01, 21.18, 15.72 ppm.

**IR (thin film, cm<sup>-1</sup>):** 3278, 2923, 2161, 2049, 1979, 1631, 1497, 1453, 1375, 1257, 1088, 1045, 793, 753, 697, 664, 528, 465.

**[α]<sub>D</sub><sup>25</sup>** = +7.0 (c = 0.10, CHCl<sub>3</sub>)

**HRMS (ESI-TOF):** calculated for C<sub>49</sub>H<sub>56</sub>O<sub>10</sub>SNa<sup>+</sup> [M+Na]<sup>+</sup>: 859.3486, found: 859.3483.

**m. p.:** 63.0-64.8°C.

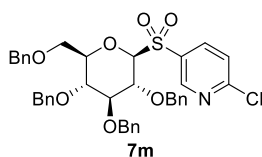

**2-chloro-5-(((2S,3R,4S,5R,6R)-3,4,5-tris(benzyloxy)-6-((benzyloxy)methyl)tetrahydro-2H-pyran-2-yl)sulfonyl)pyridine**

**7m** was prepared according to General procedure B as a colorless syrup using PE/EA (4:1) as the eluent (47.0 mg, 67% yield).

**<sup>1</sup>H NMR (400 MHz, CDCl<sub>3</sub>)** δ 8.90 (d, *J* = 2.4 Hz, 1H), 8.08 (dd, *J* = 8.4, 2.4 Hz, 1H), 7.44-7.21 (m, 19H), 7.18-7.15 (m, 2H), 5.05 (d, *J* = 9.7 Hz, 1H), 4.98-4.76 (m, 4H), 4.56 (d, *J* = 10.9 Hz, 1H), 4.41-4.38 (m, 3H), 4.11 (t, *J* = 9.1 Hz, 1H), 3.77 (t, *J* = 9.0 Hz, 1H), 3.65-3.47 (m, 3H), 3.41-3.36 (m, 1H) ppm.

**<sup>13</sup>C NMR (101 MHz, CDCl<sub>3</sub>)** δ 157.10, 150.95, 140.26, 138.11, 137.73, 137.64, 137.33, 132.70, 128.77, 128.68, 128.64, 128.62, 128.24, 128.18, 128.06, 128.01, 127.93, 127.76, 124.42, 91.42, 86.11, 79.57, 77.36, 76.90, 76.10, 75.71, 75.33, 73.68, 68.65 ppm.

**IR (thin film, cm<sup>-1</sup>):** 3063, 2922, 2323, 2162, 2050, 2036, 1979, 1566, 1496, 1451, 1359, 1336, 1258, 1163, 1088, 1026, 797, 773, 734, 696, 639, 577, 458.

**[α]<sub>D</sub><sup>25</sup> = +10.4** (c = 0.23, CHCl<sub>3</sub>).

**HRMS (ESI-TOF):** calculated for C<sub>39</sub>H<sub>38</sub>ClNO<sub>7</sub>S<sup>+</sup> [M+Na]<sup>+</sup>: 722.1950, found: 722.1952.

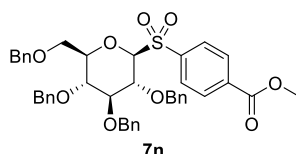

**Methyl 4-(((2S,3R,4S,5R,6R)-3,4,5-tris(benzyloxy)-6-((benzyloxy)methyl)tetrahydro-2H-pyran-2-yl)sulfonyl)benzoate**

**7n** was prepared according to General procedure B as a white solid using PE/EA (5:1) as the eluent (63.2 mg, 88% yield).

**<sup>1</sup>H NMR (400 MHz, CDCl<sub>3</sub>)** δ 8.12 (d, *J* = 8.4 Hz, 2H), 8.04 (d, *J* = 8.4 Hz, 2H), 7.48-7.42 (m, 2H), 7.41-7.27 (m, 14H), 7.24-7.18 (m, 4H), 5.11 (d, *J* = 9.7 Hz, 1H), 5.00-4.78 (m, 4H), 4.59 (d, *J* = 10.9 Hz, 1H), 4.47 (d, *J* = 9.4 Hz, 1H), 4.42-4.31 (m, 2H), 4.14 (t, *J* = 9.1 Hz, 1H), 3.96 (s, 3H), 3.79 (t, *J* = 9.0 Hz, 1H), 3.69-3.47 (m, 3H), 3.40-3.36 (m, 1H) ppm.

**<sup>13</sup>C NMR (101 MHz, CDCl<sub>3</sub>)** δ 165.59, 141.10, 138.17, 137.88, 137.72, 137.49, 135.00, 129.88, 129.86, 128.75, 128.61, 128.56, 128.53, 128.49, 128.09, 128.06, 127.91, 127.81, 127.72, 127.68, 91.22, 86.24, 79.74, 77.52, 76.91, 76.03, 75.60, 75.22, 73.56, 68.60, 52.73 ppm.

**IR (thin film, cm<sup>-1</sup>):** 3197, 2922, 2323, 2196, 2163, 2079, 2050, 2038, 1980, 1728, 1135, 1279, 1157, 1105, 734, 696, 633, 528, 501, 488, 457, 426.

$[\alpha]_D^{25} = +11.1$  ( $c = 0.35$ ,  $\text{CHCl}_3$ ).

**HRMS (ESI-TOF):** calculated for  $\text{C}_{42}\text{H}_{42}\text{O}_9\text{SNa}^+$   $[\text{M}+\text{Na}]^+$ : 745.2442, found: 745.2445.

**m. p.:** 43.2-45.1°C.

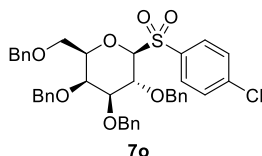

**(2R,3S,4S,5R,6S)-3,4,5-tris(benzyloxy)-2-((benzyloxy)methyl)-6-((4-chlorophenyl)sulfonyl)tetrahydro-2H-pyran**

**7o** was prepared according to General procedure B as a white solid using PE/EA (3:1) as the eluent (54.0 mg, 77% yield).

**$^1\text{H}$  NMR (400 MHz,  $\text{CDCl}_3$ )**  $\delta$  7.87 (d,  $J = 8.3$  Hz, 2H), 7.48 - 7.28 (m, 18H), 7.24 - 7.17 (m, 4H), 5.01 (d,  $J = 9.7$  Hz, 1H), 4.94 - 4.88 (m, 2H), 4.76 - 4.70 (m, 2H), 4.55 (d,  $J = 11.6$  Hz, 1H), 4.43 (d,  $J = 9.3$  Hz, 1H), 4.38 - 4.26 (m, 3H), 3.88 (d,  $J = 2.6$  Hz, 1H), 3.66 (dd,  $J = 9.2, 2.6$  Hz, 1H), 3.54 (t,  $J = 6.2$  Hz, 1H), 3.47 (d,  $J = 6.1$  Hz, 2H) ppm.

**$^{13}\text{C}$  NMR (101 MHz,  $\text{CDCl}_3$ )**  $\delta$  140.65, 138.43, 137.90, 137.84, 137.67, 135.62, 131.32, 129.03, 128.79, 128.65, 128.59, 128.48, 128.39, 128.03, 128.01, 127.99, 127.90, 127.84, 127.73, 92.01, 83.82, 78.07, 75.67, 74.51, 74.31, 73.65, 73.03, 72.97, 68.62 ppm.

**IR (thin film,  $\text{cm}^{-1}$ ):** 3221, 2923, 2323, 2285, 2185, 2166, 2050, 1979, 1572, 1365, 1258, 1089, 1053, 754, 632, 459, 449.

$[\alpha]_D^{25} = -7.6$  ( $c = 0.17$ ,  $\text{CHCl}_3$ )

**HRMS (ESI-TOF):** calculated for  $\text{C}_{40}\text{H}_{39}\text{ClO}_7\text{SNa}^+$   $[\text{M}+\text{Na}]^+$ : 721.1997, found: 721.1996.

**m. p.:** 89.4-90.7°C.

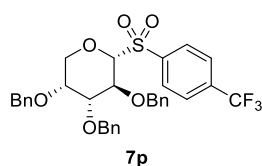

**(2R,3S,4R,5R)-3,4,5-tris(benzyloxy)-2-((4-(trifluoromethyl)phenyl)sulfonyl)tetrahydro-2H-pyran**

**7p** was prepared according to General procedure B as a white solid using PE/EA (5:1) as the eluent (53.5 mg, 87% yield).

**$^1\text{H}$  NMR (400 MHz,  $\text{CDCl}_3$ )**  $\delta$  8.08 (d,  $J = 8.1$  Hz, 2H), 7.73 (d,  $J = 8.2$  Hz, 2H), 7.43-7.28 (m, 15H), 4.97-4.88 (m, 2H), 4.68-4.57 (m, 4H), 4.47-4.35 (m, 2H), 4.12 (dd,  $J = 12.5, 3.0$  Hz, 1H), 3.73-3.62 (m, 2H), 3.28 (d,  $J = 12.3$  Hz, 1H) ppm.

**$^{19}\text{F}$  NMR (376 MHz,  $\text{CDCl}_3$ )**  $\delta$  -63.08 ppm.

**$^{13}\text{C}$  NMR (101 MHz,  $\text{CDCl}_3$ )**  $\delta$  141.16, 137.90, 137.78, 135.38 (q,  $J = 33.3$  Hz), 130.19, 128.58,

128.56, 128.54, 128.50, 128.01, 128.00, 127.93, 127.89, 127.85, 125.93 (q,  $J = 4.0$  Hz), 123.30 (q,  $J = 273.7$  Hz), 92.51, 80.95, 75.34, 73.79, 72.23, 71.71, 71.35, 67.07 ppm.

**IR (thin film,  $\text{cm}^{-1}$ ):** 2954, 2921, 2851, 2322, 2162, 2049, 1979, 1735, 1496, 1455, 1403, 1376, 1321, 1259, 1130, 1086, 1061, 1016, 798, 737, 697, 558.

$[\alpha]_{\text{D}}^{25} = -6.3$  ( $c = 0.16$ ,  $\text{CHCl}_3$ )

**HRMS (ESI-TOF):** calculated for  $\text{C}_{33}\text{H}_{31}\text{F}_3\text{O}_6\text{SNa}^+$   $[\text{M}+\text{Na}]^+$ : 635.1686, found: 635.1683.

**m. p.:** 160.0-160.8°C.

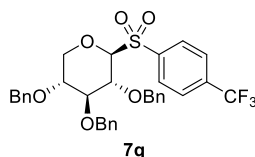

**(2S,3R,4S,5R)-3,4,5-tris(benzyloxy)-2-((4-(trifluoromethyl)phenyl)sulfonyl)tetrahydro-2H-pyran**

**7q** was prepared according to General procedure B as a white solid using PE/EA (5:1) as the eluent (39.0 mg, 64% yield)

**$^1\text{H}$  NMR (400 MHz,  $\text{CDCl}_3$ )**  $\delta$  8.05 (d,  $J = 8.1$  Hz, 2H), 7.78 (d,  $J = 8.2$  Hz, 2H), 7.43-7.25 (m, 15H), 5.02 (d,  $J = 9.9$  Hz, 1H), 4.96-4.84 (m, 3H), 4.68 (d,  $J = 11.8$  Hz, 1H), 4.58 (d,  $J = 11.8$  Hz, 1H), 4.43 (dd,  $J = 9.0, 1.6$  Hz, 1H), 4.12 (t,  $J = 8.9$  Hz, 1H), 4.00 (dd,  $J = 11.6, 5.0$  Hz, 1H), 3.74 (t,  $J = 8.7$  Hz, 1H), 3.69-3.63 (m, 1H), 3.22-3.17 (m, 1H) ppm.

**$^{19}\text{F}$  NMR (376 MHz,  $\text{CDCl}_3$ )**  $\delta$  -63.16 ppm.

**$^{13}\text{C}$  NMR (101 MHz,  $\text{CDCl}_3$ )**  $\delta$  141.00, 138.22, 137.78, 137.55, 135.65 (q,  $J = 33.3$  Hz), 130.15, 128.68, 128.61, 128.54, 128.19, 128.11, 127.97, 126.11 (q,  $J = 4.0$  Hz), 123.28 (q,  $J = 273.7$  Hz), 91.86, 85.13, 77.26, 76.59, 75.83, 75.58, 73.40, 68.13 ppm.

**IR (thin film,  $\text{cm}^{-1}$ ):** 2958, 2924, 2323, 2165, 2050, 2025, 1979, 1497, 1454, 1403, ,1321, 1259, 1215, 1134, 1084, 1061, 1016, 794, 753, 665, 459.

$[\alpha]_{\text{D}}^{25} = +10.6$  ( $c = 0.17$ ,  $\text{CHCl}_3$ )

**HRMS (ESI-TOF):** calculated for  $\text{C}_{33}\text{H}_{31}\text{F}_3\text{O}_6\text{SNa}^+$   $[\text{M}+\text{Na}]^+$ : 635.1686, found: 635.1685.

**m. p.:** 89.7-90.6°C.

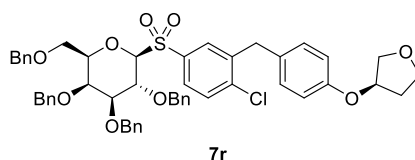

**(2R,3S,4S,5R,6S)-3,4,5-tris(benzyloxy)-2-((benzyloxy)methyl)-6-((4-chloro-3-(4-((S)-tetrahydrofuran-3-yl)oxy)benzyl)phenyl)sulfonyl)tetrahydro-2H-pyran**

**7r** was prepared according to General procedure B as a yellow solid using PE/EA (2:1) as the eluent (58.0 mg, 66% yield).

**<sup>1</sup>H NMR (400 MHz, CDCl<sub>3</sub>)** δ 7.74-7.71 (m, 2H), 7.49-7.27 (m, 17H), 7.20 (d, *J* = 7.1 Hz, 4H), 7.01 (d, *J* = 8.2 Hz, 2H), 6.72 (d, *J* = 8.3 Hz, 2H), 4.97-4.84 (m, 2H), 4.83-4.64 (m, 4H), 4.54 (d, *J* = 11.6 Hz, 1H), 4.39 (d, *J* = 9.3 Hz, 1H), 4.33-4.26 (m, 2H), 4.22 (t, *J* = 9.3 Hz, 1H), 4.06-3.76 (m, 7H), 3.63 (dd, *J* = 9.3, 2.5 Hz, 1H), 3.53 (t, *J* = 6.4 Hz, 1H), 3.49-3.36 (m, 2H), 2.16-2.03 (m, 2H) ppm.

**<sup>13</sup>C NMR (101 MHz, CDCl<sub>3</sub>)** δ 156.24, 140.44, 140.25, 138.47, 137.90, 137.80, 137.69, 135.46, 131.89, 130.39, 130.18, 129.92, 129.08, 128.75, 128.64, 128.58, 128.45, 128.40, 128.01, 127.99, 127.96, 127.84, 127.69, 127.67, 115.62, 91.85, 83.80, 77.85, 77.30, 75.59, 74.49, 74.28, 73.59, 73.19, 72.96, 72.89, 68.38, 67.26, 38.23, 33.04 ppm.

**IR (thin film, cm<sup>-1</sup>):** 2956, 2922, 2853, 2323, 2188, 2162, 2050, 1979, 1582, 1508, 1453, 1361, 1327, 1258, 1148, 1090, 1027, 796, 752, 696, 637, 582, 440.

**[α]<sub>D</sub><sup>25</sup>** = -0.8 (c = 0.12, CHCl<sub>3</sub>)

**HRMS (ESI-TOF):** calculated for C<sub>51</sub>H<sub>51</sub>ClO<sub>9</sub>SNa<sup>+</sup> [M+Na]<sup>+</sup>: 897.2835, found: 897.2838.

**m. p.:** 49.4-50.2°C.

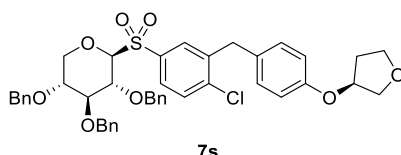

**(2S,3R,4S,5R)-3,4,5-tris(benzyloxy)-2-((4-chloro-3-(4-((S)-tetrahydrofuran-3-yl)oxy)benzyl)phenyl)sulfonyl)tetrahydro-2H-pyran**

**7s** was prepared according to General procedure B as a yellow solid using PE/EA (3:1) as the eluent (44.0 mg, 58% yield)

**<sup>1</sup>H NMR (400 MHz, CDCl<sub>3</sub>)** δ 7.71-7.69 (m, 2H), 7.51 (d, *J* = 8.4 Hz, 1H), 7.45-7.25 (m, 15H), 7.07 (d, *J* = 8.2 Hz, 2H), 6.78 (d, *J* = 8.2 Hz, 2H), 4.98-4.78 (m, 5H), 4.68 (d, *J* = 11.7 Hz, 1H), 4.58 (d, *J* = 11.6 Hz, 1H), 4.34 (d, *J* = 9.1 Hz, 1H), 4.10-3.94 (m, 7H), 3.91-3.86 (m, 1H), 3.71 (t, *J* = 8.6 Hz, 1H), 3.65-3.59 (m, 1H), 3.20-3.14 (m, 1H), 2.22-2.11 (m, 2H) ppm.

**<sup>13</sup>C NMR (101 MHz, CDCl<sub>3</sub>)** δ 156.32, 140.75, 140.55, 138.25, 137.82, 137.58, 135.82, 131.63, 130.40, 130.30, 130.13, 128.67, 128.62, 128.59, 128.51, 128.17, 128.06, 127.94, 115.67, 91.81, 85.15, 77.40, 77.34, 76.68, 75.79, 75.50, 73.37, 73.23, 68.02, 67.30, 38.39, 33.10 ppm.

**IR (thin film, cm<sup>-1</sup>):** 3218, 2924, 2645, 2323, 2283, 2162, 2049, 1980, 1561, 1365, 1259, 1090, 1050, 854, 625, 452, 429.

**[α]<sub>D</sub><sup>25</sup>** = +0.8 (c = 0.13, CHCl<sub>3</sub>).

**HRMS (ESI-TOF):** calculated for C<sub>43</sub>H<sub>43</sub>ClO<sub>8</sub>SNa<sup>+</sup> [M+Na]<sup>+</sup>: 777.2259, found: 777.2260.

**m. p.:** 58.5-60.1°C.

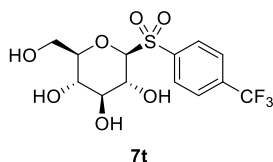

**(2R,3S,4S,5R,6S)-2-(hydroxymethyl)-6-((4-(trifluoromethyl)phenyl)sulfonyl)tetrahydro-2H-pyran-3,4,5-triol**

**7t** was prepared according to General procedure B as a white solid using DCM/MeOH (10:1) as the eluent (28.1 mg, 76% yield).

**<sup>1</sup>H NMR (400 MHz, DMSO-*d*<sub>6</sub>)** δ 8.11 (d, *J* = 8.1 Hz, 2H), 7.99 (d, *J* = 8.3 Hz, 2H), 5.51 (s, 1H), 5.29 (s, 1H), 5.13 (s, 1H), 4.56 (d, *J* = 9.4 Hz, 1H), 4.45 (s, 1H), 3.52 (d, *J* = 12.1 Hz, 1H), 3.43-3.37 (m, 2H), 3.27-3.16 (m, 2H), 3.04 (t, *J* = 9.3 Hz, 1H) ppm.

**<sup>19</sup>F NMR (376 MHz, DMSO-*d*<sub>6</sub>)** δ -61.64 ppm.

**<sup>13</sup>C NMR (101 MHz, DMSO-*d*<sub>6</sub>)** δ 141.71, 132.32 (q, *J* = 32.2 Hz) 130.33, 125.92 (q, *J* = 4.0 Hz) 123.52 (q, *J* = 273.7 Hz), 91.30, 81.36, 77.38, 69.89, 69.00, 60.46 ppm.

**IR (thin film, cm<sup>-1</sup>):** 3319, 2944, 2832, 2161, 2049, 1978, 1654, 1448, 1412, 1259, 1110, ,1020, 602.

**[α]<sub>D</sub><sup>29</sup>** = -64.2 (c = 0.68, MeOH).

**HRMS (ESI-TOF):** calculated for C<sub>13</sub>H<sub>15</sub>F<sub>3</sub>O<sub>7</sub>SNa<sup>+</sup> [M+Na]<sup>+</sup>: 395.0383, found: 395.0381.

**m. p.:** 39.0-40.1°C

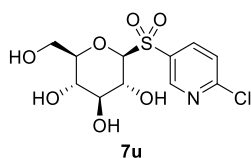

**(2S,3R,4S,5S,6R)-2-((6-chloropyridin-3-yl)sulfonyl)-6-(hydroxymethyl)tetrahydro-2H-pyran-3,4,5-triol**

**7u** was prepared according to General procedure B as a yellow solid using DCM/MeOH (10:1) as the eluent (13.0 mg, 38% yield).

**<sup>1</sup>H NMR (400 MHz, MeOD)** δ 8.89 (s, 1H), 8.33 (d, *J* = 8.5 Hz, 1H), 7.71 (d, *J* = 9.0 Hz, 1H), 4.54 (d, *J* = 9.5 Hz, 1H), 3.75 (d, *J* = 12.1 Hz, 1H), 3.68-3.59 (m, 2H), 3.43 (t, *J* = 9.0 Hz, 1H), 3.37 - 3.24 (m, 2H) ppm.

**<sup>13</sup>C NMR (101 MHz, MeOD)** δ 157.83, 151.91, 141.99, 134.42, 125.91, 93.06, 82.78, 78.88, 71.25, 70.50, 62.22 ppm.

**IR (thin film, cm<sup>-1</sup>):** 3338, 2950, 2839, 2161, 2050, 1644, 1407, 1111, 1013, 490.

**[α]<sub>D</sub><sup>29</sup>** = -73.8 (c = 0.39, MeOH).

**HRMS (ESI-TOF):** calculated for C<sub>11</sub>H<sub>14</sub>ClNO<sub>7</sub>SNa<sup>+</sup> [M+Na]<sup>+</sup>: 362.0072, found: 362.0070.

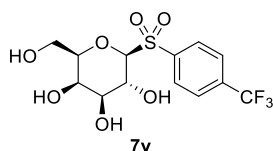

**(2R,3R,4S,5R,6S)-2-(hydroxymethyl)-6-((4-(trifluoromethyl)phenyl)sulfonyl)tetrahydro-2H-pyran-3,4,5-triol**

**7v** was prepared according to General procedure B as a yellow solid using DCM/MeOH (10:1) as the eluent (23.3 mg, 63% yield).

**<sup>1</sup>H NMR (400 MHz, MeOD)** δ 8.17 (d, *J* = 8.1 Hz, 2H), 7.93 (d, *J* = 8.2 Hz, 2H), 4.59 (s, 1H), 4.45 (d, *J* = 9.5 Hz, 1H), 3.92 (t, *J* = 9.3 Hz, 1H), 3.85 (d, *J* = 3.2 Hz, 1H), 3.66-3.60 (m, 2H), 3.59-3.50 (m, 2H) ppm.

**<sup>19</sup>F NMR (376 MHz, MeOD)** δ -64.66 ppm.

**<sup>13</sup>C NMR (101 MHz, MeOD)** δ 142.34, 136.35 (q, *J* = 33.3 Hz), 131.74, 127.01 (q, *J* = 4.0 Hz), 124.88 (q, *J* = 273.7 Hz), 93.76, 81.45, 75.63, 69.88, 68.12, 62.22 ppm.

**IR (thin film, cm<sup>-1</sup>):** 3363, 2479, 2219, 2071, 1324, 1119, 1062, 972, 818, 425.

**[α]<sub>D</sub><sup>29</sup>** = -137.7 (c = 0.39, MeOH)

**HRMS (ESI-TOF):** calculated for C<sub>13</sub>H<sub>15</sub>F<sub>3</sub>O<sub>6</sub>SNa<sup>+</sup> [M+Na]<sup>+</sup>: 395.0383, found: 395.0380.

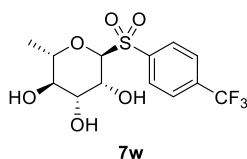

**(2S,3R,4R,5R,6S)-2-methyl-6-((4-(trifluoromethyl)phenyl)sulfonyl)tetrahydro-2H-pyran-3,4,5-triol**

**7w** was prepared according to General procedure B as a yellow solid using DCM/MeOH (10:1) as the eluent (16.0 mg, 45% yield).

**<sup>1</sup>H NMR (400 MHz, MeOD)** δ 8.14 (d, *J* = 8.1 Hz, 2H), 7.99 (d, *J* = 8.2 Hz, 2H), 4.92-4.88 (m, 1H), 4.65-4.61 (m, 1H), 4.29-4.22 (m, 1H), 4.02 (dd, *J* = 9.3, 3.6 Hz, 1H), 3.47 (t, *J* = 9.3 Hz, 1H), 1.18 (d, *J* = 6.1 Hz, 3H) ppm.

**<sup>19</sup>F NMR (376 MHz, MeOD)** δ -64.69 ppm.

**<sup>13</sup>C NMR (101 MHz, MeOD)** δ 142.60, 136.57 (q, *J* = 33.3 Hz), 130.94, 127.51 (q, *J* = 4.0 Hz), 124.82 (q, *J* = 273.7 Hz), 95.64, 75.22, 72.73, 67.43, 18.46 ppm.

**IR (thin film, cm<sup>-1</sup>):** 3331, 2945, 2834, 2050, 1979, 1654, 1448, 1406, 1111, 1018, 545.

**[α]<sub>D</sub><sup>29</sup>** = -121.5, (c = 0.12, MeOH)

**HRMS (ESI-TOF):** calculated for C<sub>13</sub>H<sub>15</sub>F<sub>3</sub>O<sub>6</sub>SNa<sup>+</sup> [M+Na]<sup>+</sup>: 379.0434, found: 379.0434.

**m. p.:** 174.2-174.7°C

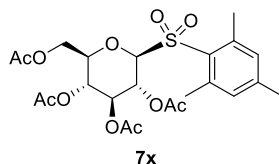

**(2R,3R,4S,5R,6S)-2-(acetoxymethyl)-6-(mesitylsulfonyl)tetrahydro-2H-pyran-3,4,5-triyl triacetate**

**7x** was prepared according to General procedure B as a yellow solid using PE/EA (3:1) as the eluent (16.0 mg, 31% yield).

**<sup>1</sup>H NMR (400 MHz, CDCl<sub>3</sub>)** δ 6.94 (s, 2H), 5.59 (t, *J* = 9.5 Hz, 1H), 5.32 (t, *J* = 9.4 Hz, 1H), 5.09 (t, *J* = 9.8 Hz, 1H), 4.56 (d, *J* = 9.7 Hz, 1H), 4.09 (dd, *J* = 12.5, 5.6 Hz, 1H), 3.92 (dd, *J* = 12.4, 2.4 Hz, 1H), 3.64 – 3.60 (m, 1H), 2.62 (s, 6H), 2.29 (s, 3H), 2.11 – 1.87 (m, 12H) ppm.

**<sup>13</sup>C NMR (101 MHz, CDCl<sub>3</sub>)** δ 170.39, 170.36, 169.27, 169.22, 144.19, 142.01, 132.23, 130.91, 88.48, 76.11, 73.52, 67.77, 67.08, 61.69, 23.14, 21.15, 20.81, 20.68, 20.60, 20.48 ppm.

**IR (thin film, cm<sup>-1</sup>):** 3564, 3130, 1744, 1602, 1366, 1317, 1220, 1150, 1062, 909, 594, 511.

**[α]<sub>D</sub><sup>25</sup>** = -12.7 (c = 0.15, CHCl<sub>3</sub>).

**HRMS (ESI-TOF):** calculated for C<sub>23</sub>H<sub>30</sub>O<sub>11</sub>SNa<sup>+</sup> [M+Na]<sup>+</sup>: 537.1397, found: 537.1401.

**m. p.:** 253.0 – 255.5°C

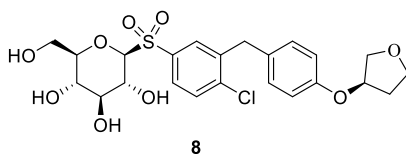

**(2S,3R,4S,5S,6R)-2-((4-chloro-3-(4-((R)-tetrahydrofuran-3-yl)oxy)benzyl)phenyl)sulfonyl)-6-(hydroxymethyl)tetrahydro-2H-pyran-3,4,5-triol**

**8** was prepared according to General procedure B as a yellow solid using DCM/MeOH (10:1) as the eluent (29.9 mg, 58% yield).

**<sup>1</sup>H NMR (400 MHz, MeOD)** δ 7.88 – 7.78 (m, 2H), 7.63 (dd, *J* = 8.4, 4.6 Hz, 1H), 7.13 (dd, *J* = 8.8, 3.1 Hz, 2H), 6.84 (dd, *J* = 8.6, 4.2 Hz, 2H), 5.01 – 4.94 (m, 1H), 4.40 (dt, *J* = 9.4, 2.2 Hz, 1H), 4.17 – 7.07 (m, 2H), 3.98- 3.80 (m, 4H), 3.73 – 3.63 (m, 1H), 3.62 – 3.45 (m, 2H), 3.43 – 3.36 (m, 1H), 3.27 (d, *J* = 5.4 Hz, 1H), 3.25 – 3.16 (m, 1H), 2.29 – 2.14 (m, 1H), 2.13 – 2.03 (m, 1H) ppm.

**<sup>13</sup>C NMR (101 MHz, MeOD)** δ 157.59, 141.89, 141.73, 136.93, 133.24, 132.13, 131.31, 131.12, 130.11, 116.70, 93.07, 82.74, 78.98, 78.59, 74.02, 71.39, 70.48, 68.13, 62.40, 39.07, 33.86 ppm.

**IR (thin film, cm<sup>-1</sup>):** 3372, 2923, 2853, 1508, 1464, 1308, 1241, 1150, 1090, 1043, 897, 757, 647.

**[α]<sub>D</sub><sup>25</sup>** = -7.3 (c = 0.15, CHCl<sub>3</sub>).

**HRMS (ESI-TOF):** calculated for C<sub>23</sub>H<sub>27</sub>ClO<sub>9</sub>SNa<sup>+</sup> [M+Na]<sup>+</sup>: 537.0957, found: 537.0951.

**m. p.:** 107.0 – 108.5°C



## NMR Spectra

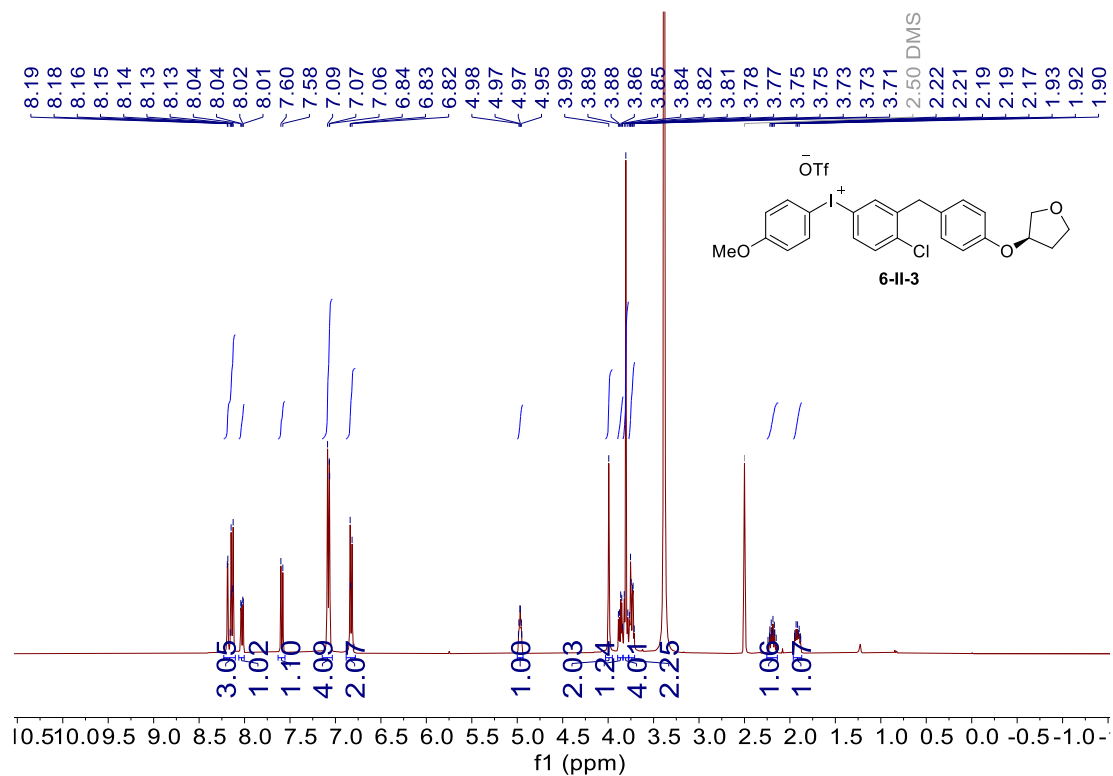

Figure S6. <sup>1</sup>H NMR (400 MHz, DMSO-*d*<sub>6</sub>) Spectra for compound 6-II-3

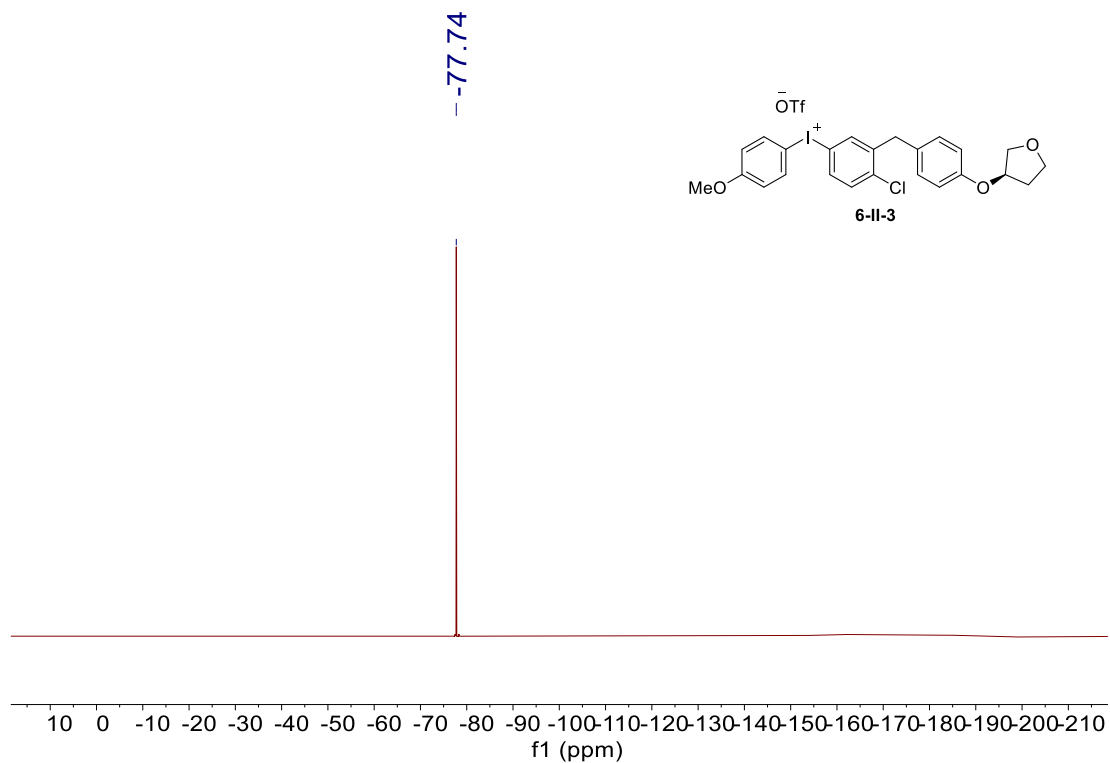

Figure S7. <sup>19</sup>F NMR (376 MHz, DMSO-*d*<sub>6</sub>) Spectra for compound 6-II-3

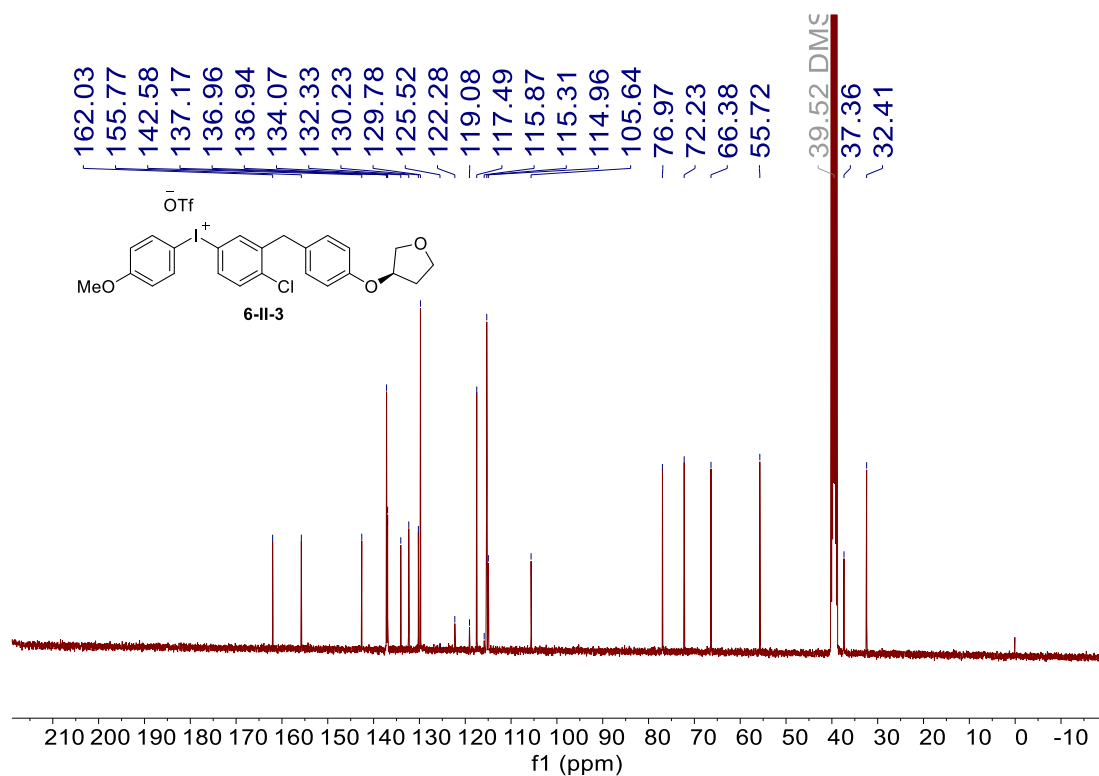

Figure S8. <sup>13</sup>C NMR (101 MHz, DMSO-*d*<sub>6</sub>) Spectra for compound 6-II-3

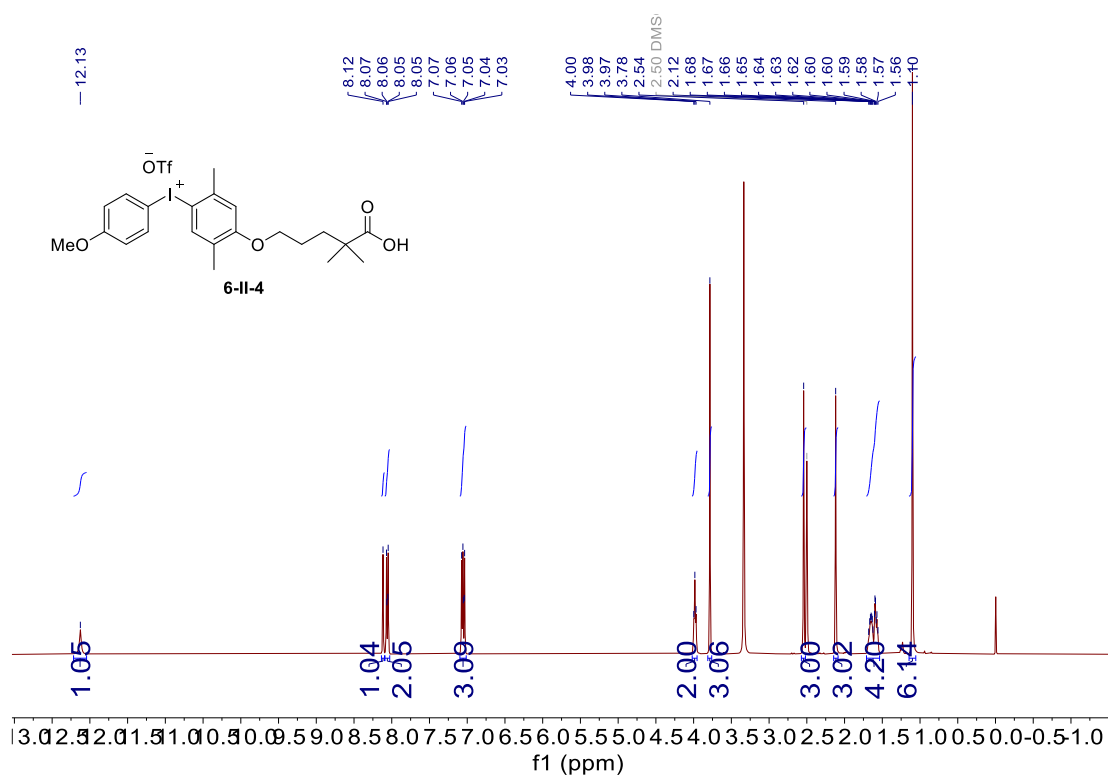

Figure S9. <sup>1</sup>H NMR (400 MHz, DMSO-*d*<sub>6</sub>) Spectra for compound 6-II-4

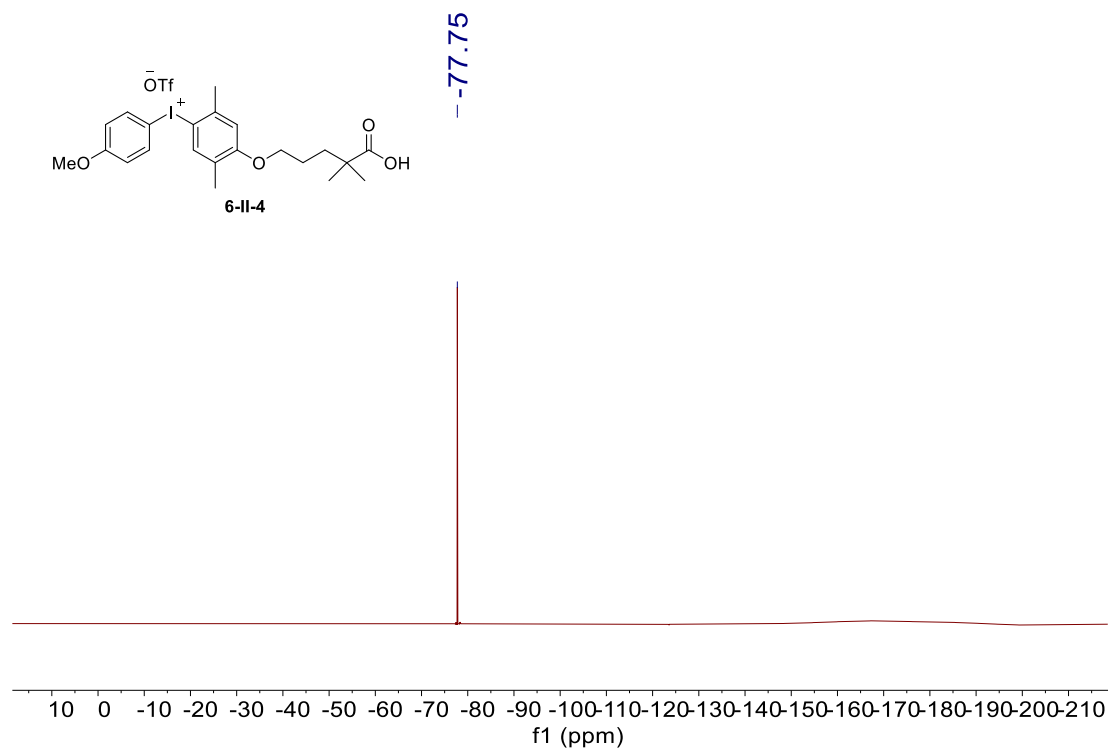

Figure S10.  $^{19}\text{F}$  NMR (376 MHz,  $\text{DMSO-}d_6$ ) Spectra for compound 6-II-4

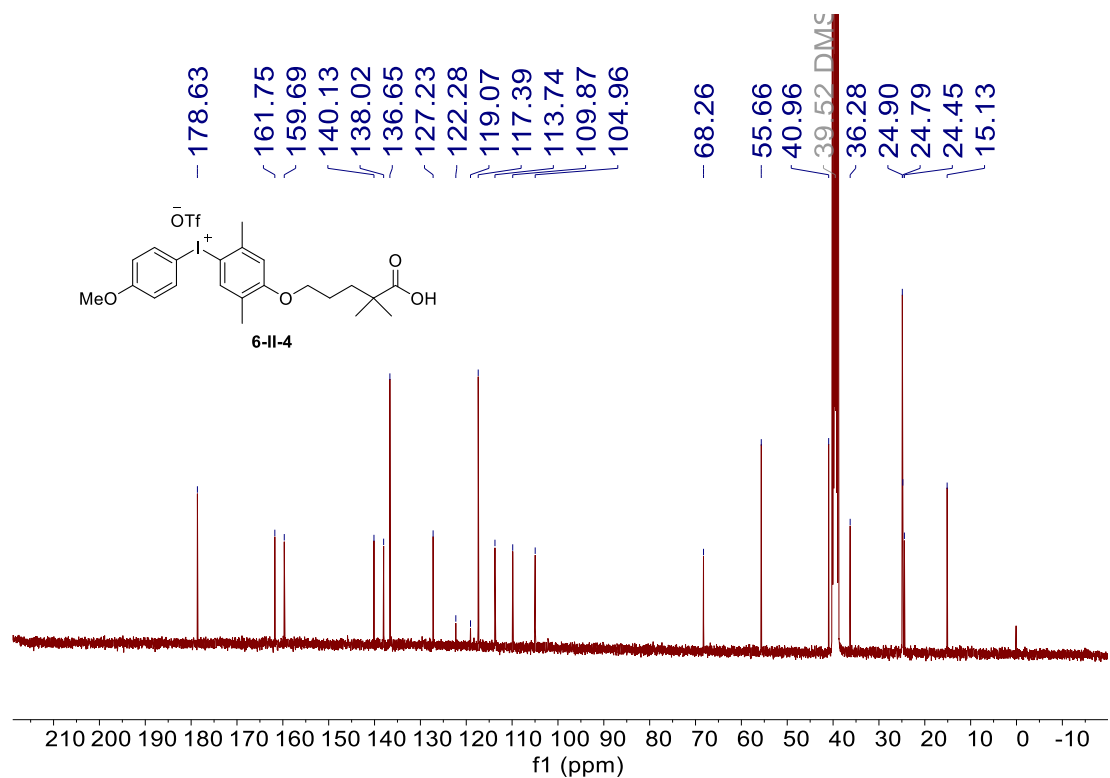

Figure S11.  $^{13}\text{C}$  NMR (101 MHz,  $\text{DMSO-}d_6$ ) Spectra for compound 6-II-4

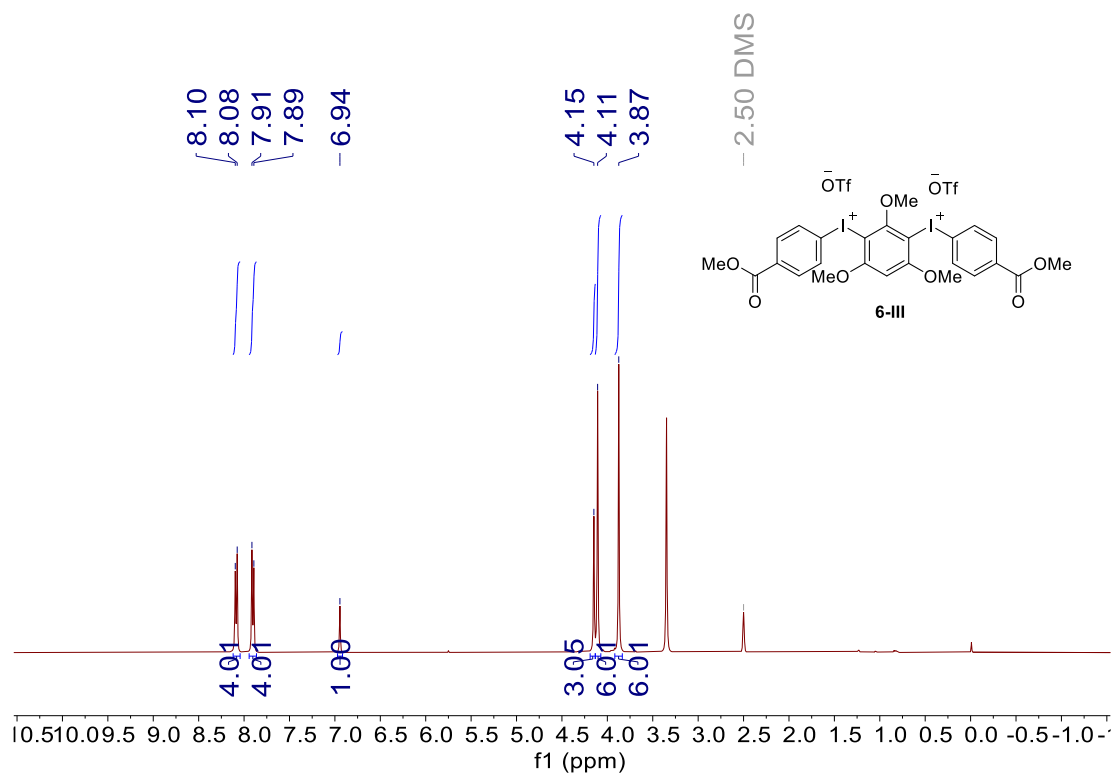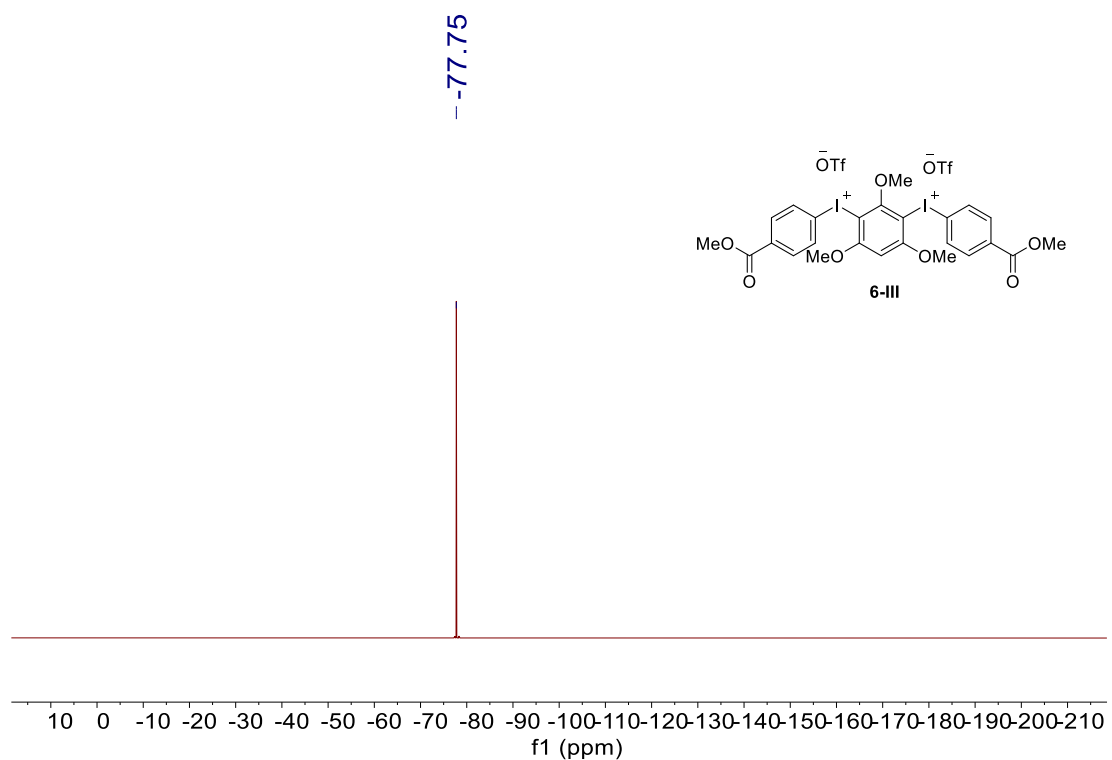

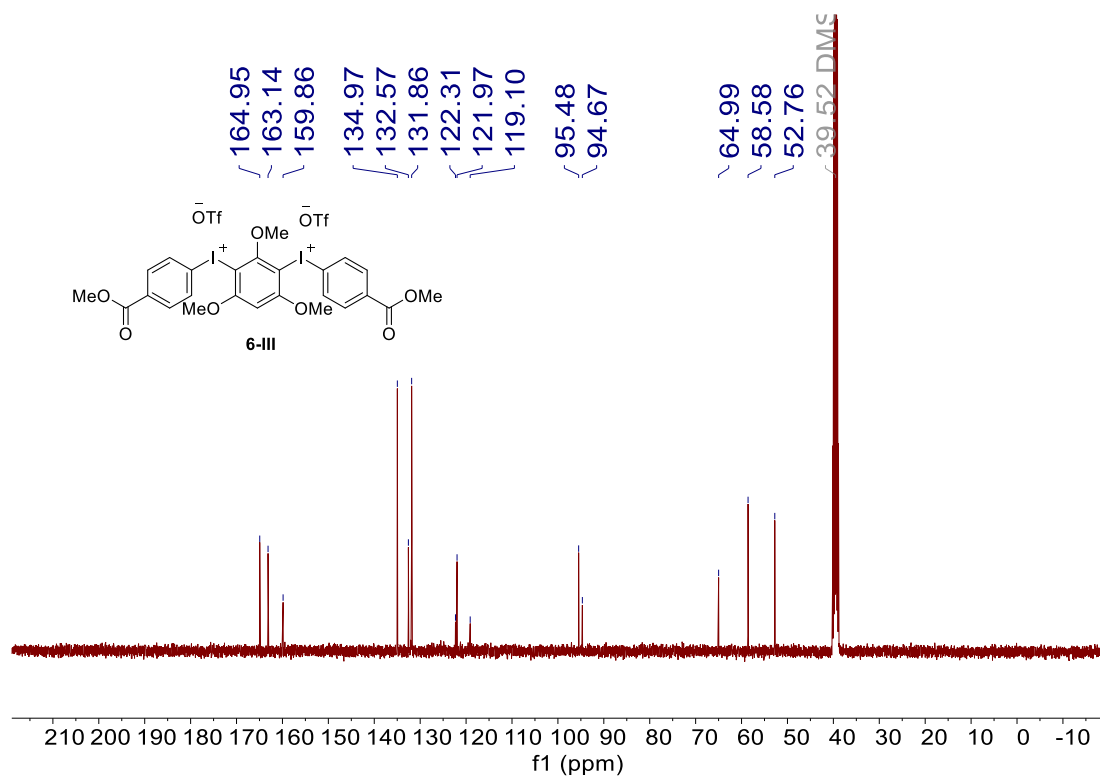

Figure S14.  $^{13}\text{C}$  NMR (101 MHz,  $\text{DMSO}-d_6$ ) Spectra for compound 6-III

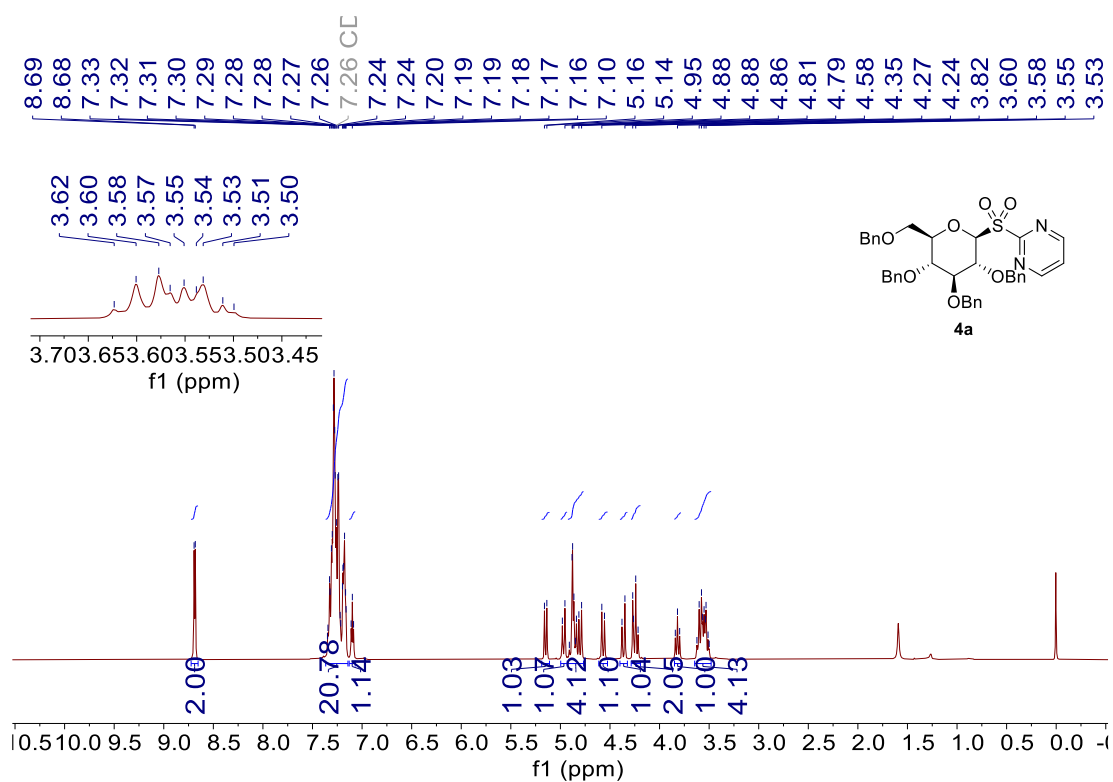

Figure S15.  $^1\text{H}$  NMR (400 MHz,  $\text{CDCl}_3$ ) Spectra for compound 4a

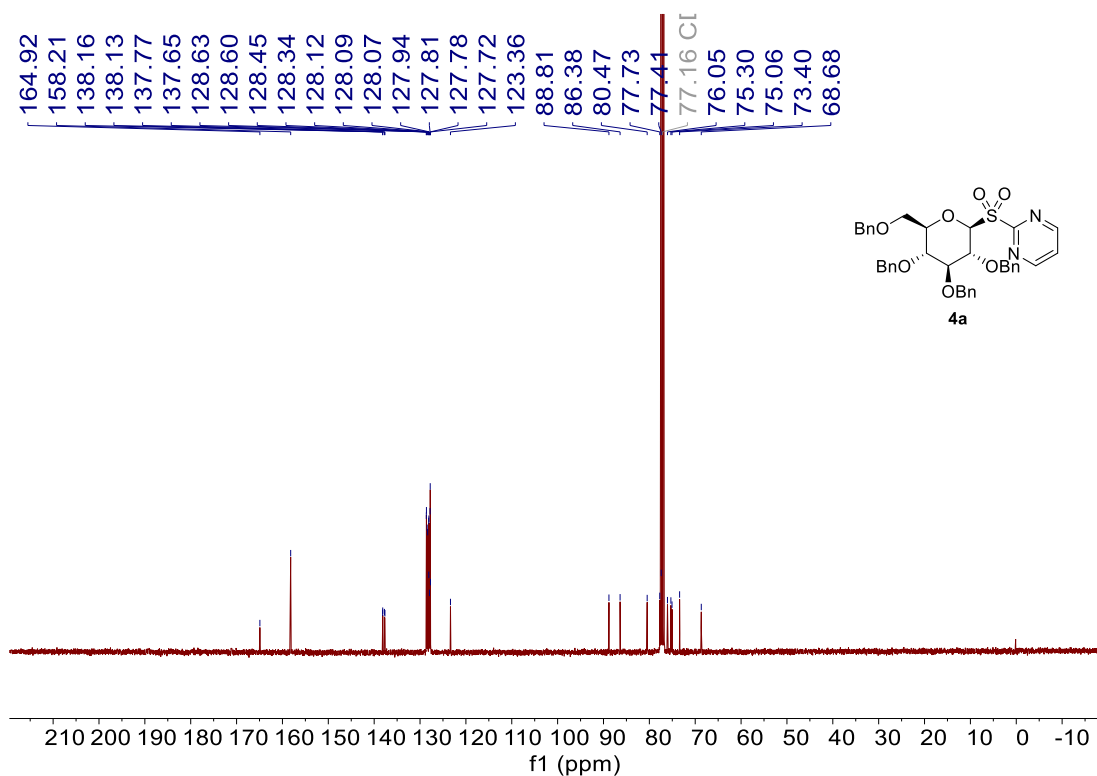

Figure S16. <sup>13</sup>C NMR (101 MHz, CDCl<sub>3</sub>) Spectra for compound 4a

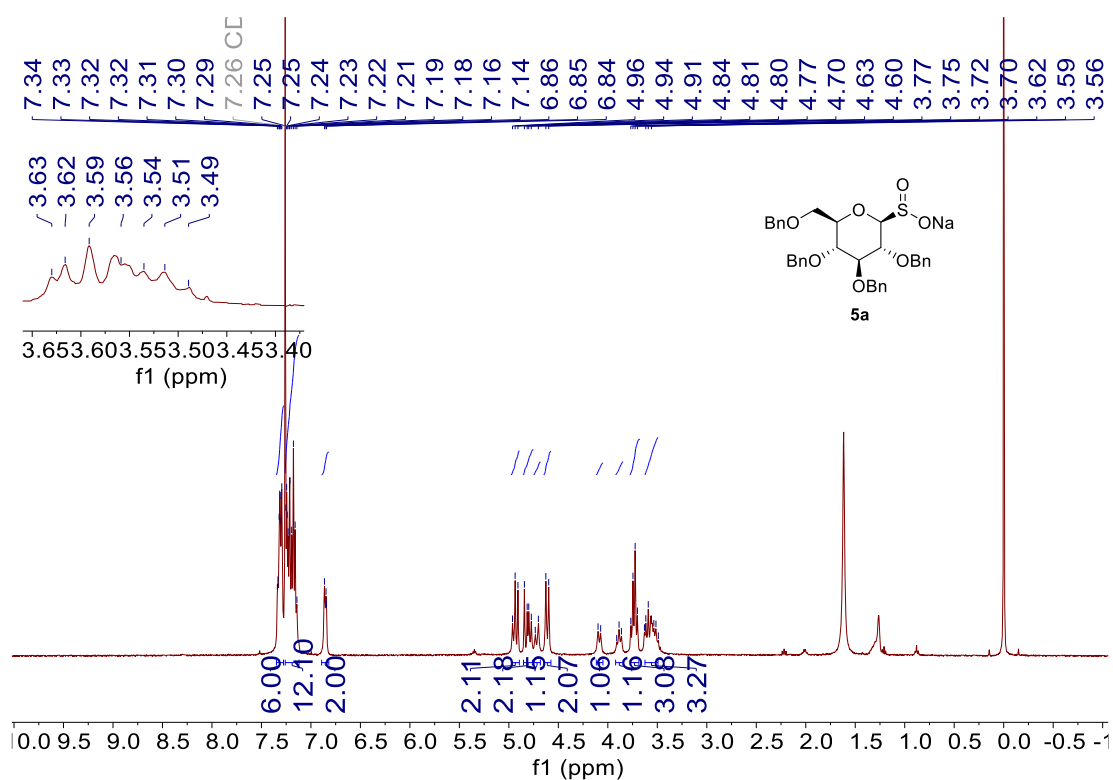

Figure S17. <sup>1</sup>H NMR (400 MHz, CDCl<sub>3</sub>) Spectra for compound 5a

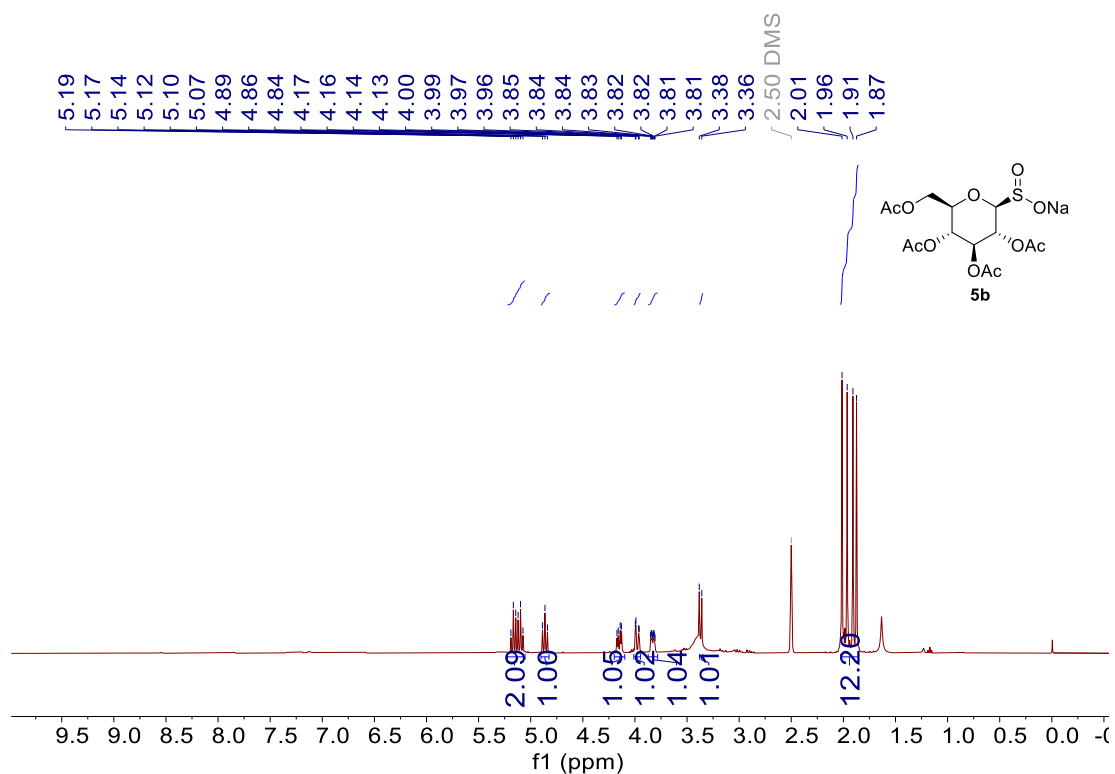

Figure S18.  $^1\text{H}$  NMR (400 MHz,  $\text{DMSO-}d_6$ ) Spectra for compound 5b

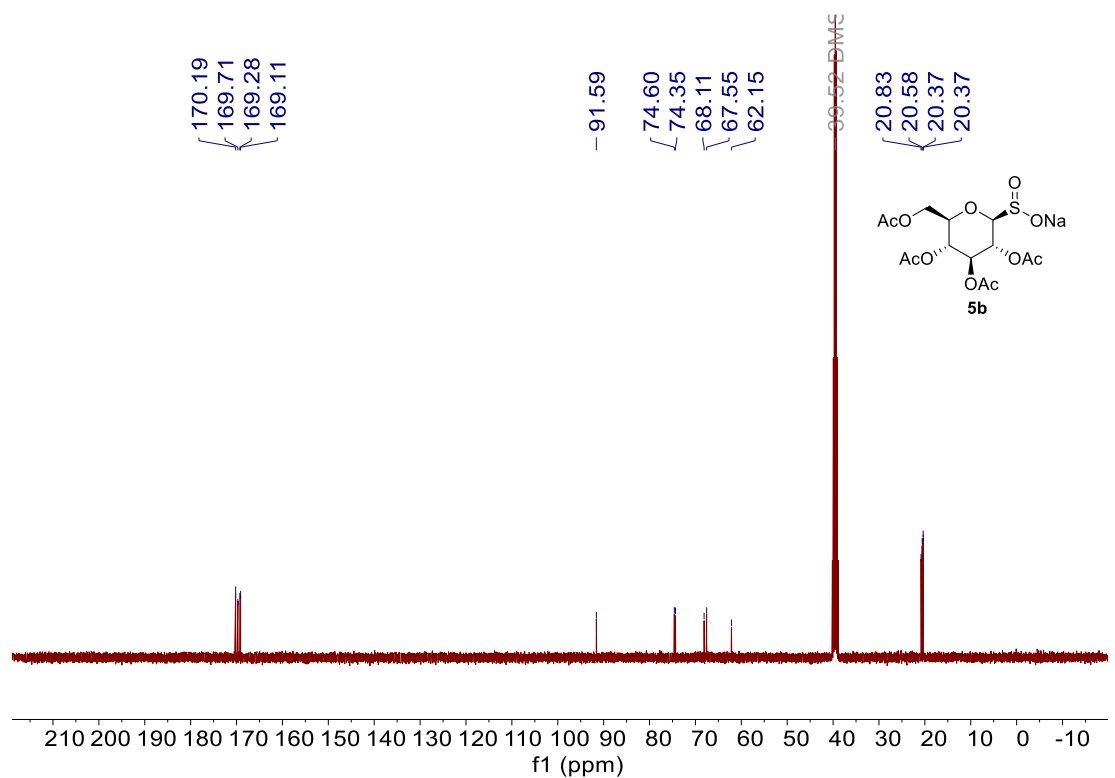

Figure S19.  $^{13}\text{C}$  NMR (101 MHz,  $\text{DMSO-}d_6$ ) Spectra for compound 5b

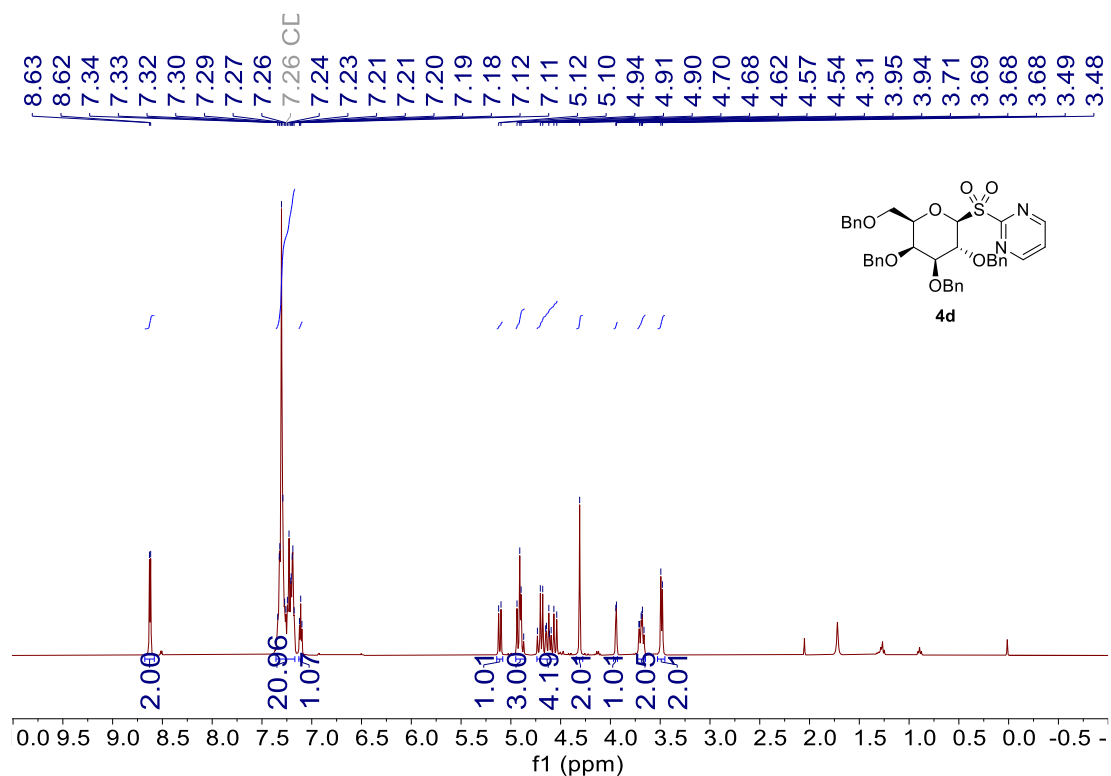

Figure S20.  $^1\text{H}$  NMR (400 MHz,  $\text{CDCl}_3$ ) Spectra for compound 4d

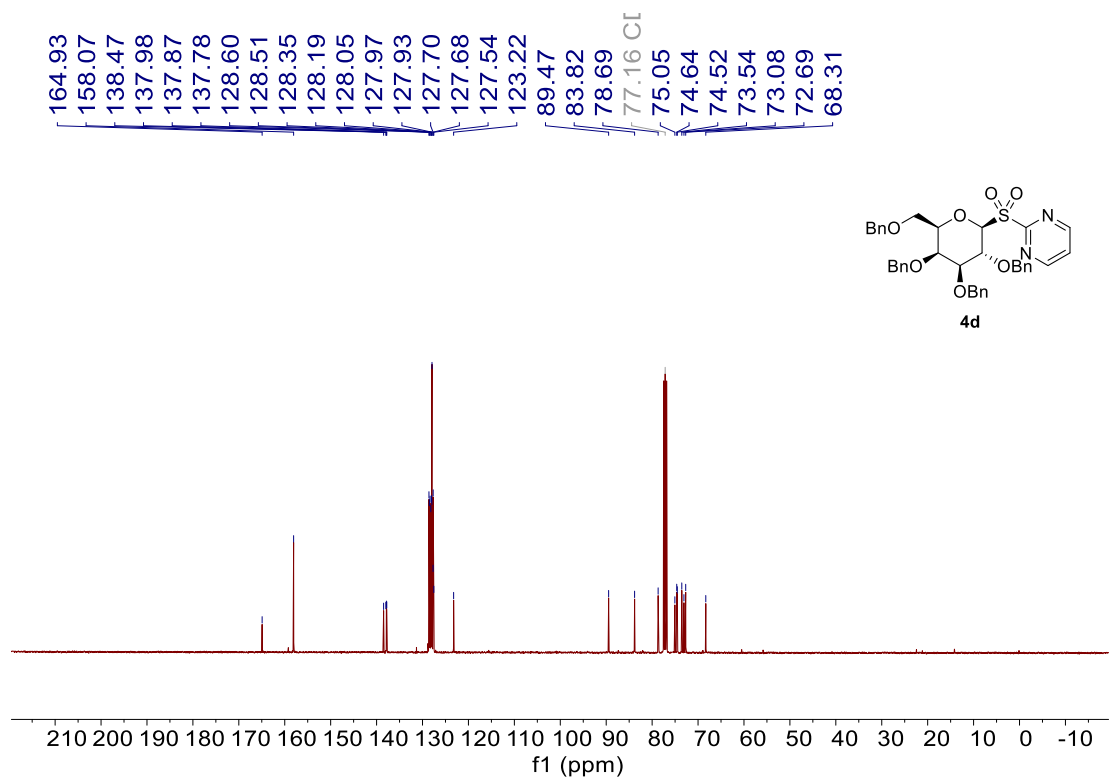

Figure S21.  $^{13}\text{C}$  NMR (101 MHz,  $\text{CDCl}_3$ ) Spectra for compound 4d



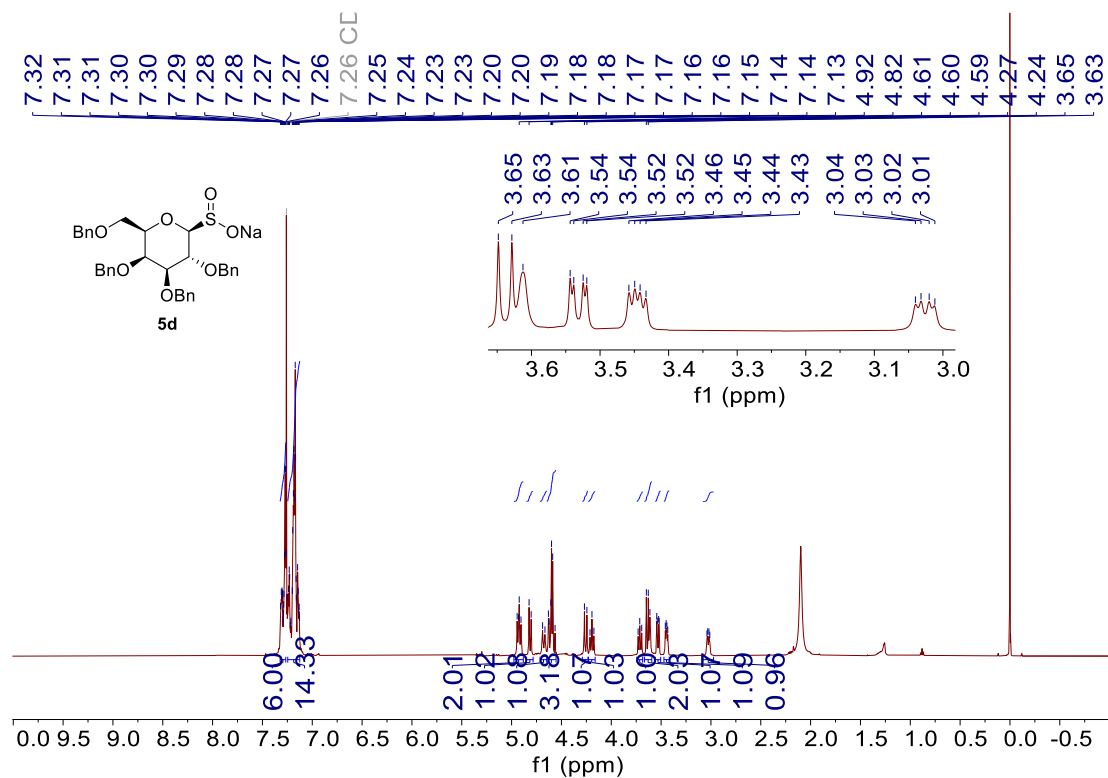

Figure S22. <sup>1</sup>H NMR (500 MHz, CDCl<sub>3</sub>) Spectra for compound 5d

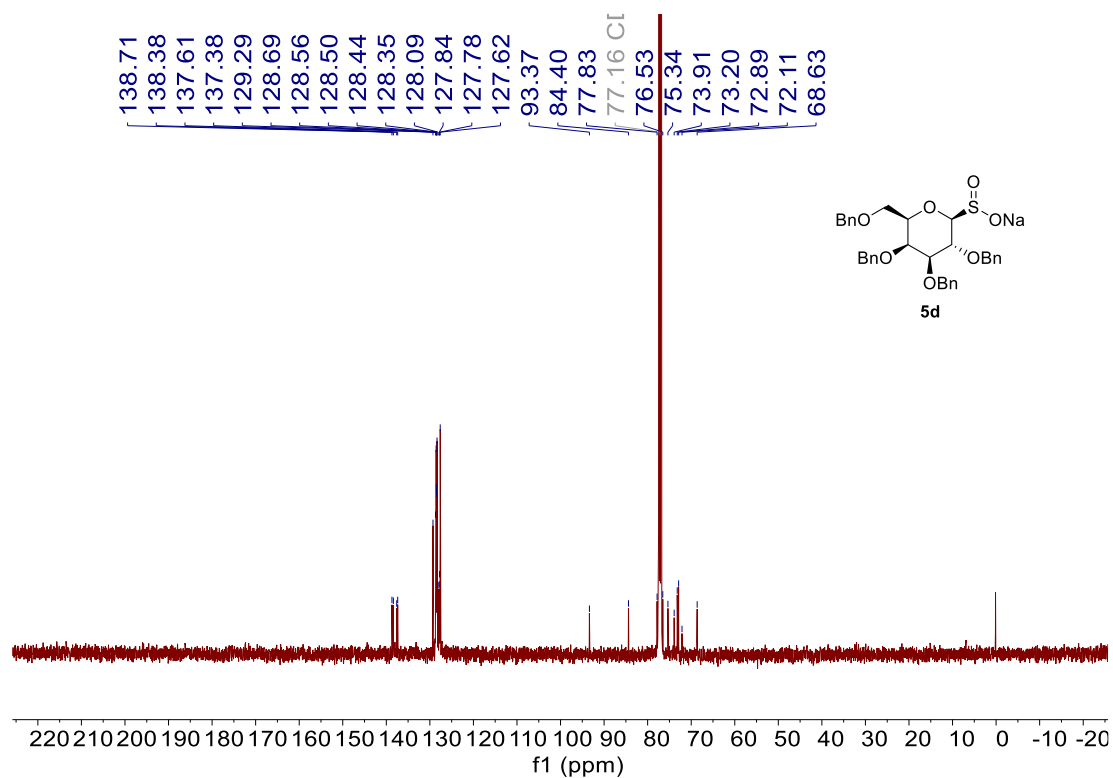

Figure S23. <sup>13</sup>C NMR (126 MHz, CDCl<sub>3</sub>) Spectra for compound 5d

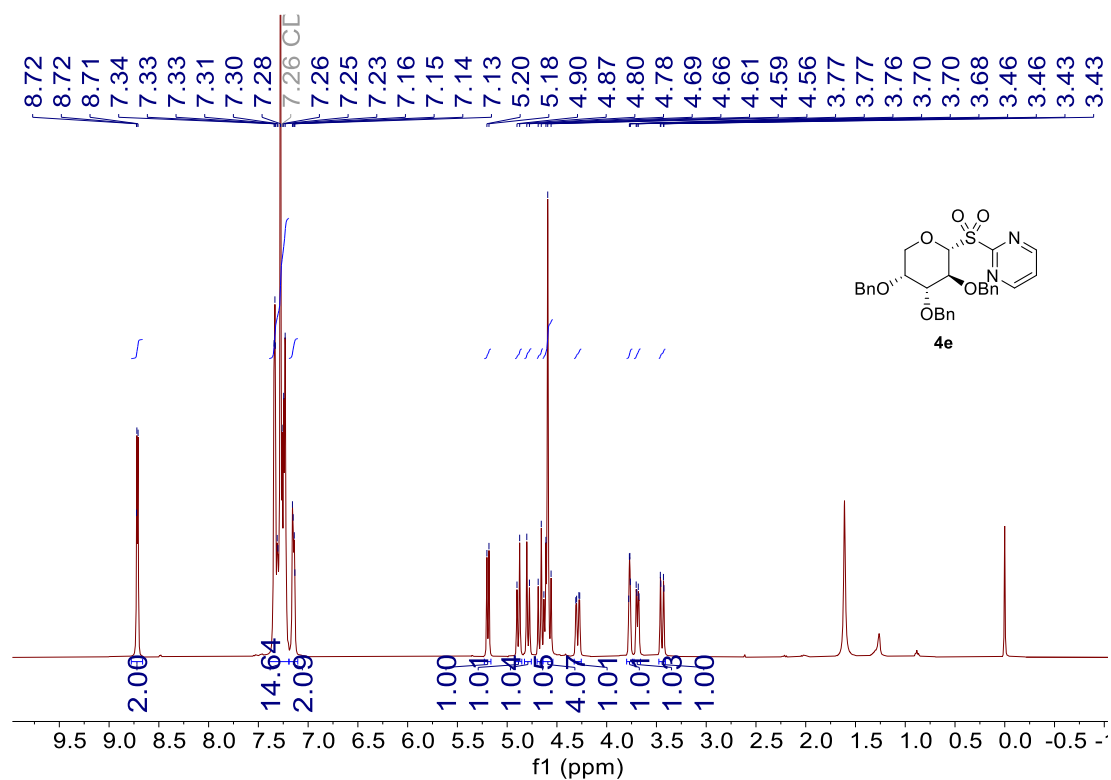

Figure S24. <sup>1</sup>H NMR (400 MHz, CDCl<sub>3</sub>) Spectra for compound 4e

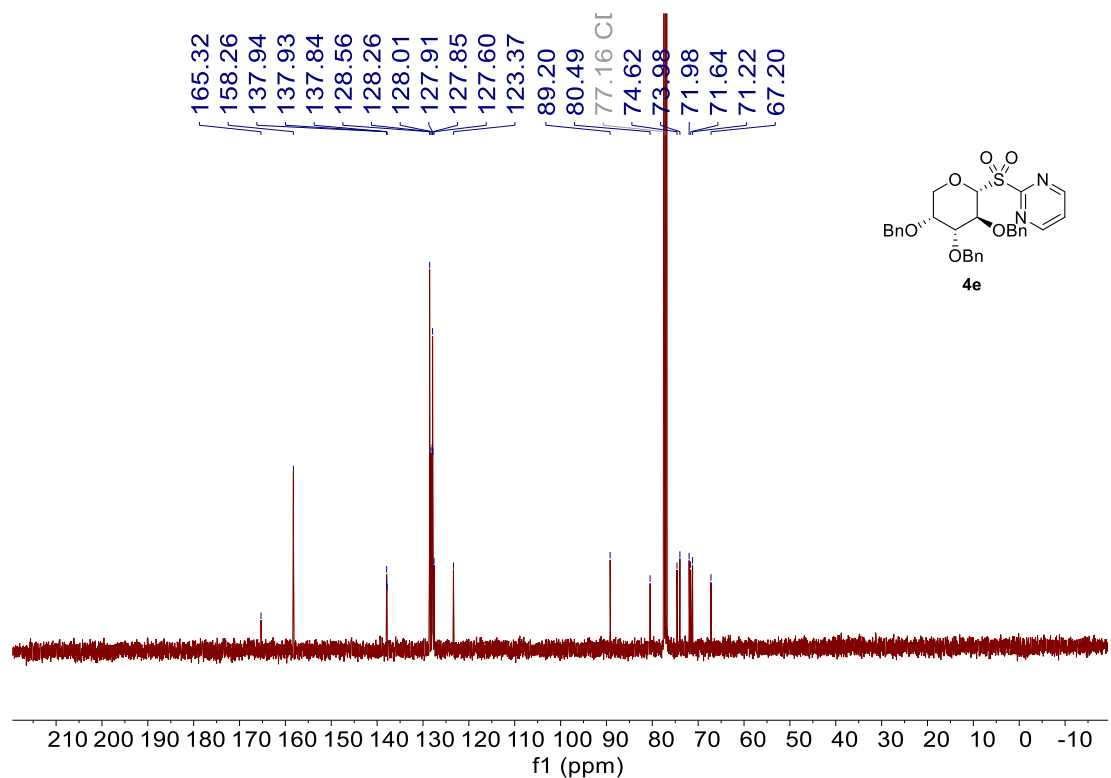

Figure S25. <sup>13</sup>C NMR (101 MHz, CDCl<sub>3</sub>) Spectra for compound 4e

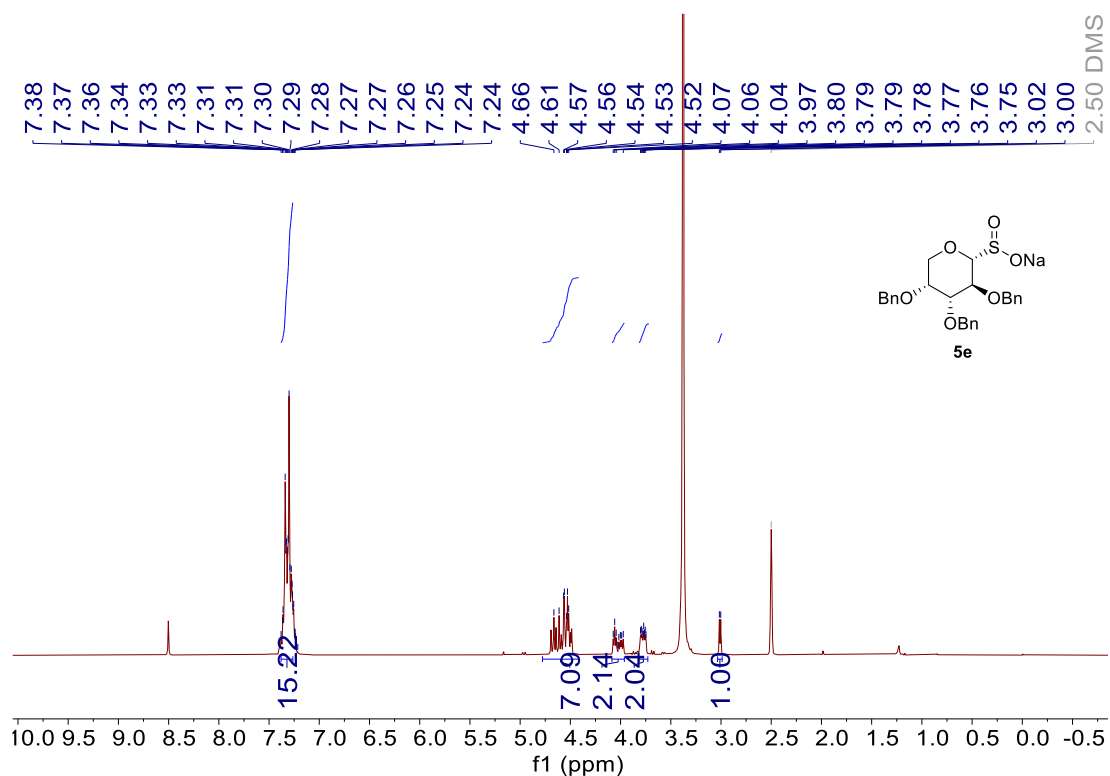

Figure S26.  $^1\text{H}$  NMR (400 MHz,  $\text{DMSO-}d_6$ ) Spectra for compound 5e

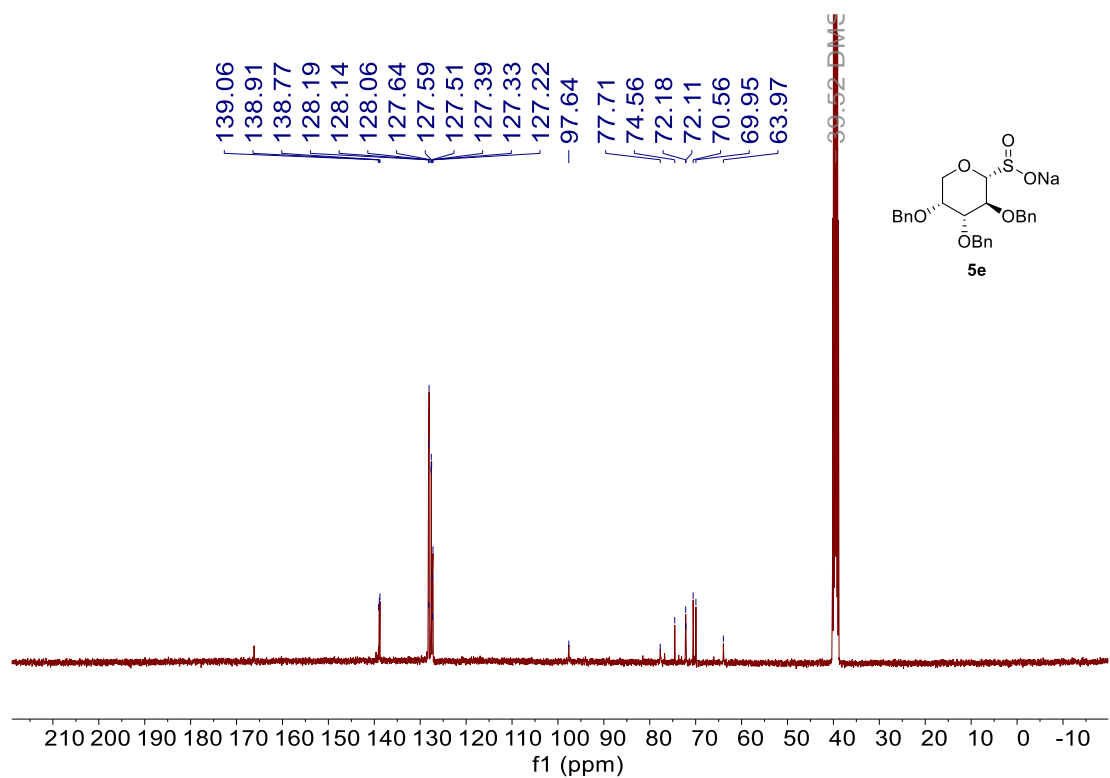

Figure S27.  $^{13}\text{C}$  NMR (126 MHz,  $\text{DMSO-}d_6$ ) Spectra for compound 5e

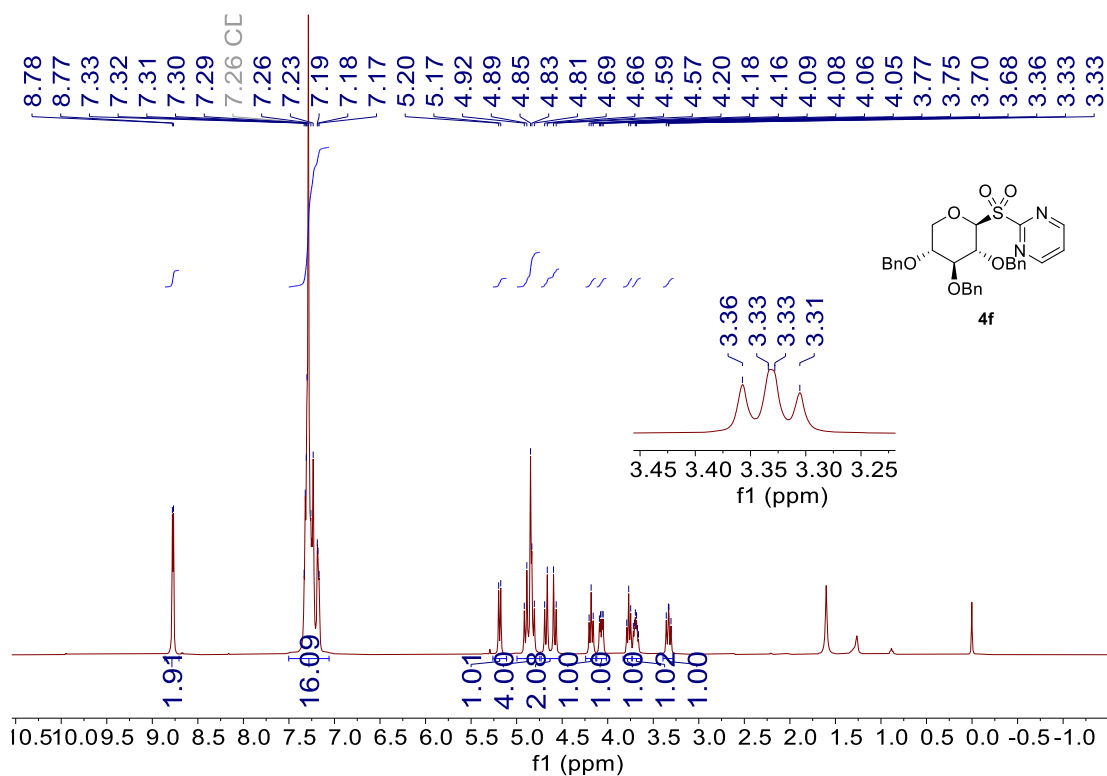

Figure S28. <sup>1</sup>H NMR (400 MHz, CDCl<sub>3</sub>) Spectra for compound 4f

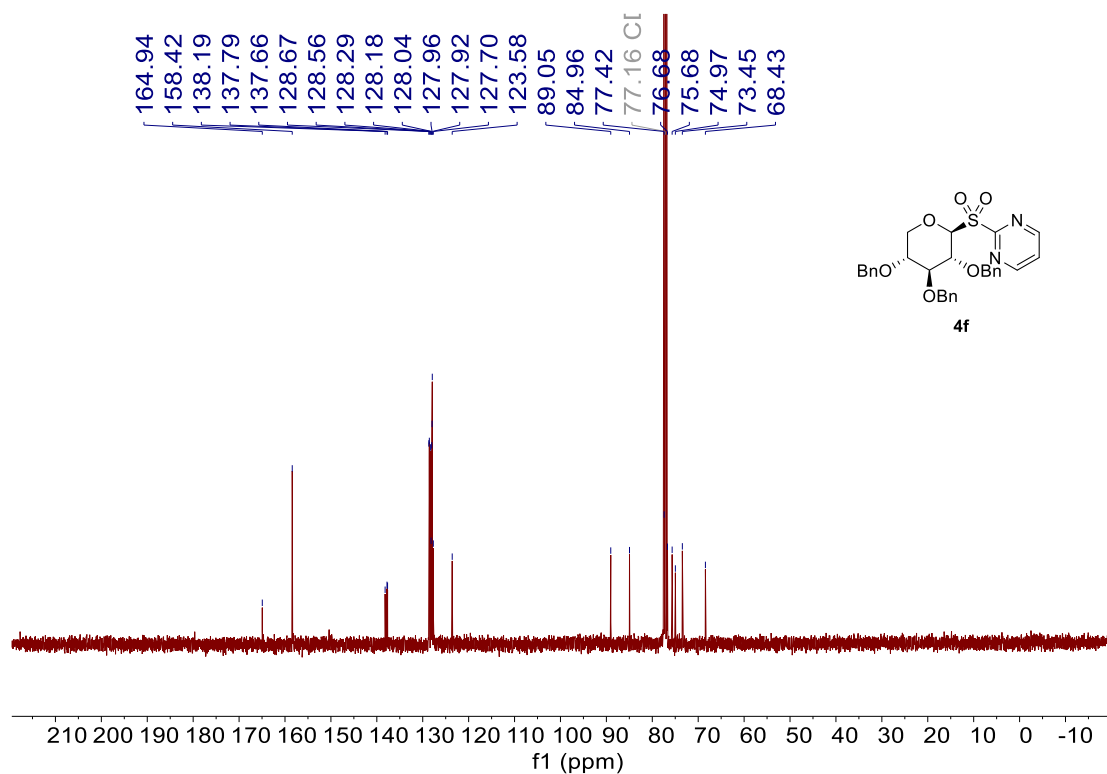

Figure S29. <sup>13</sup>C NMR (101 MHz, CDCl<sub>3</sub>) Spectra for compound 4f

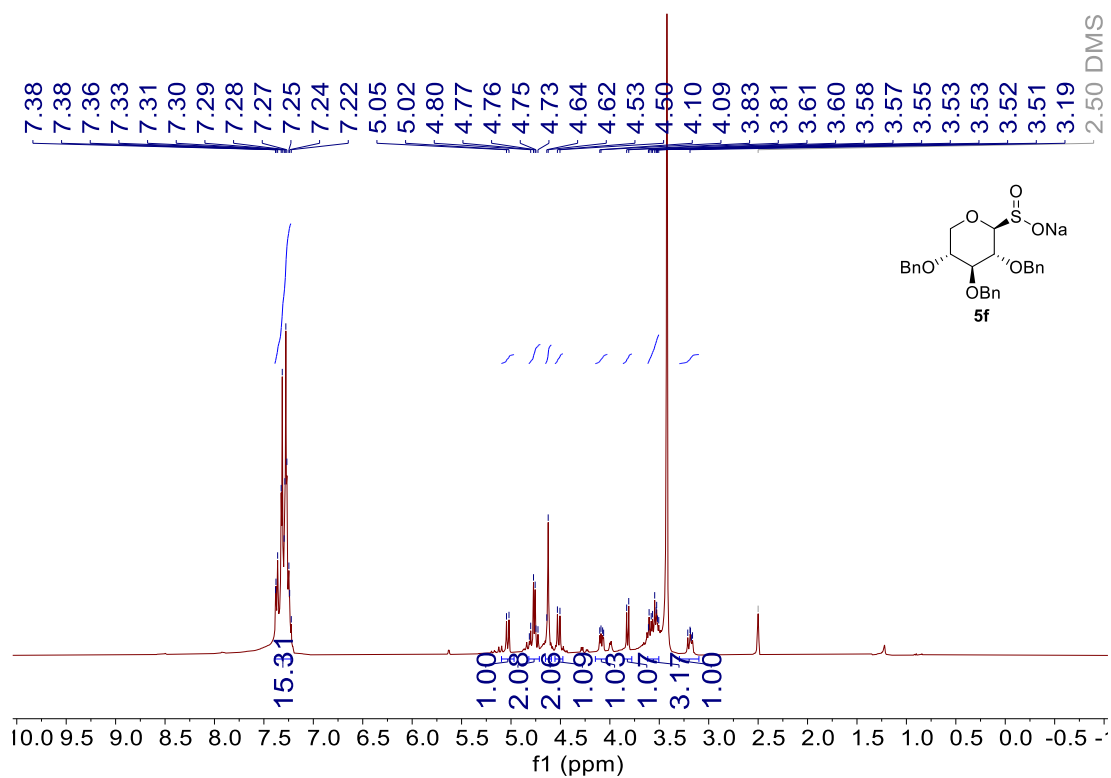

Figure S30.  $^1\text{H}$  NMR (400 MHz,  $\text{CDCl}_3$ ) Spectra for compound 5f

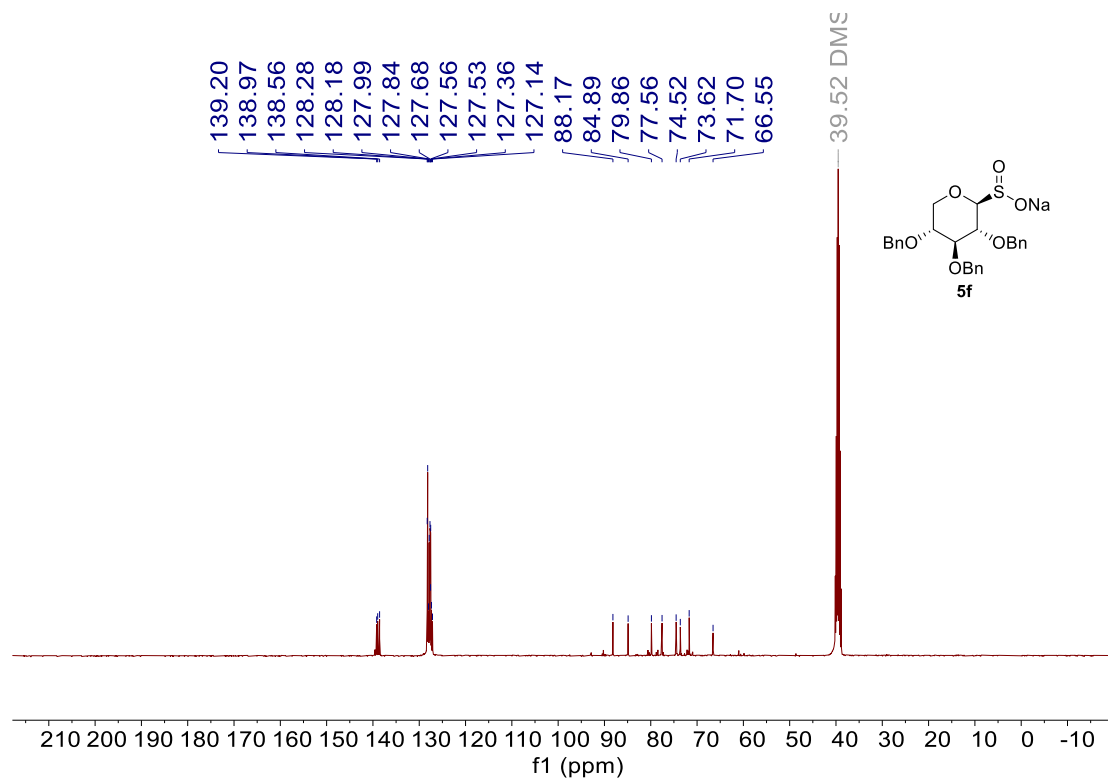

Figure S31.  $^{13}\text{C}$  NMR (101 MHz,  $\text{CDCl}_3$ ) Spectra for compound 5f

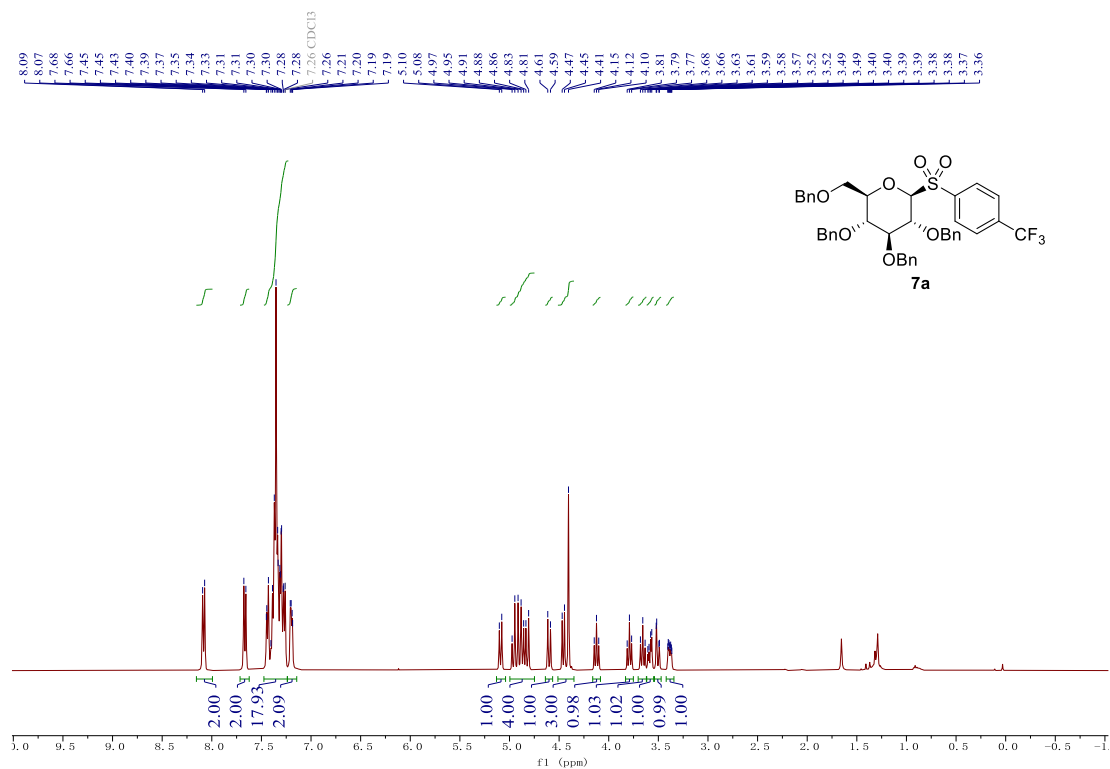

Figure S32. <sup>1</sup>H NMR (400 MHz, CDCl<sub>3</sub>) Spectra for compound 7a

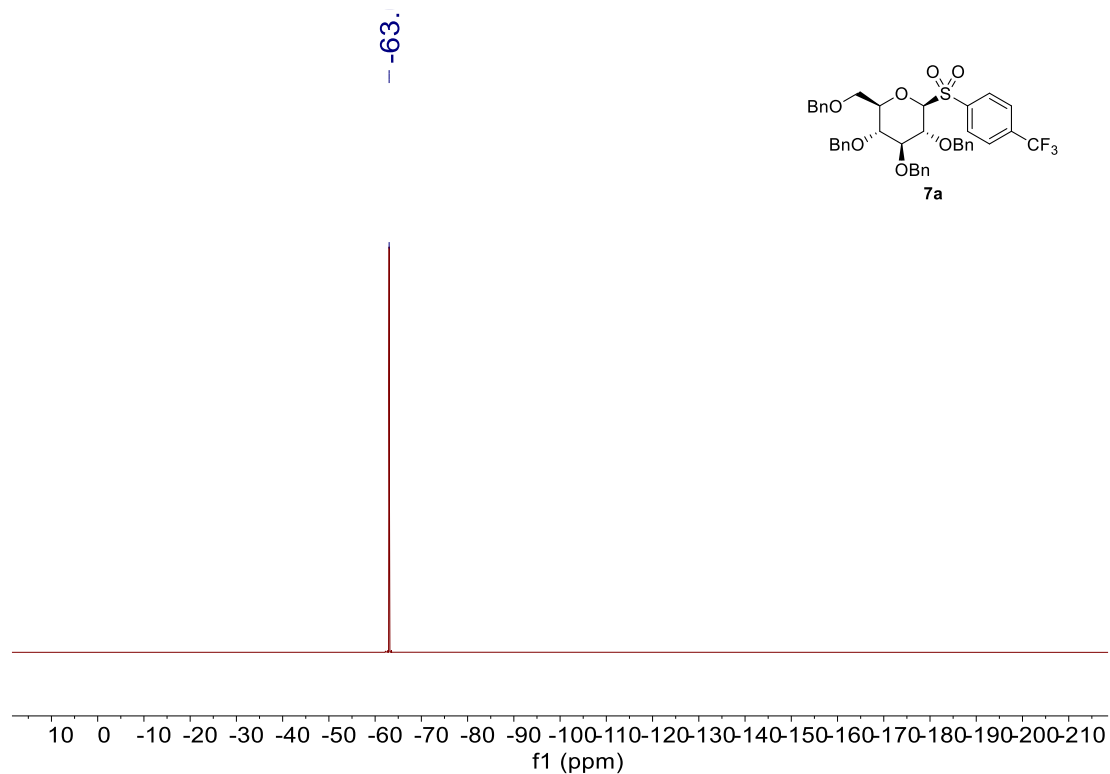

Figure S33. <sup>19</sup>F NMR (376 MHz, CDCl<sub>3</sub>) Spectra for compound 7a

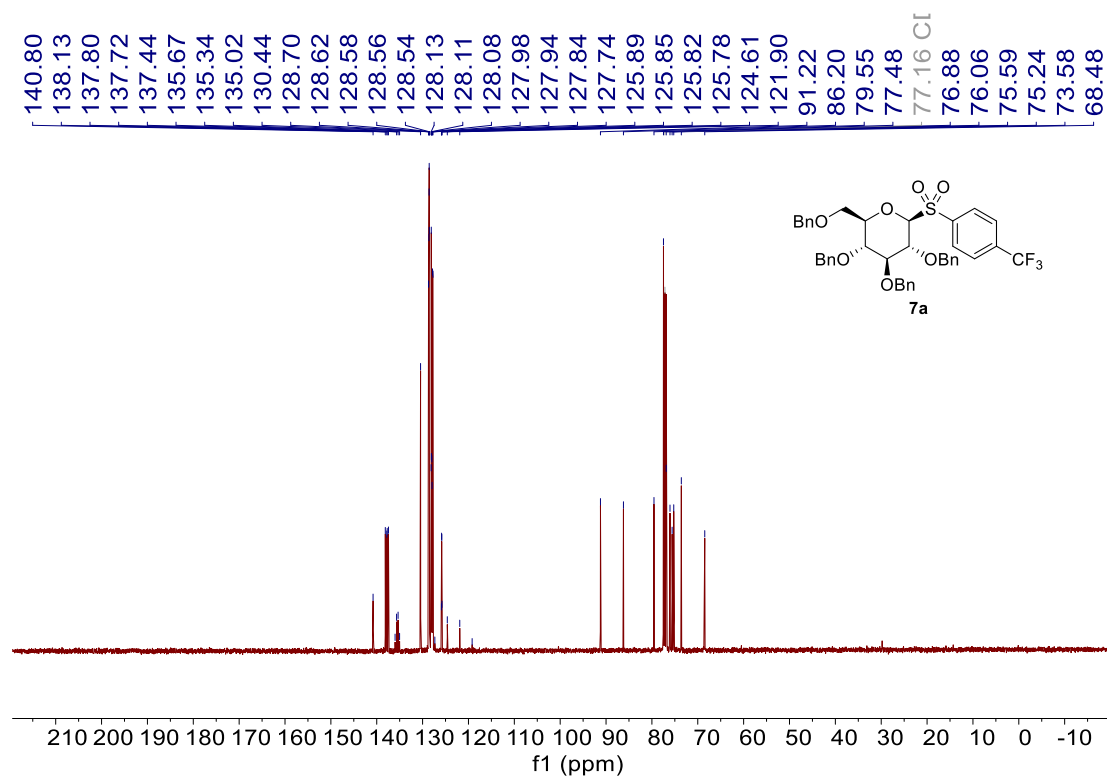

Figure S34.  $^{13}\text{C}$  NMR (101 MHz,  $\text{CDCl}_3$ ) Spectra for compound 7a

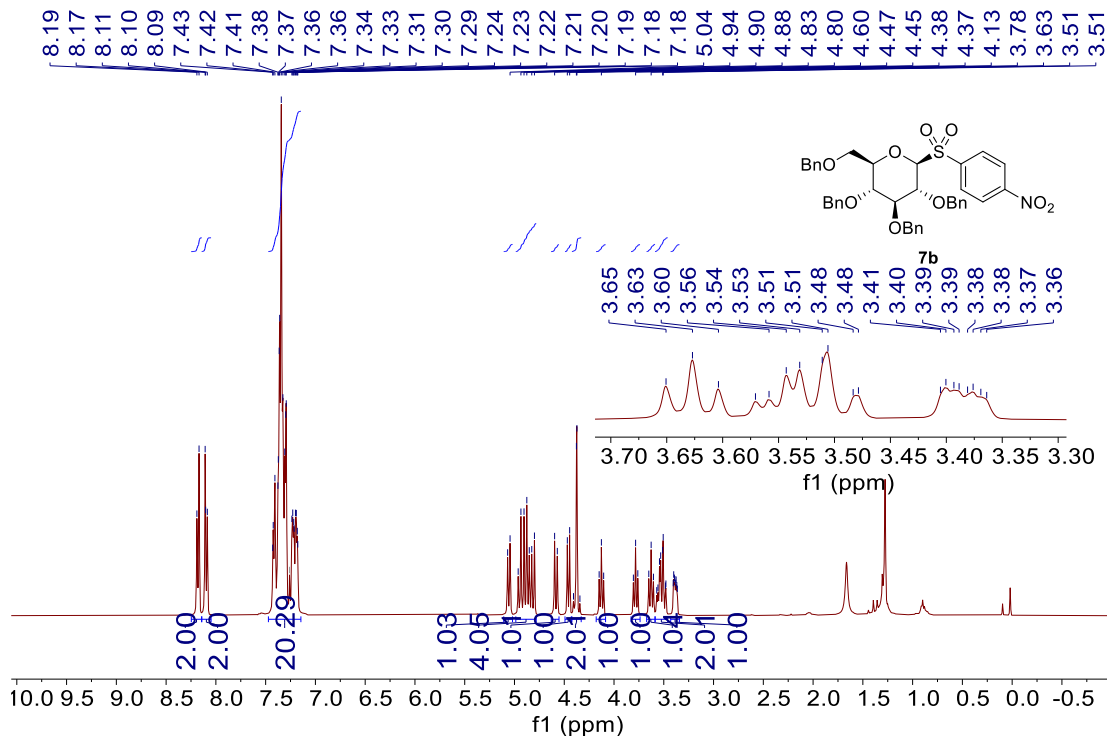

Figure S35.  $^1\text{H}$  NMR (400 MHz,  $\text{CDCl}_3$ ) Spectra for compound 7b

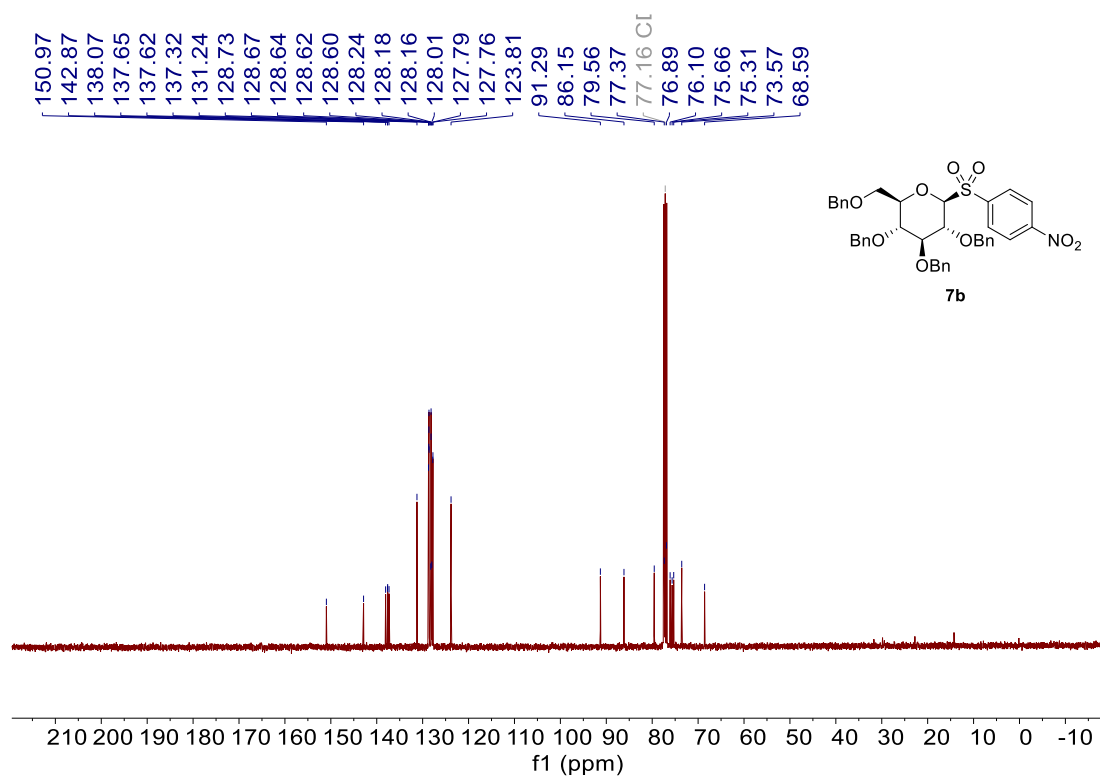

**Figure S36.**  $^{13}\text{C}$  NMR (101 MHz,  $\text{CDCl}_3$ ) Spectra for compound **7b**

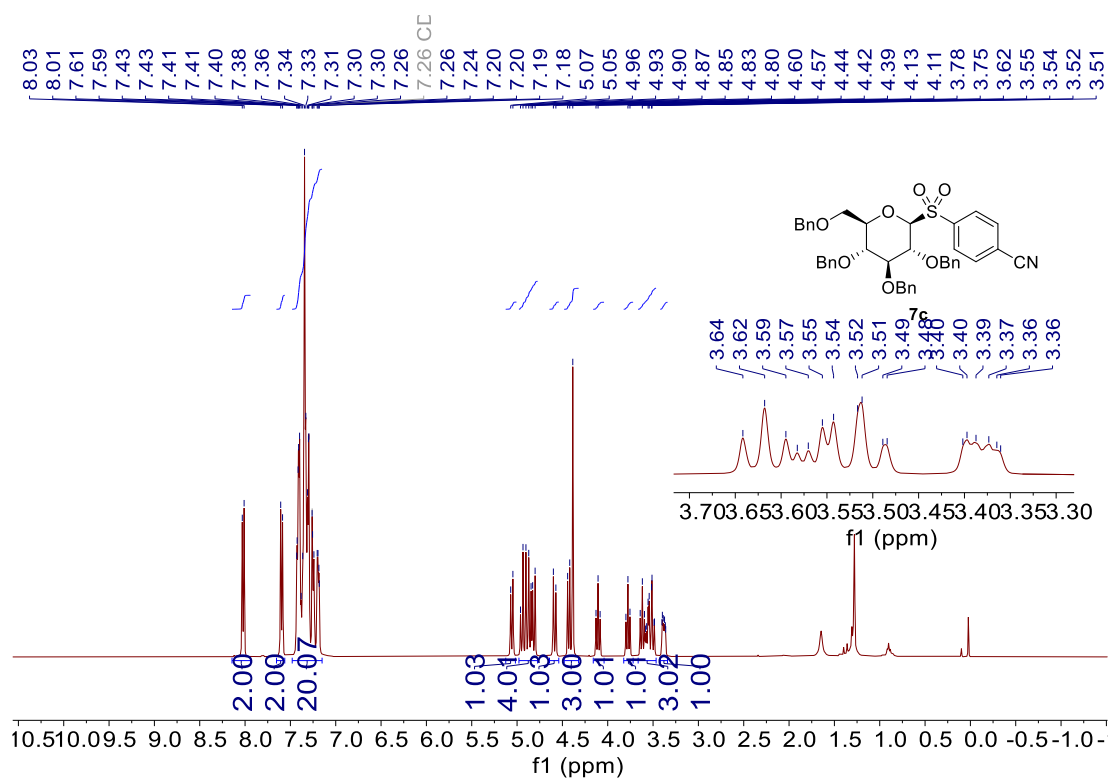

**Figure S37.**  $^1\text{H}$  NMR (400 MHz,  $\text{CDCl}_3$ ) Spectra for compound **7c**



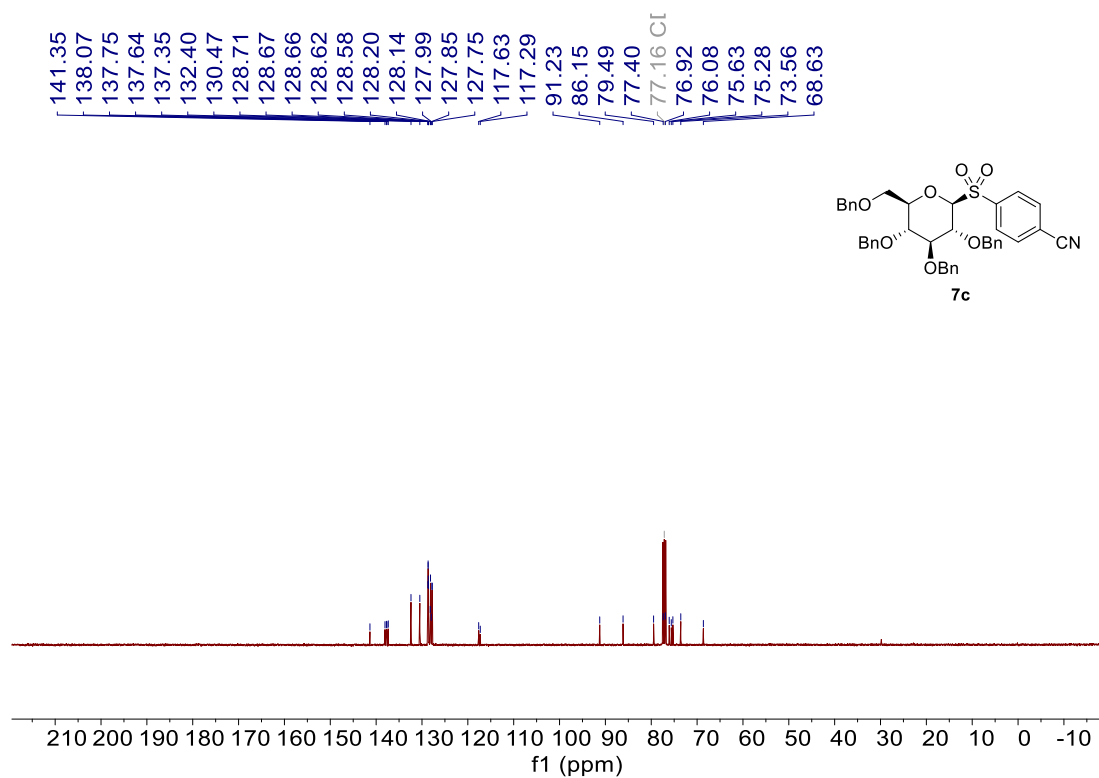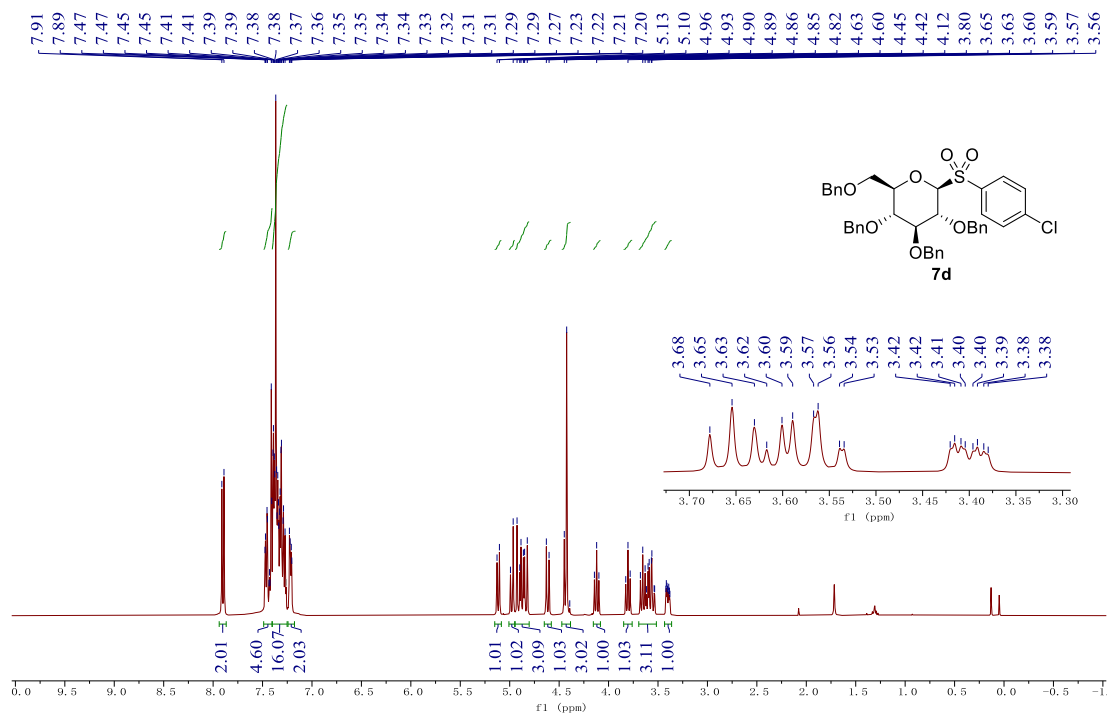

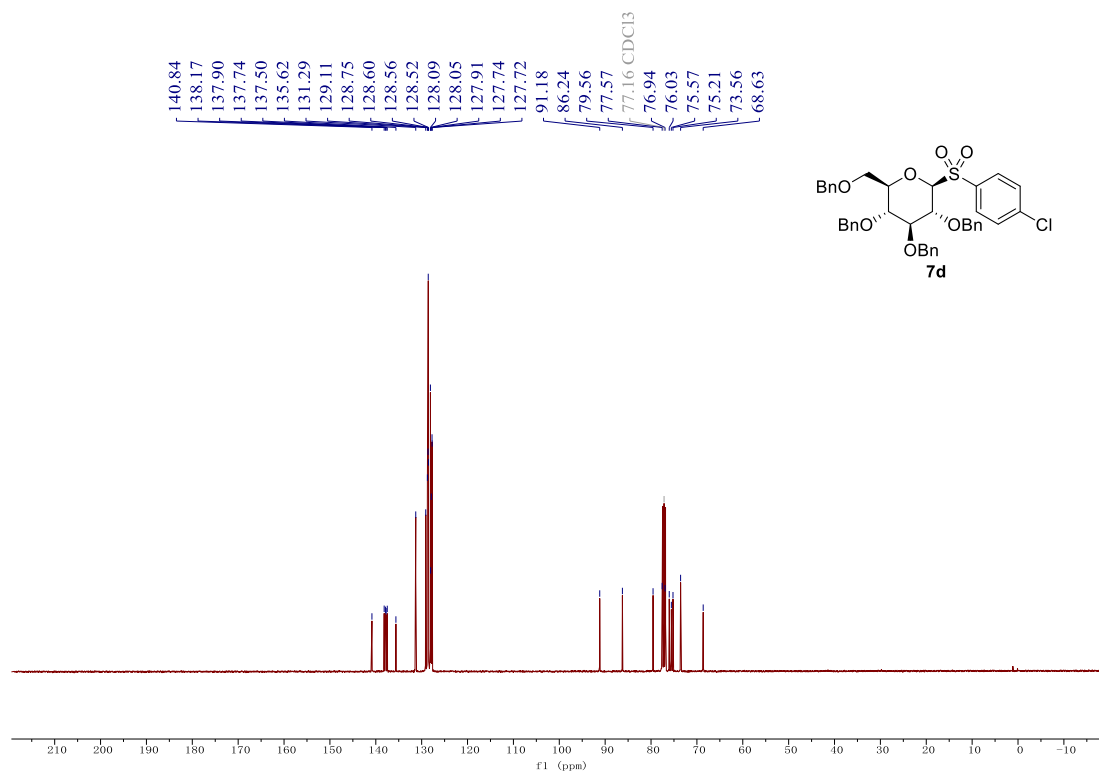

**Figure S40.** <sup>13</sup>C NMR (101 MHz, CDCl<sub>3</sub>) Spectra for compound **7d**

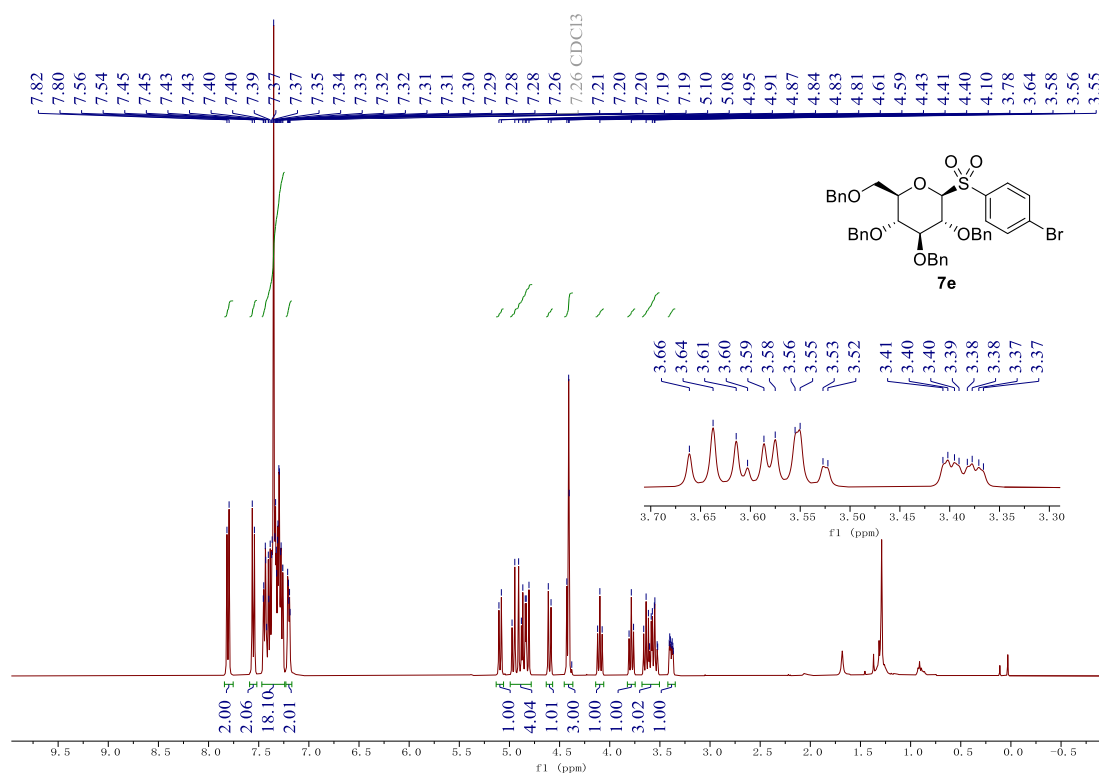

**Figure S41.** <sup>1</sup>H NMR (400 MHz, CDCl<sub>3</sub>) Spectra for compound **7e**

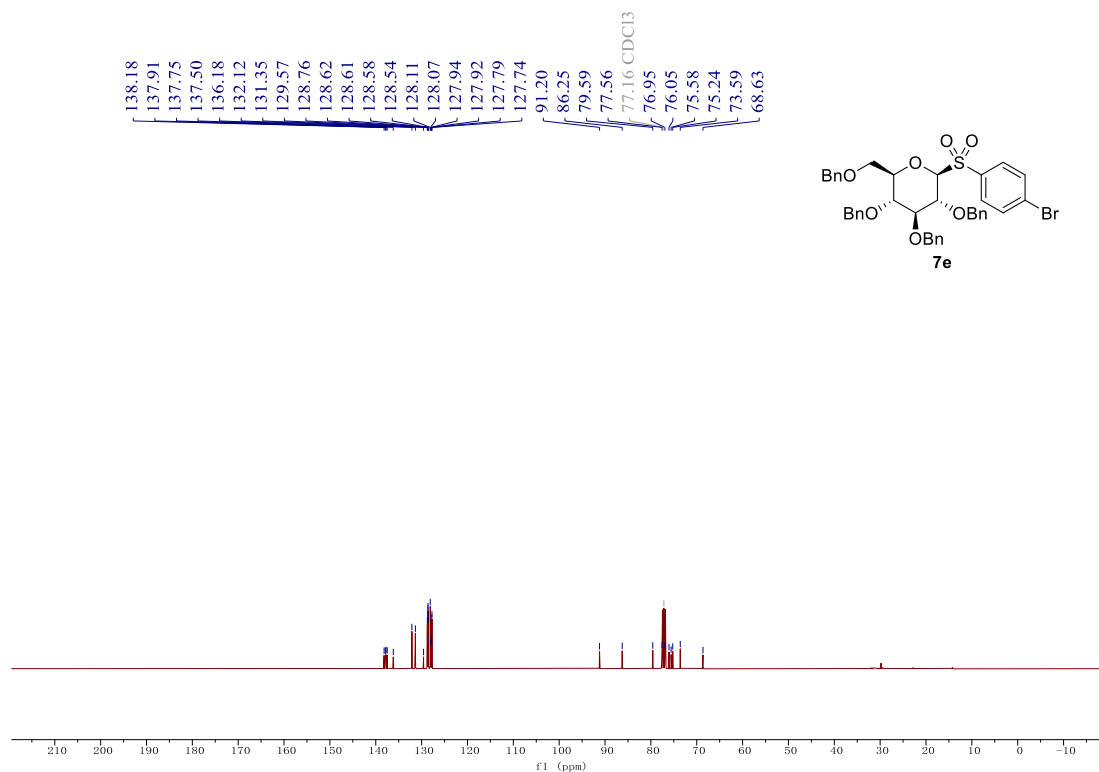

Figure S42. <sup>13</sup>C NMR (101 MHz, CDCl<sub>3</sub>) Spectra for compound **7e**

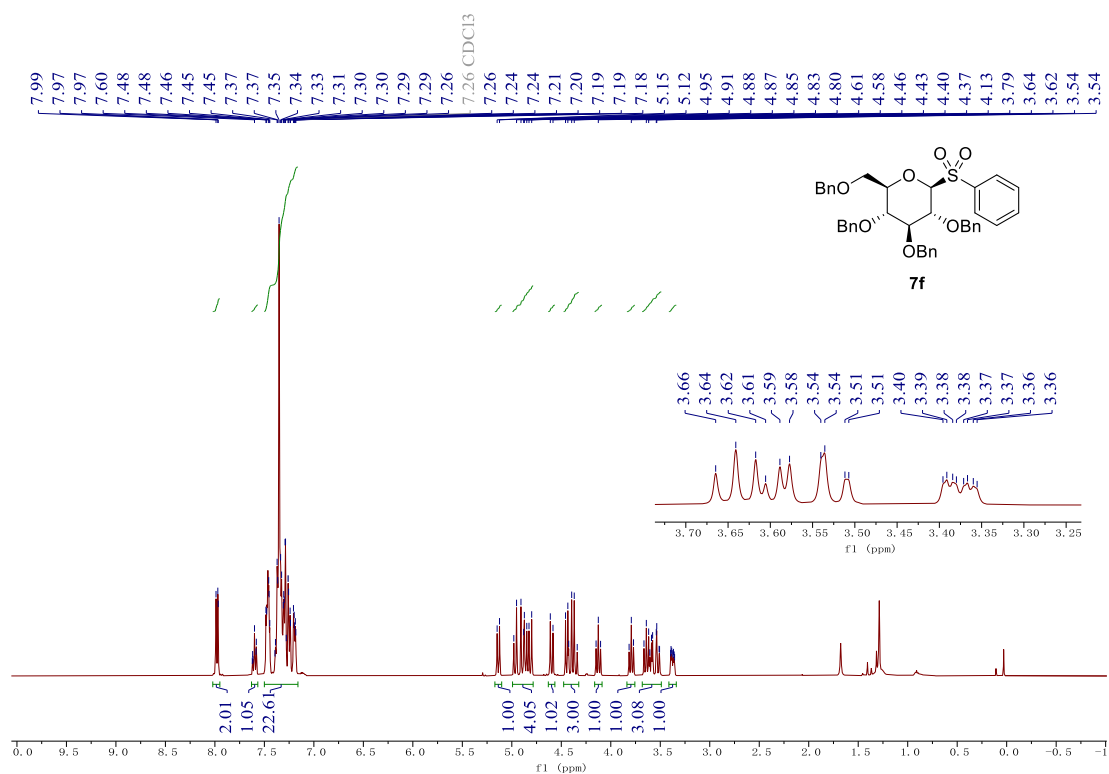

Figure S43. <sup>1</sup>H NMR (400 MHz, CDCl<sub>3</sub>) Spectra for compound **7f**

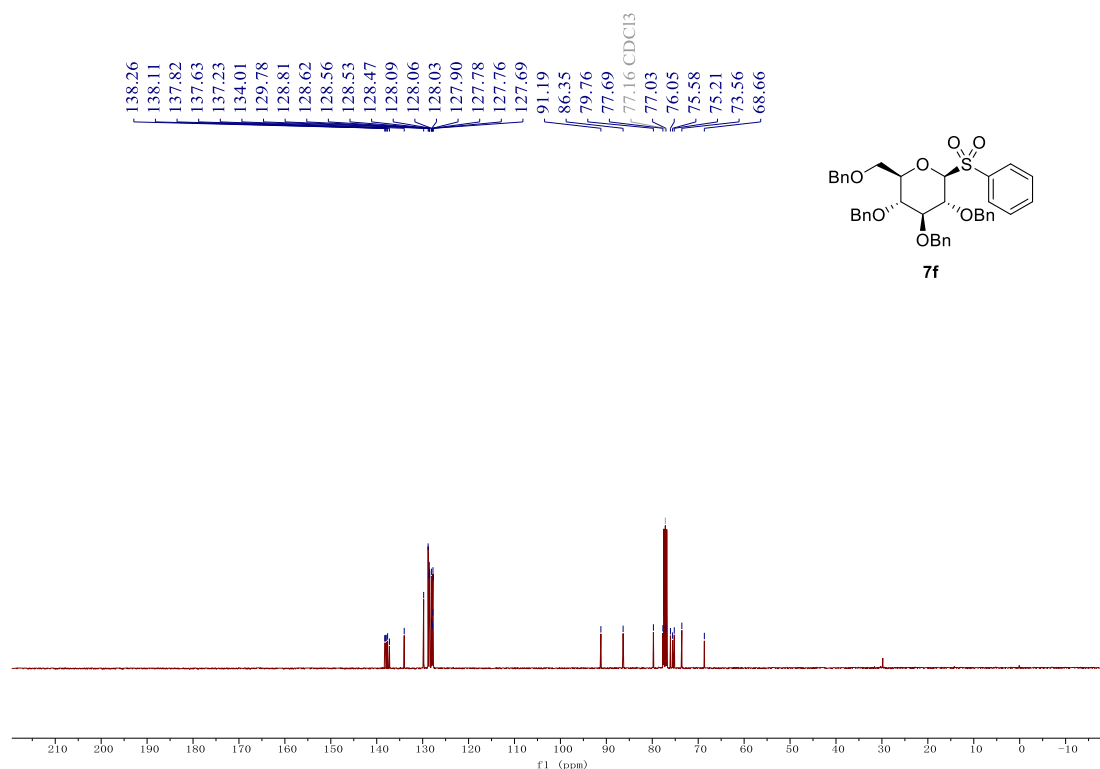

Figure S44. <sup>13</sup>C NMR (101 MHz, CDCl<sub>3</sub>) Spectra for compound 7f

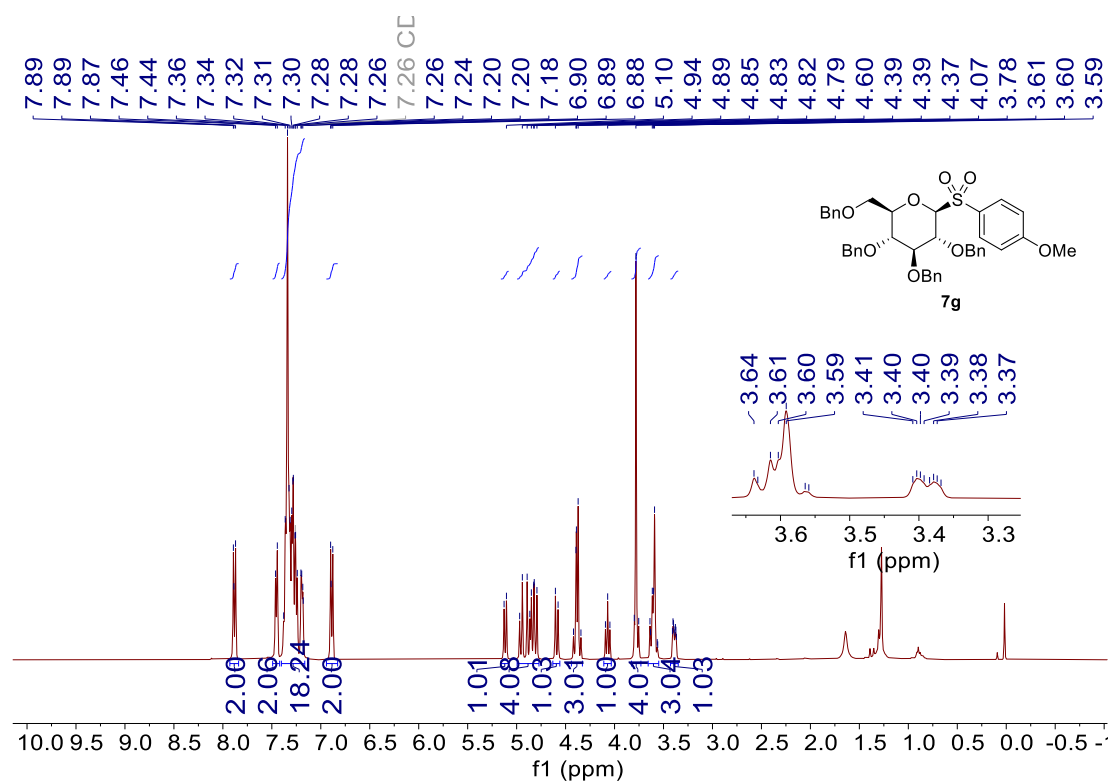

Figure S45. <sup>1</sup>H NMR (400 MHz, CDCl<sub>3</sub>) Spectra for compound 7g

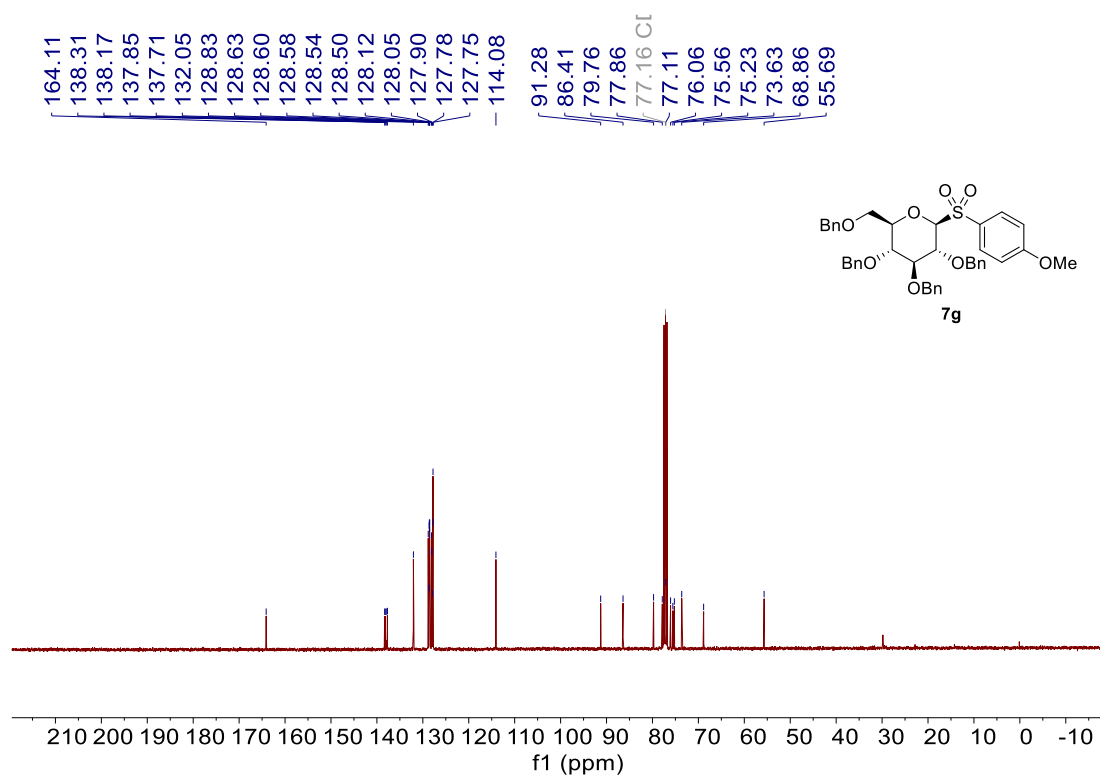

Figure S46.  $^{13}\text{C}$  NMR (101 MHz,  $\text{CDCl}_3$ ) Spectra for compound 7g

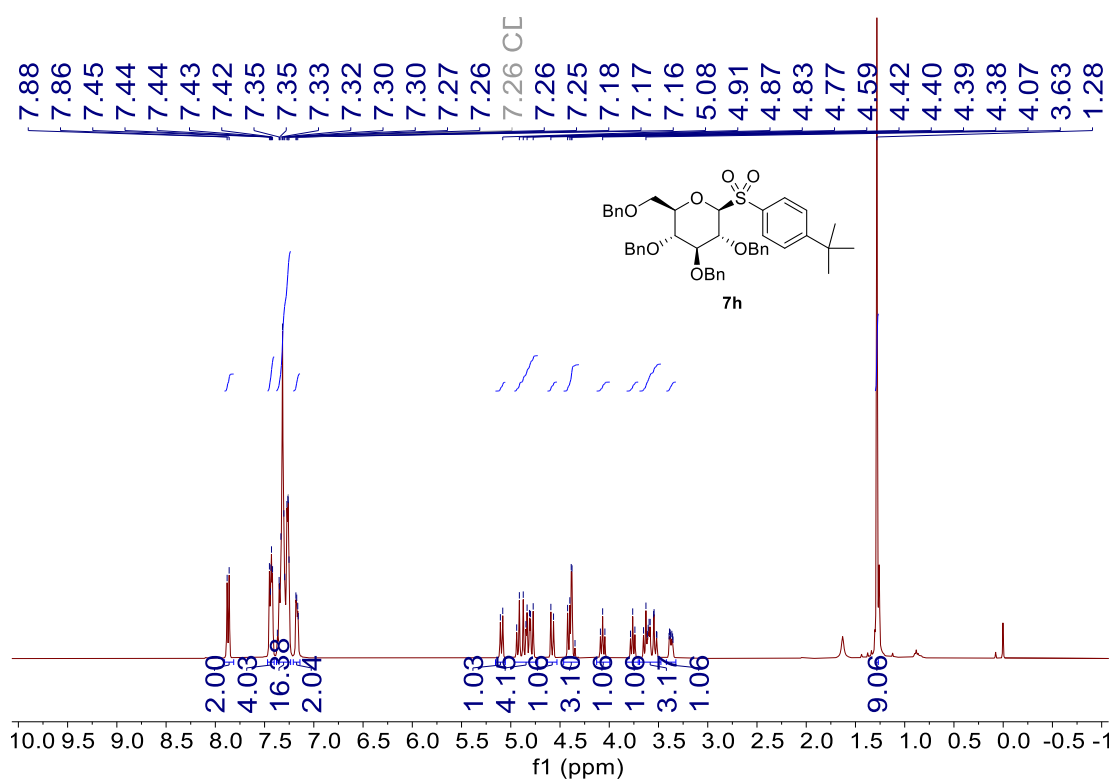

Figure S47.  $^1\text{H}$  NMR (400 MHz,  $\text{CDCl}_3$ ) Spectra for compound 7h

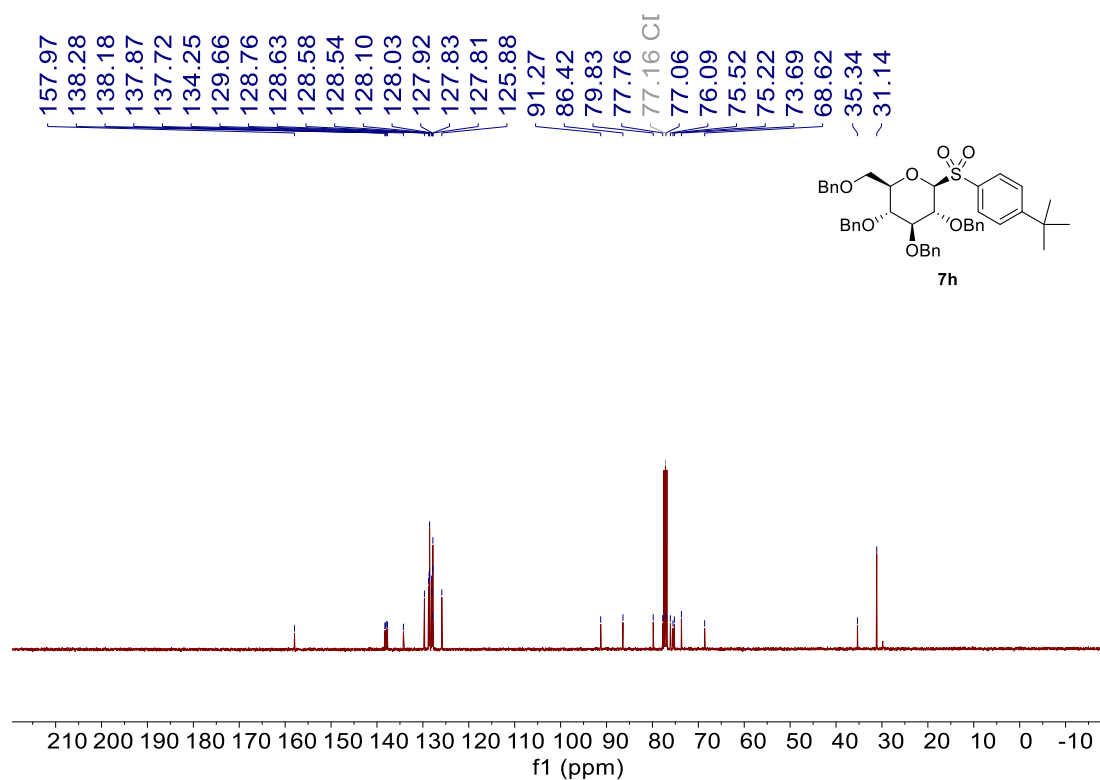

**Figure S48.**  $^{13}\text{C}$  NMR (101 MHz,  $\text{CDCl}_3$ ) Spectra for compound **7h**

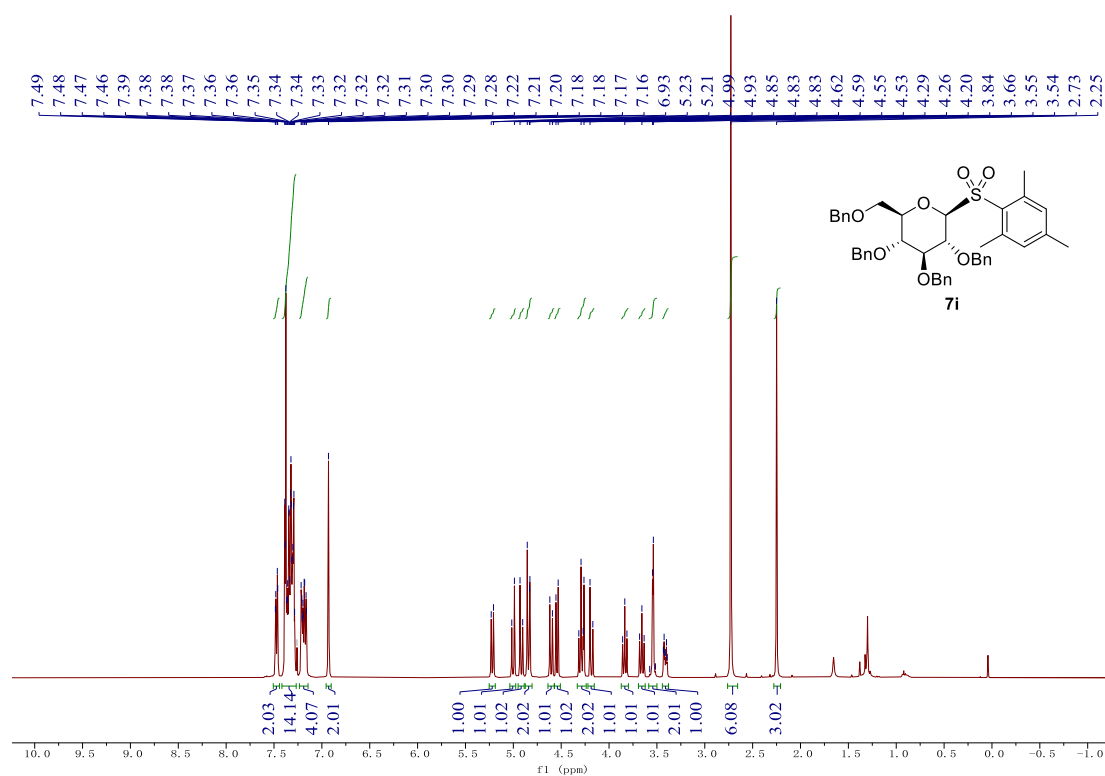

**Figure S49.**  $^1\text{H}$  NMR (400 MHz,  $\text{CDCl}_3$ ) Spectra for compound **7i**

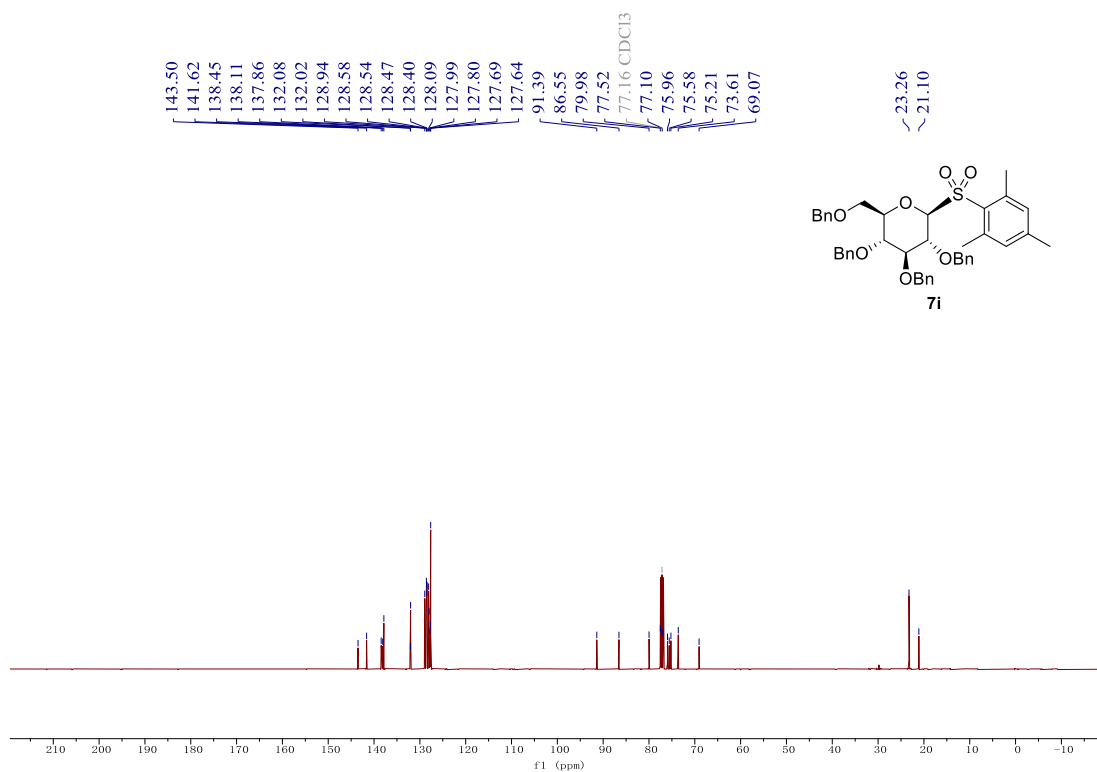

Figure S50.  $^{13}\text{C}$  NMR (101 MHz,  $\text{CDCl}_3$ ) Spectra for compound 7i

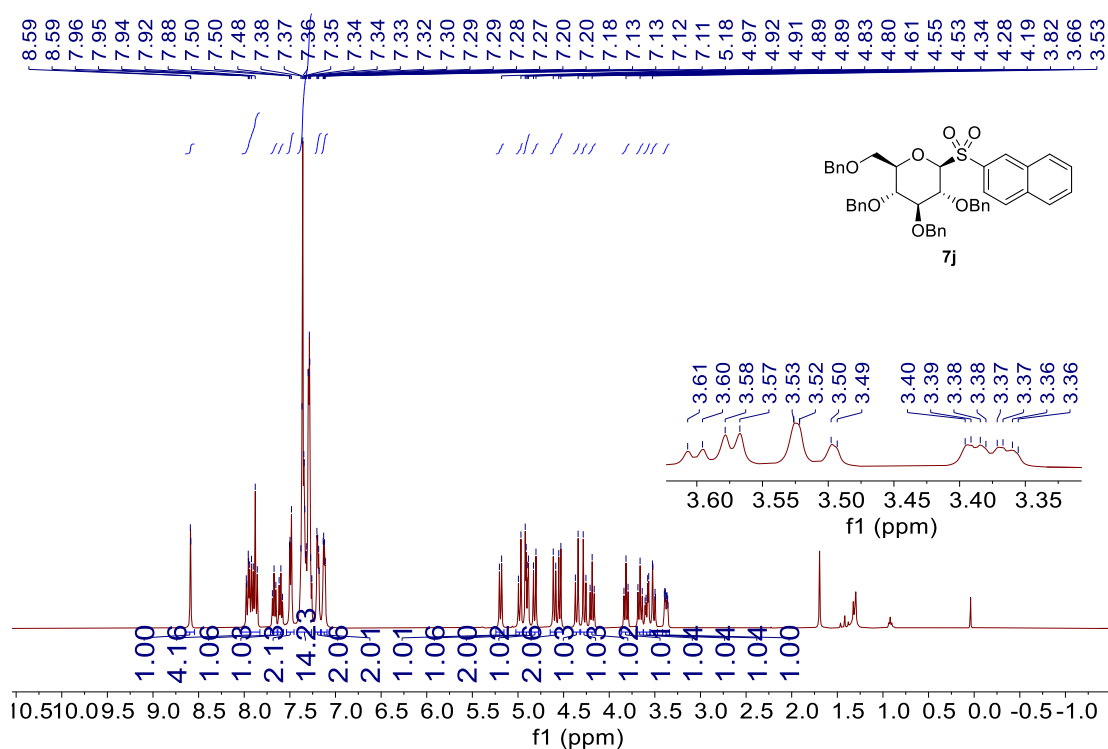

Figure S51.  $^1\text{H}$  NMR (400 MHz,  $\text{CDCl}_3$ ) Spectra for compound 7j

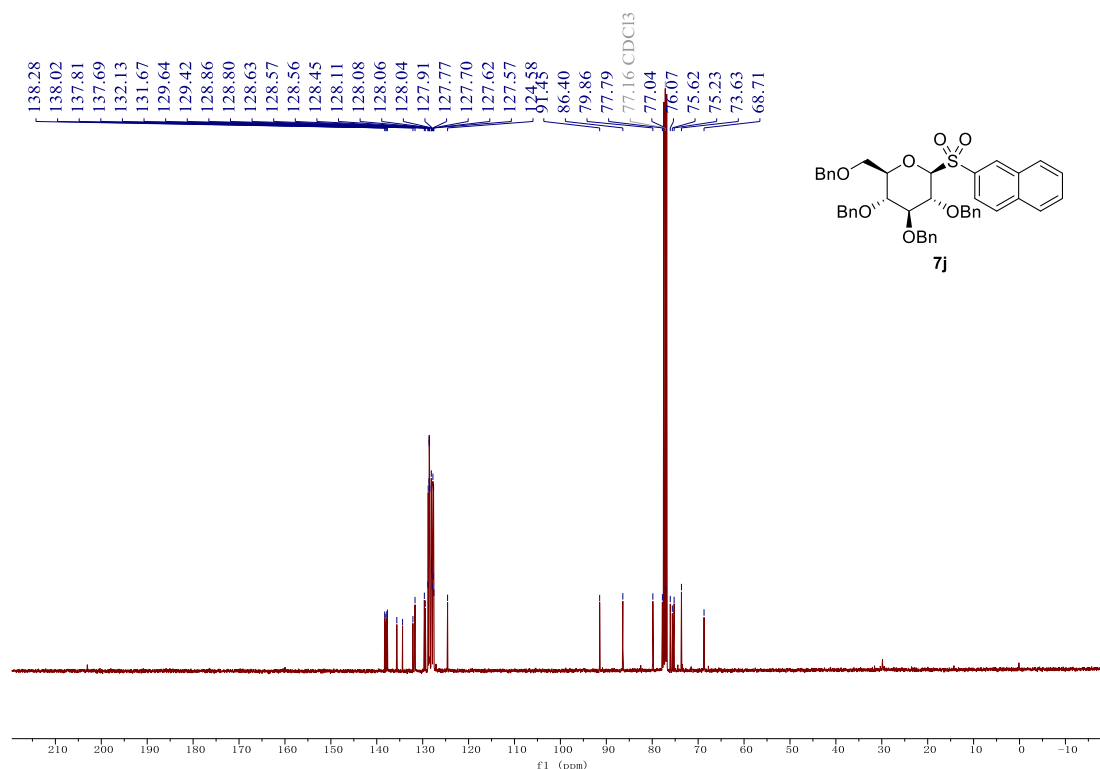

Figure S52. <sup>13</sup>C NMR (101 MHz, CDCl<sub>3</sub>) Spectra for compound 7j

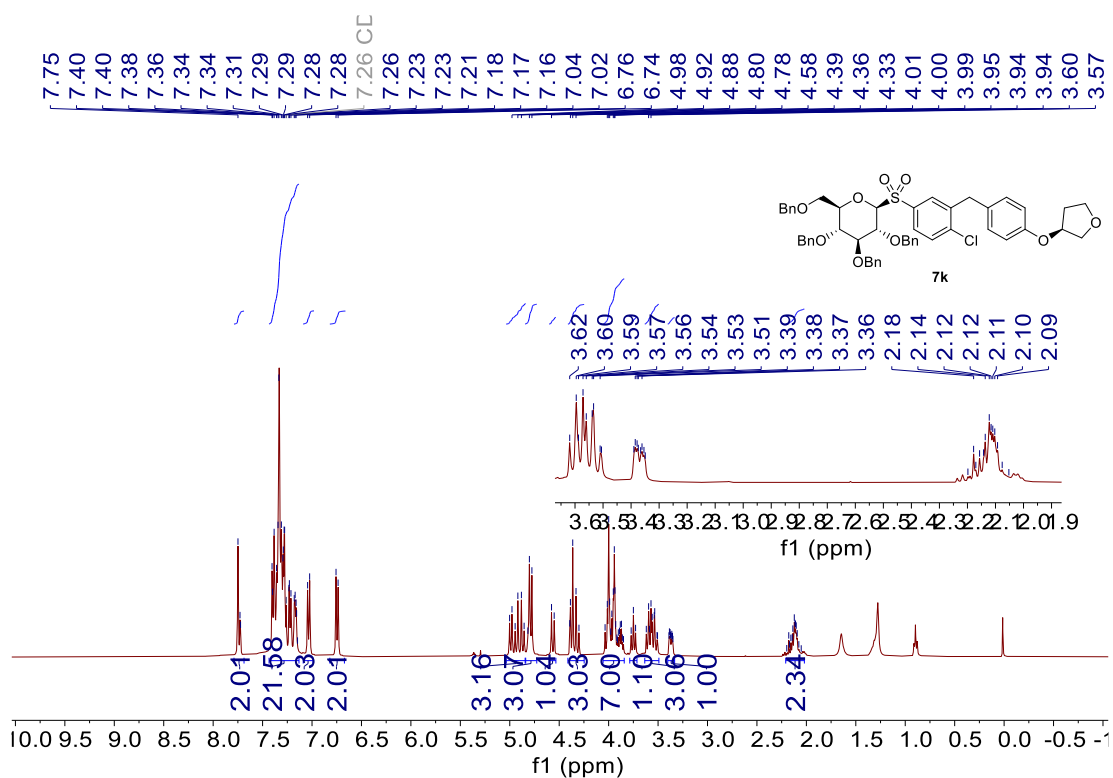

Figure S53. <sup>1</sup>H NMR (400 MHz, CDCl<sub>3</sub>) Spectra for compound 7k



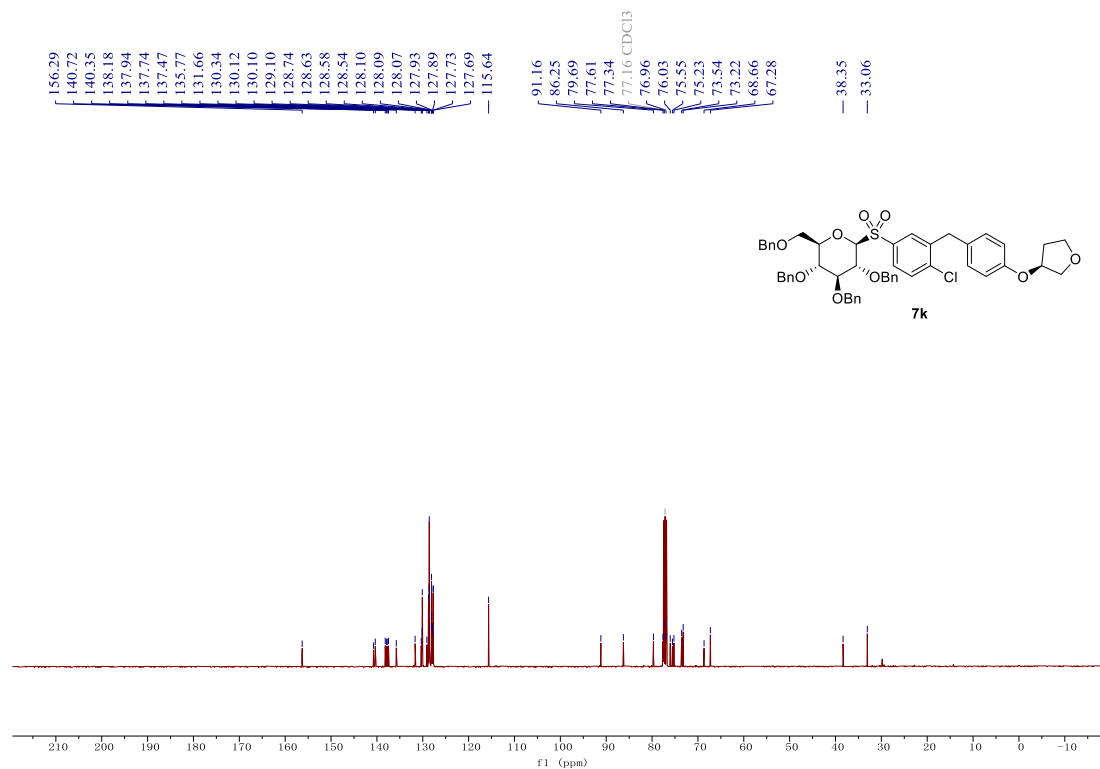

Figure S54. <sup>13</sup>C NMR (101 MHz, CDCl<sub>3</sub>) Spectra for compound 7k

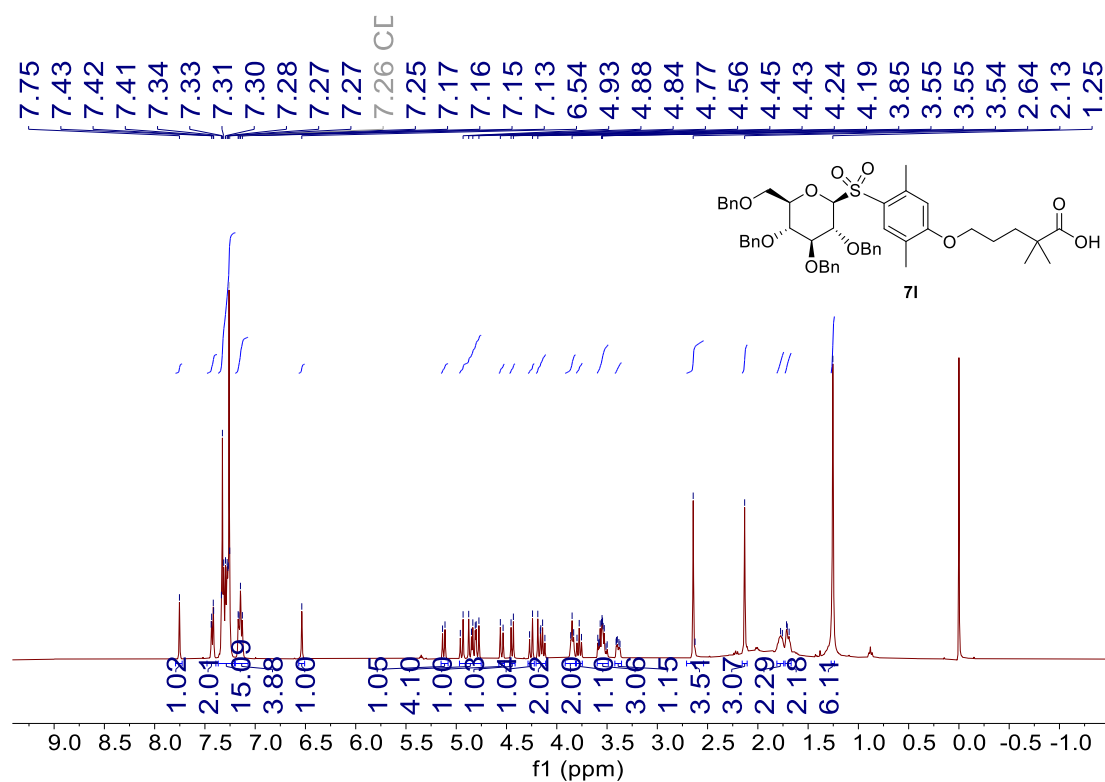

Figure S55. <sup>1</sup>H NMR (400 MHz, CDCl<sub>3</sub>) Spectra for compound 7l

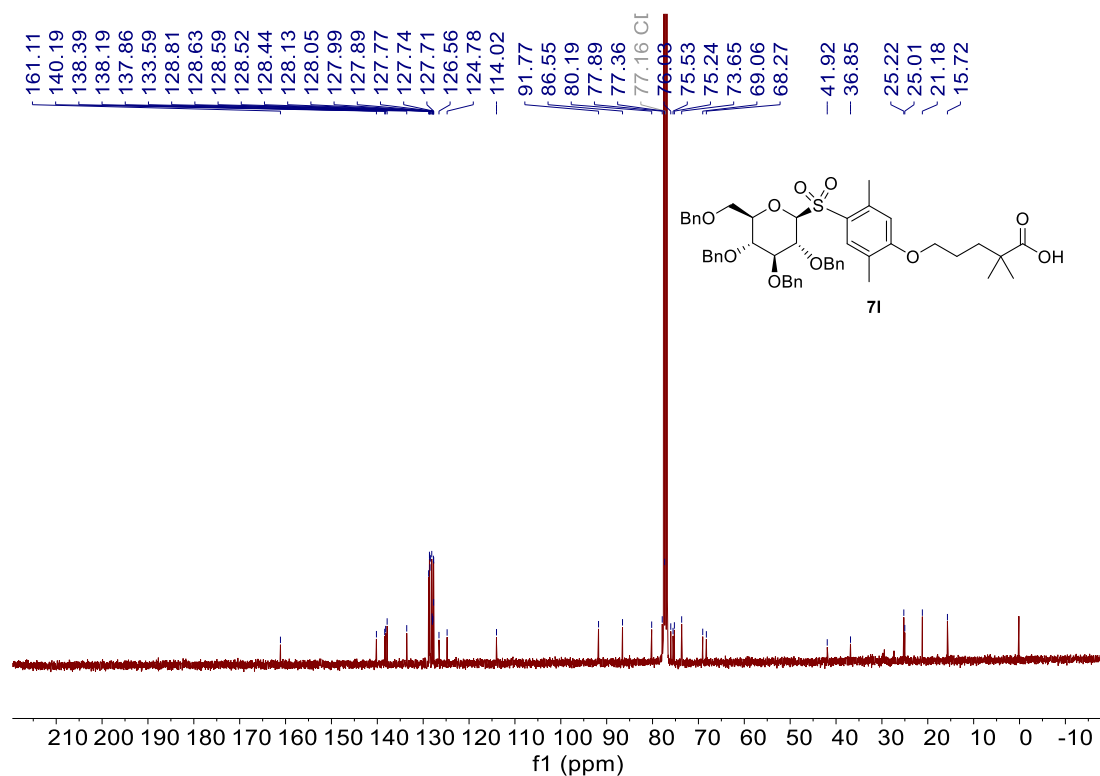

Figure S56.  $^{13}\text{C}$  NMR (101 MHz,  $\text{CDCl}_3$ ) Spectra for compound 71

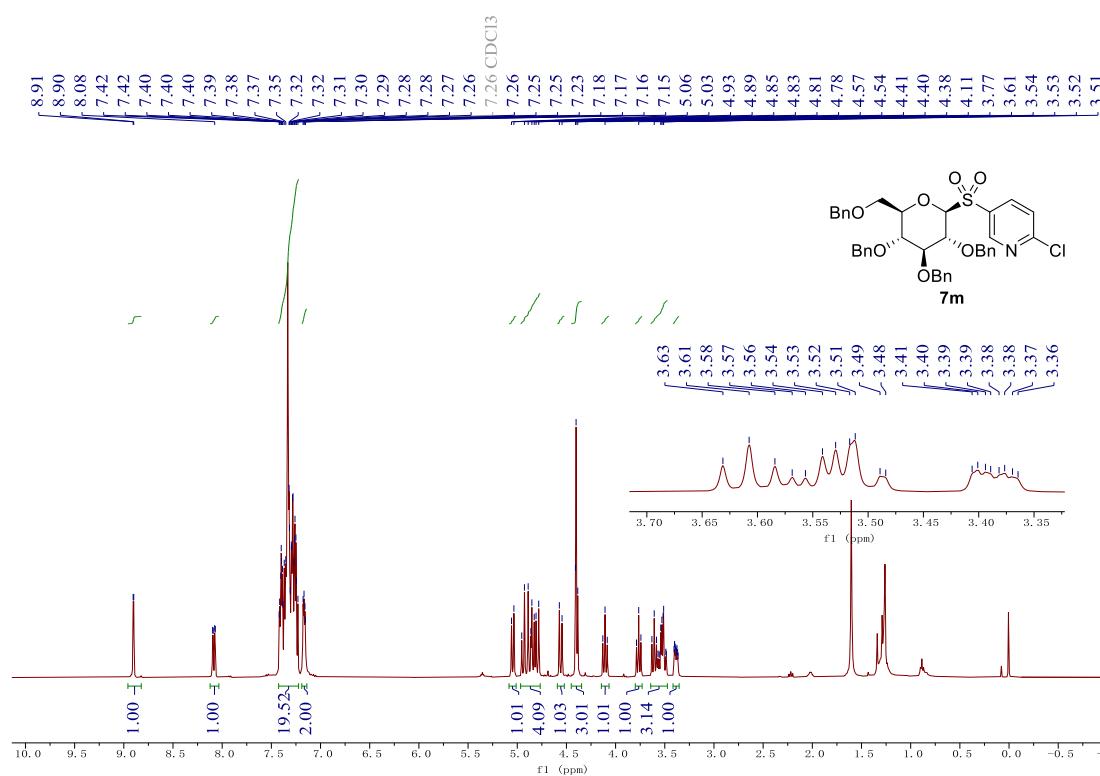

Figure S57.  $^1\text{H}$  NMR (400 MHz,  $\text{CDCl}_3$ ) Spectra for compound 7m

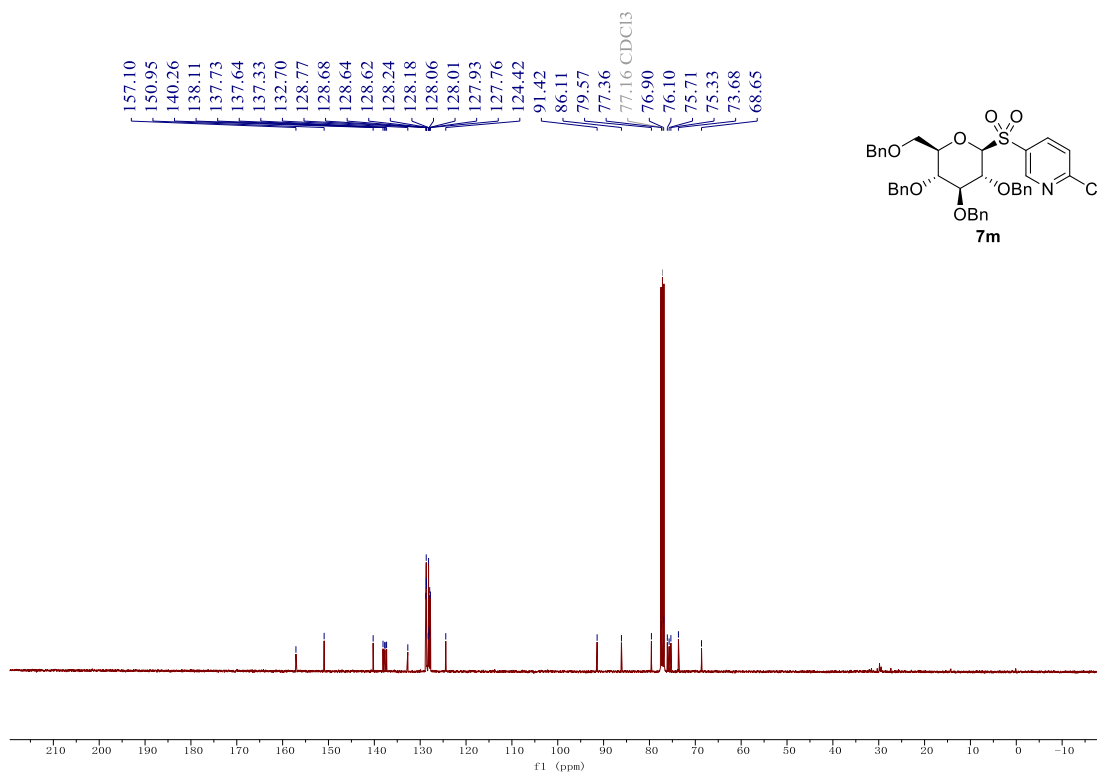

Figure S58. <sup>13</sup>C NMR (101 MHz, CDCl<sub>3</sub>) Spectra for compound 7m

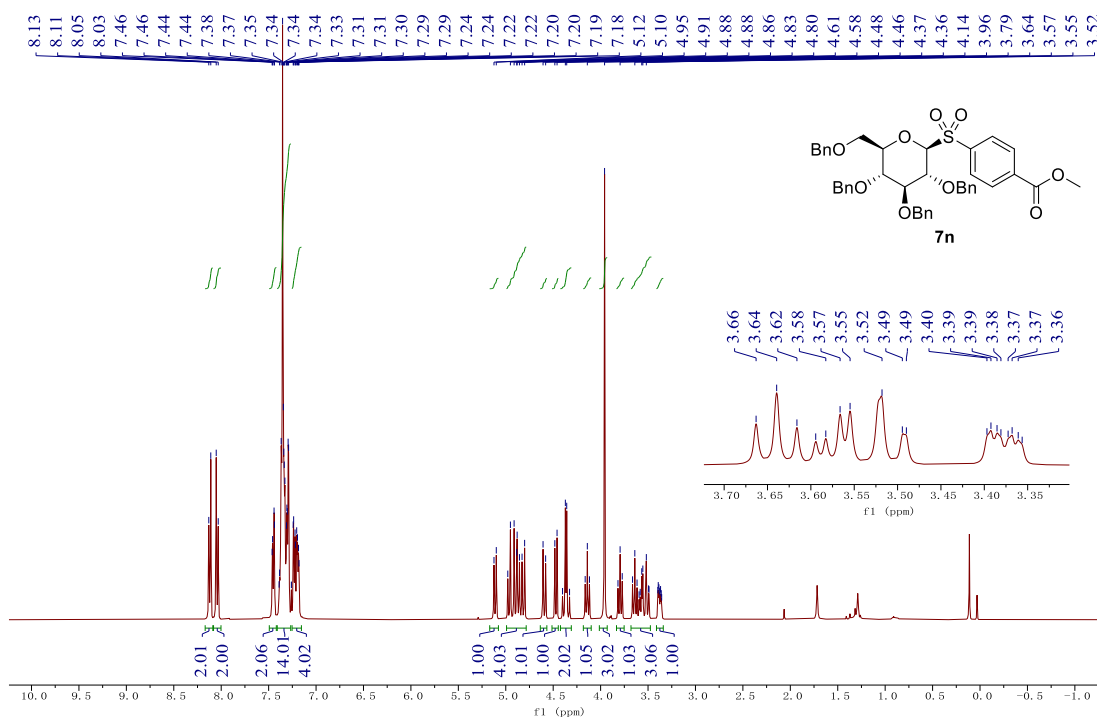

Figure S59. <sup>1</sup>H NMR (400 MHz, CDCl<sub>3</sub>) Spectra for compound 7n

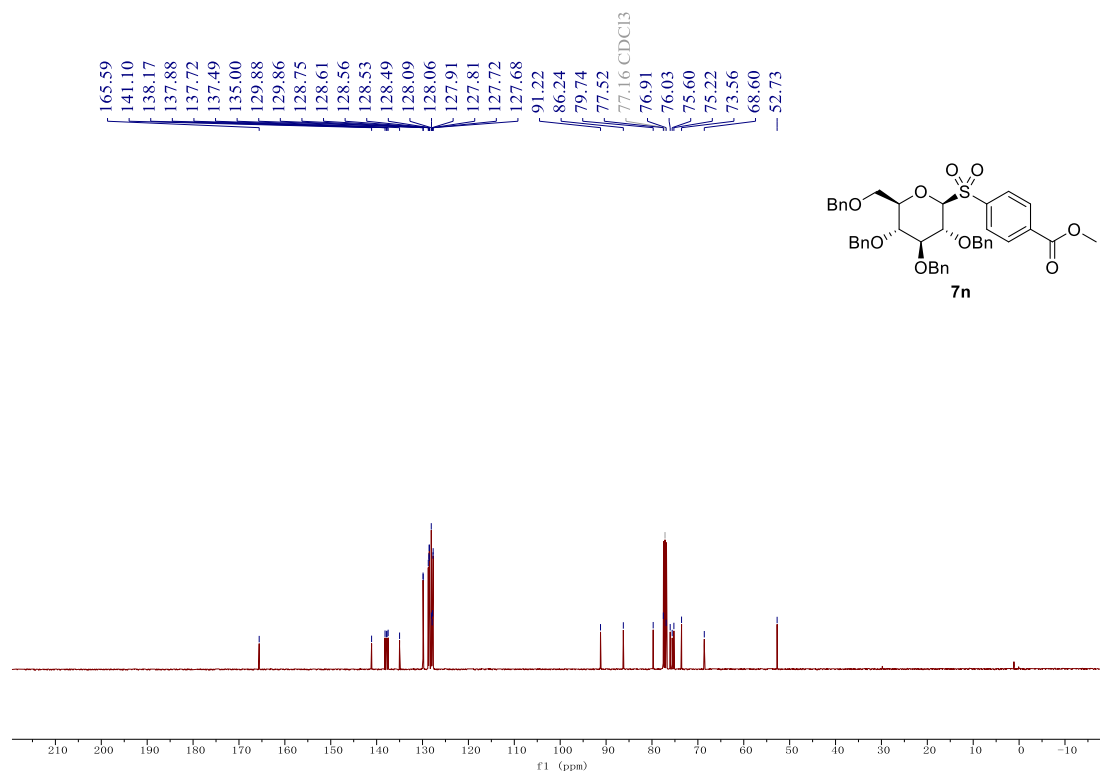

Figure S60. <sup>13</sup>C NMR (101 MHz, CDCl<sub>3</sub>) Spectra for compound **7n**

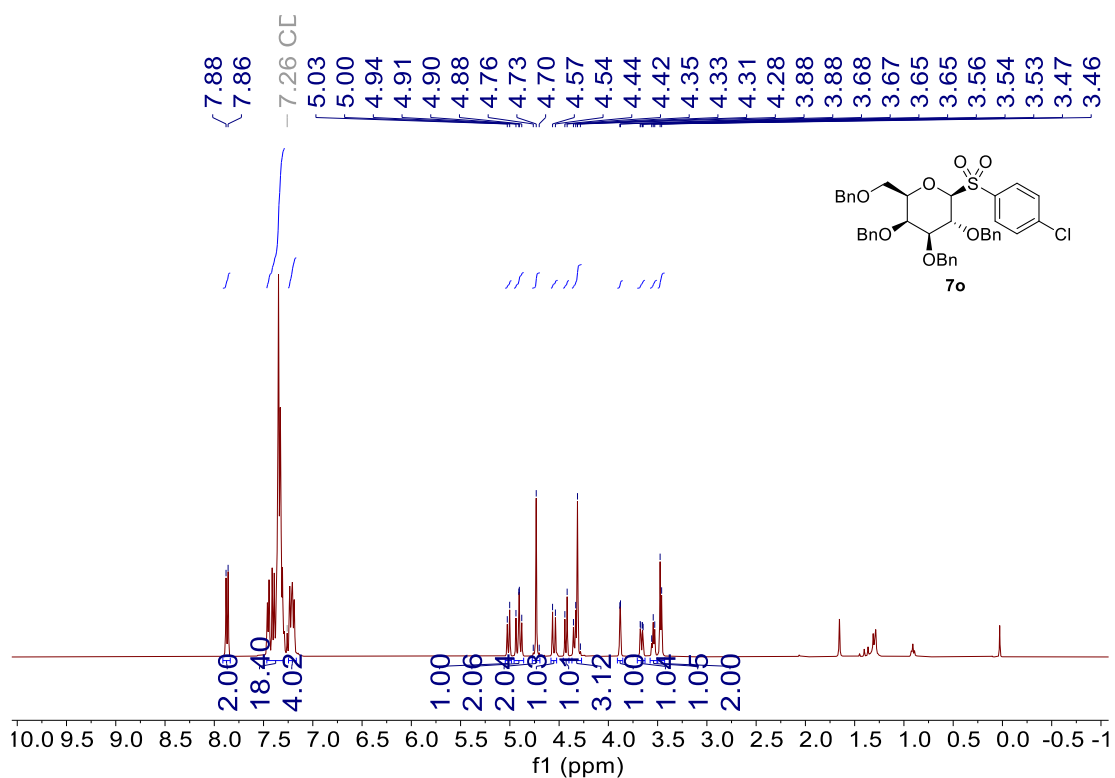

Figure S61. <sup>1</sup>H NMR (400 MHz, CDCl<sub>3</sub>) Spectra for compound **7o**

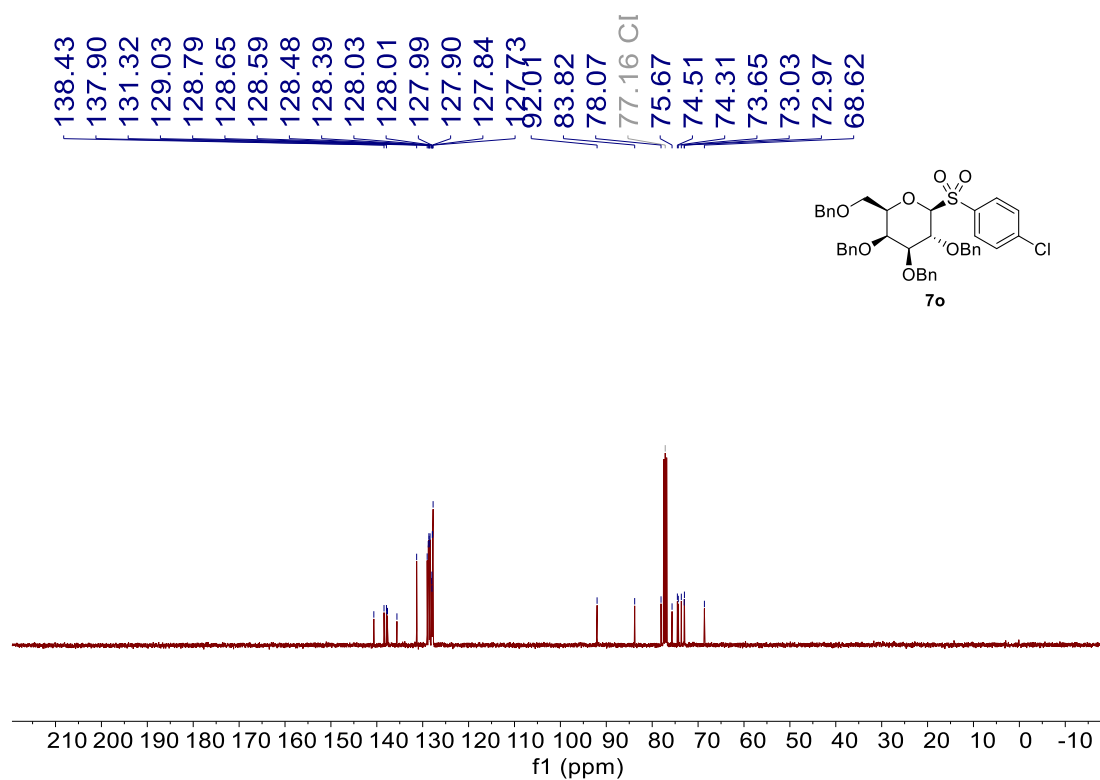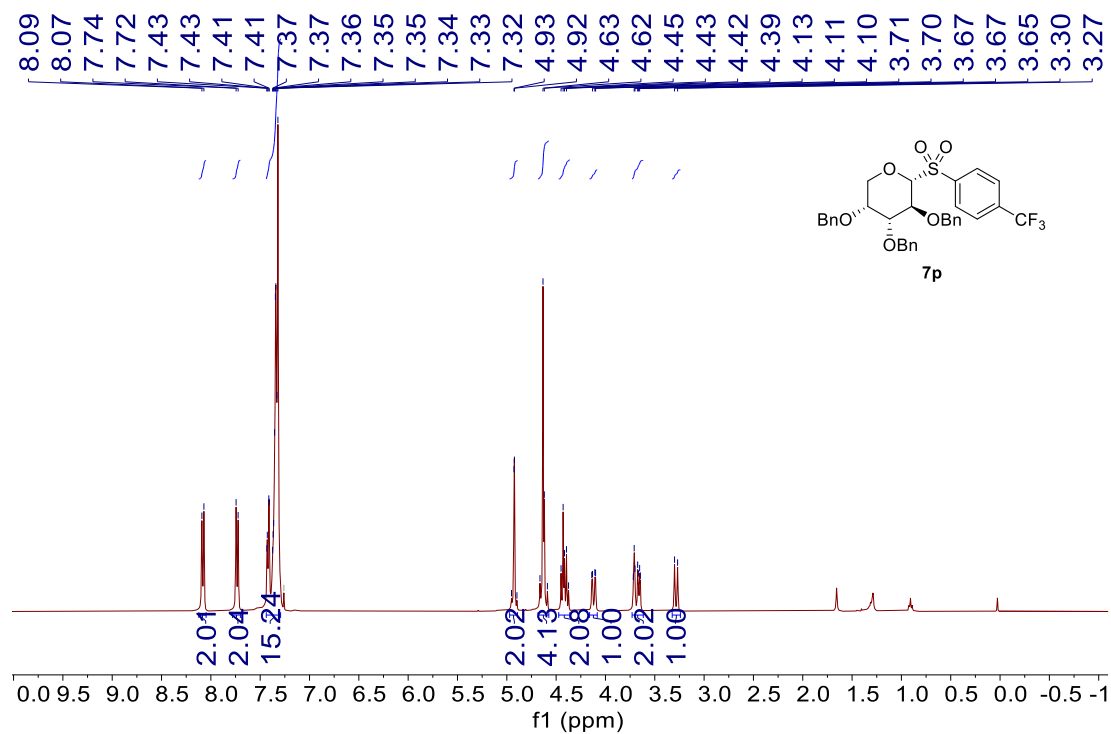

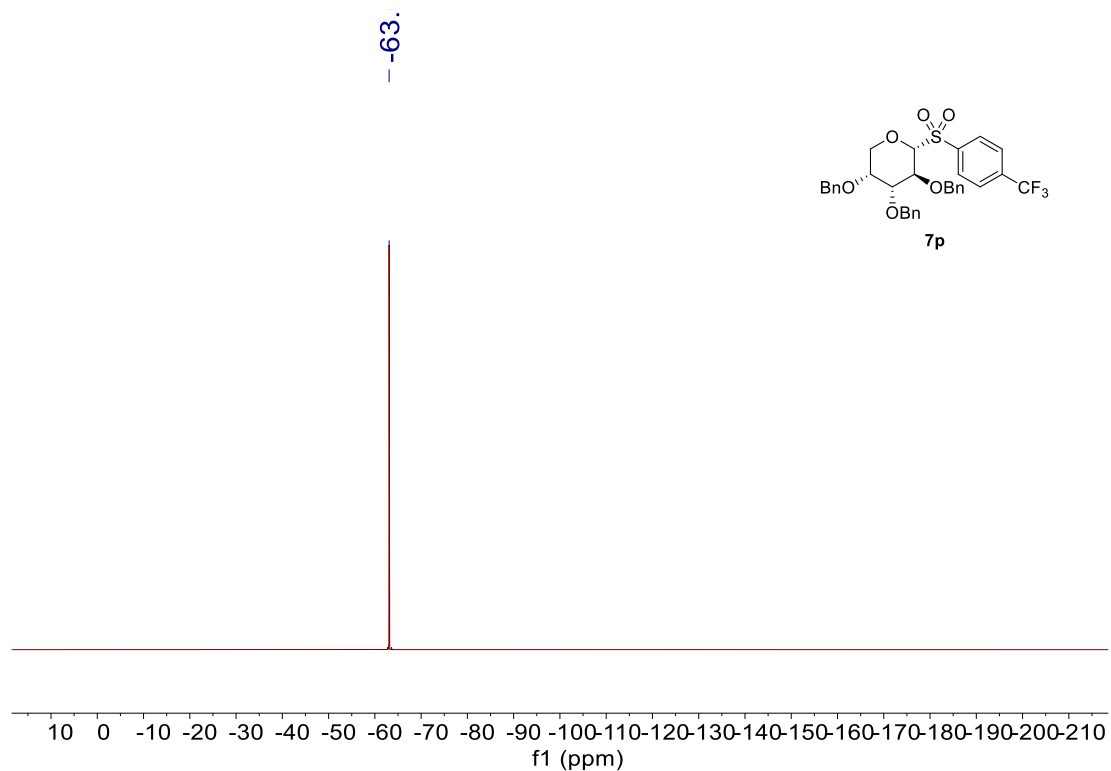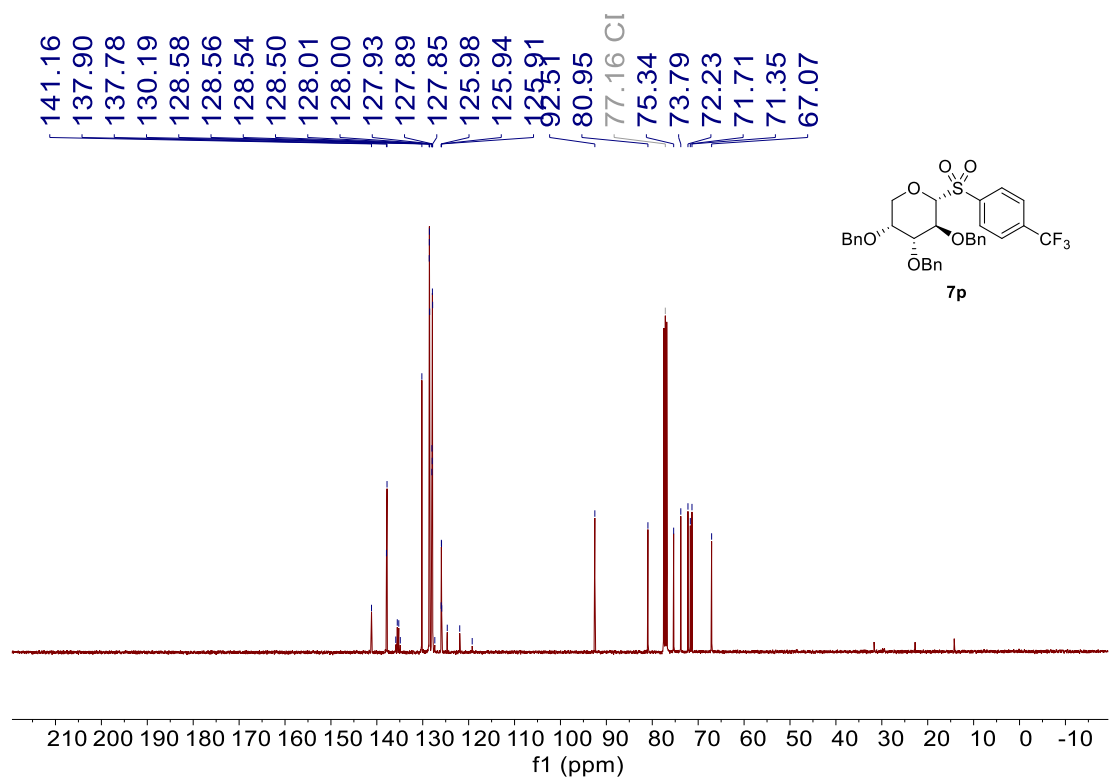

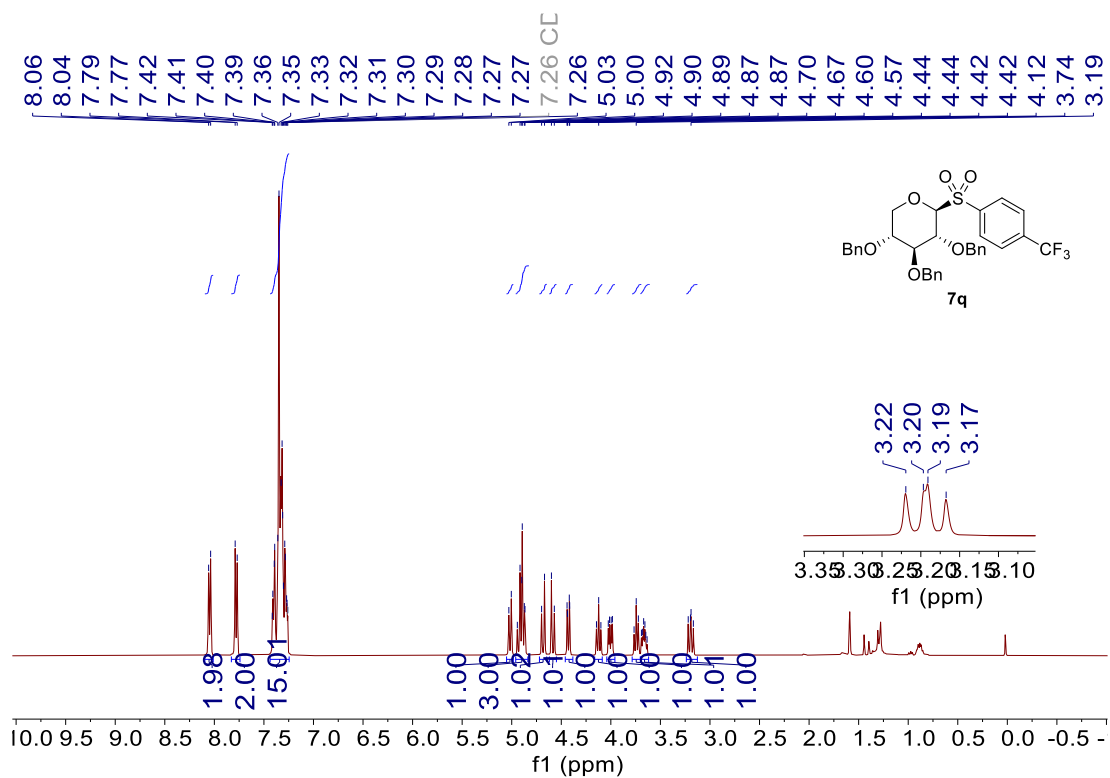

Figure S66.  $^1\text{H}$  NMR (400 MHz,  $\text{CDCl}_3$ ) Spectra for compound 7q

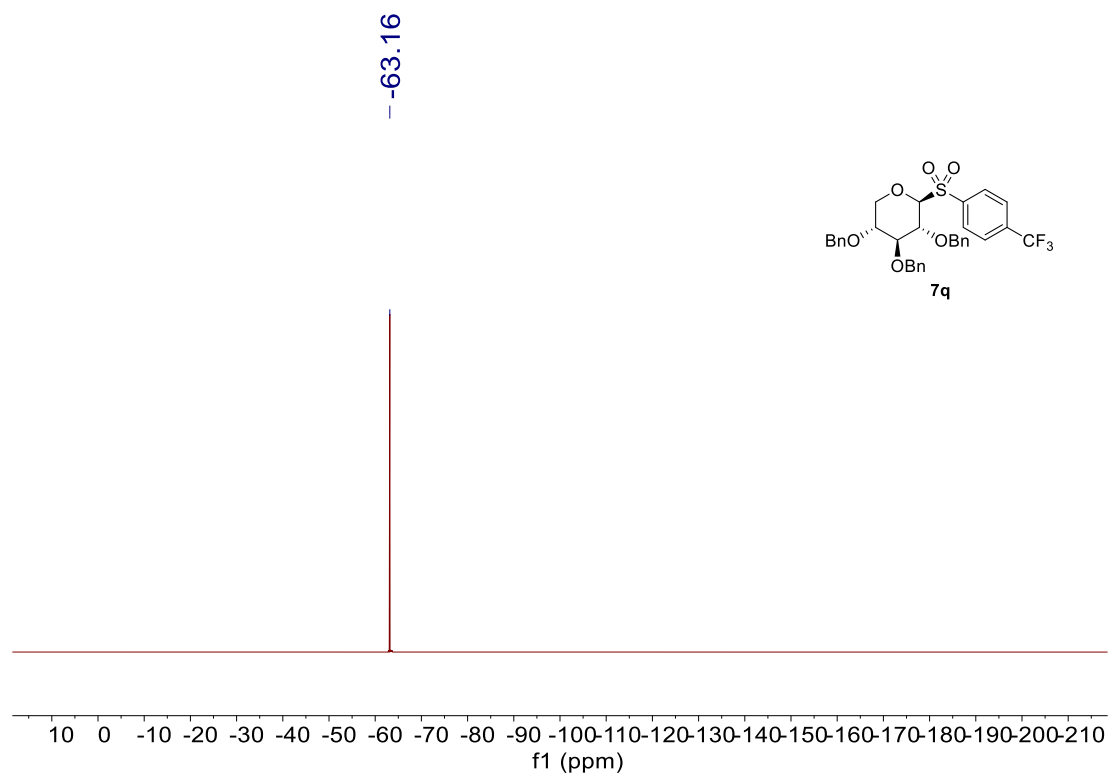

Figure S67.  $^{19}\text{F}$  NMR (376 MHz,  $\text{CDCl}_3$ ) Spectra for compound 7q

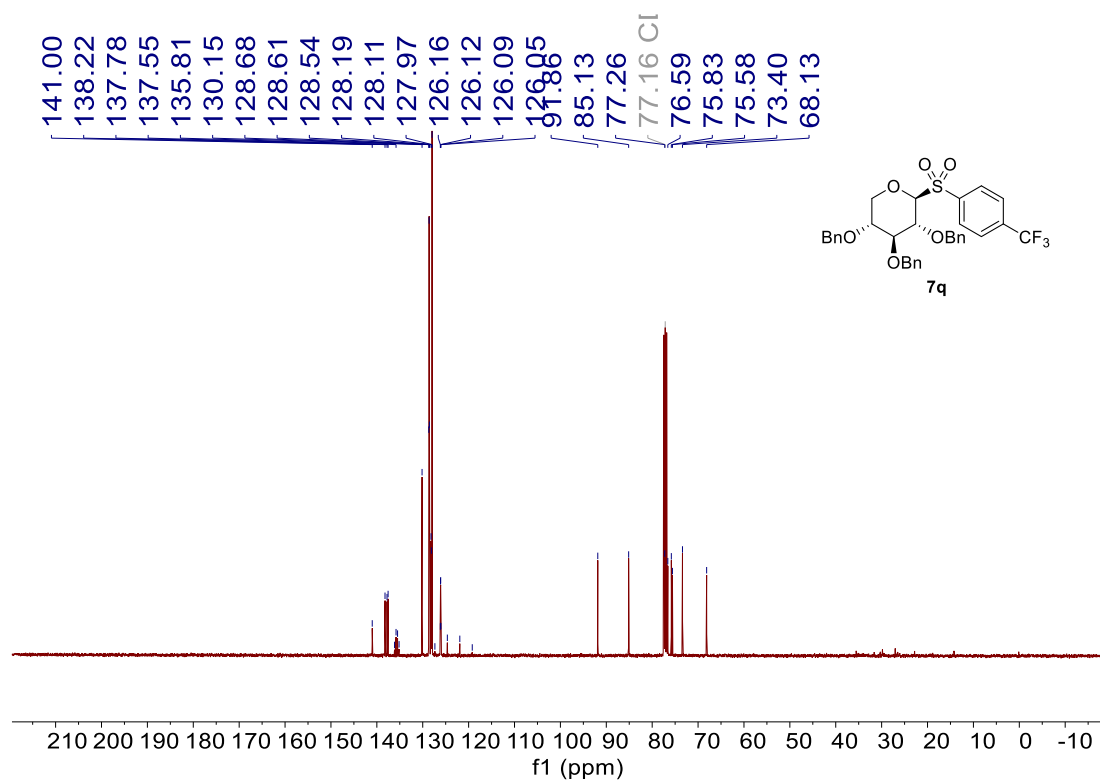

Figure S68. <sup>13</sup>C NMR (101 MHz, CDCl<sub>3</sub>) Spectra for compound 7q

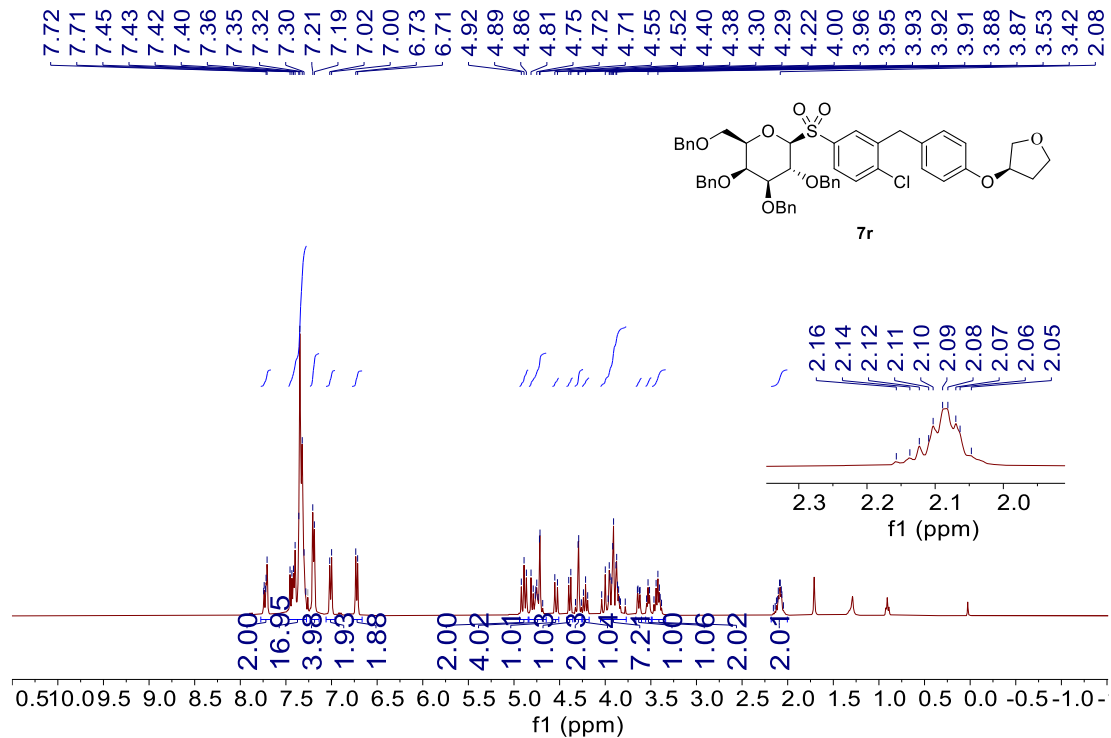

Figure S69. <sup>1</sup>H NMR (400 MHz, CDCl<sub>3</sub>) Spectra for compound 7r



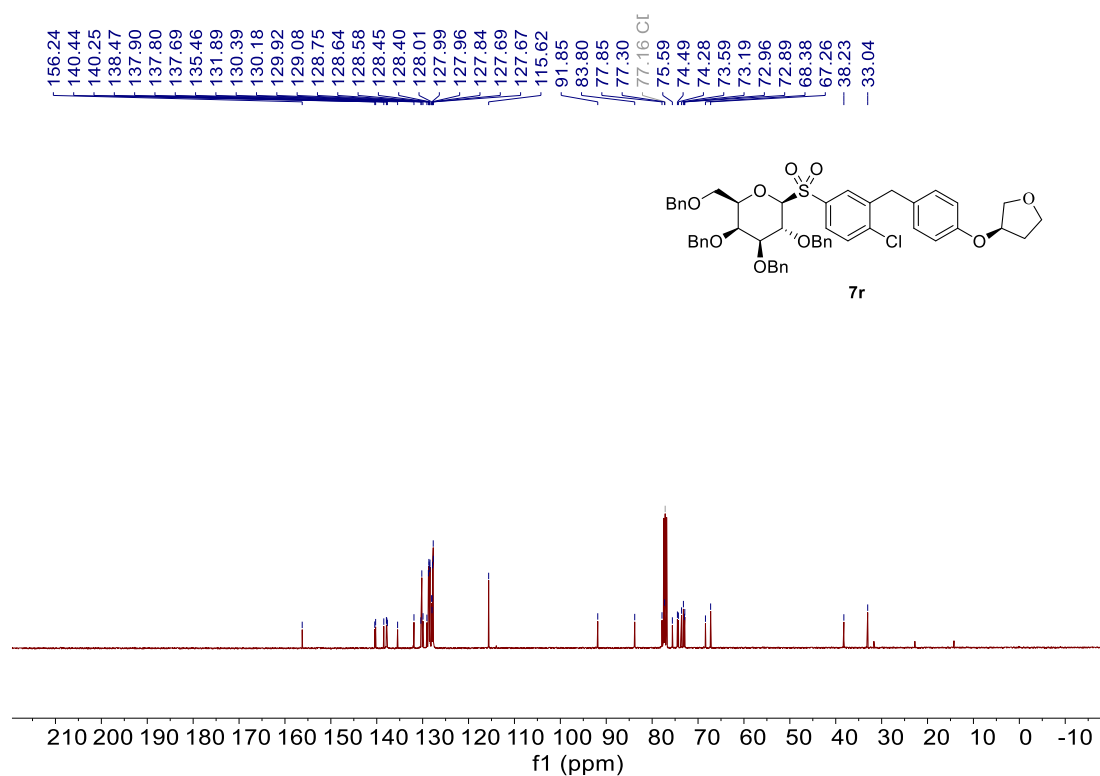

Figure S70.  $^{13}\text{C}$  NMR (101 MHz,  $\text{CDCl}_3$ ) Spectra for compound 7r

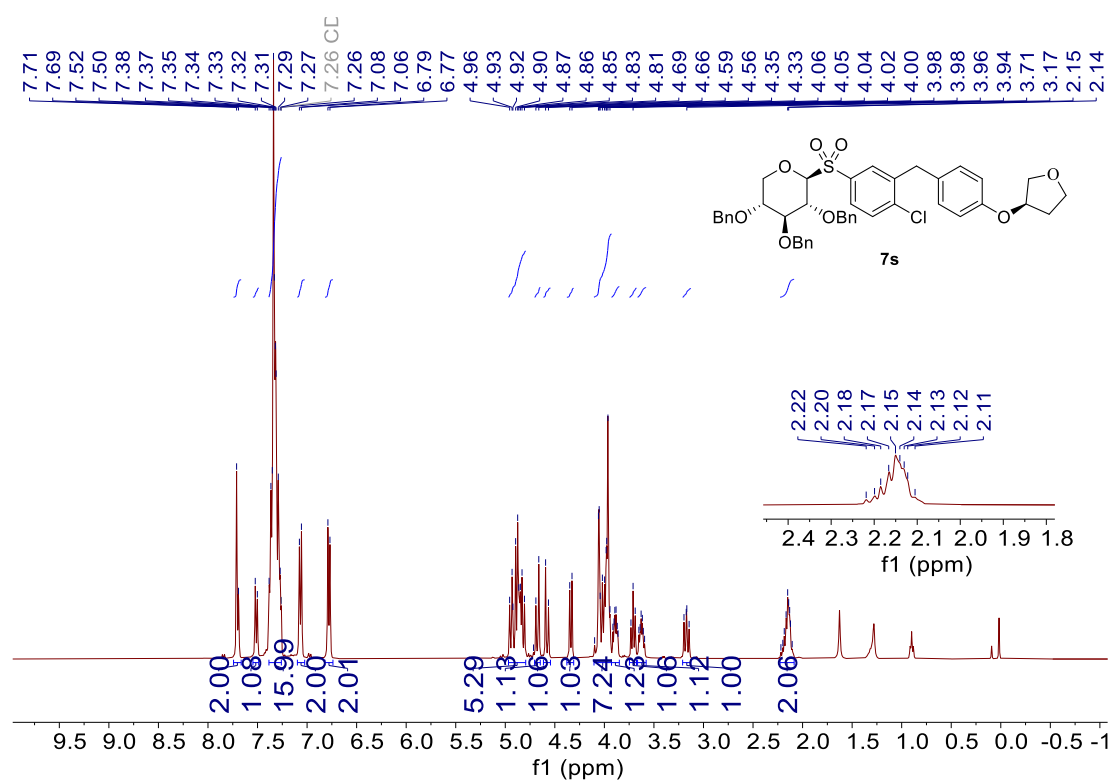

Figure S71.  $^1\text{H}$  NMR (400 MHz,  $\text{CDCl}_3$ ) Spectra for compound 7s

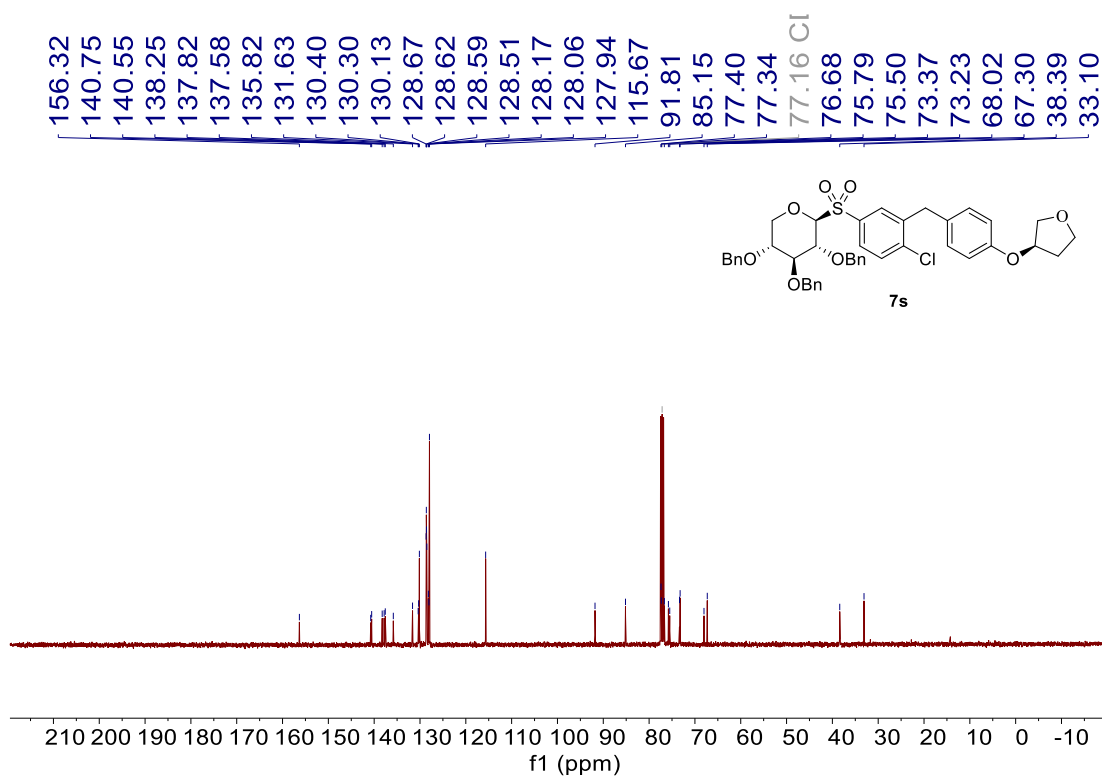

Figure S72.  $^{13}\text{C}$  NMR (101 MHz,  $\text{CDCl}_3$ ) Spectra for compound 7s

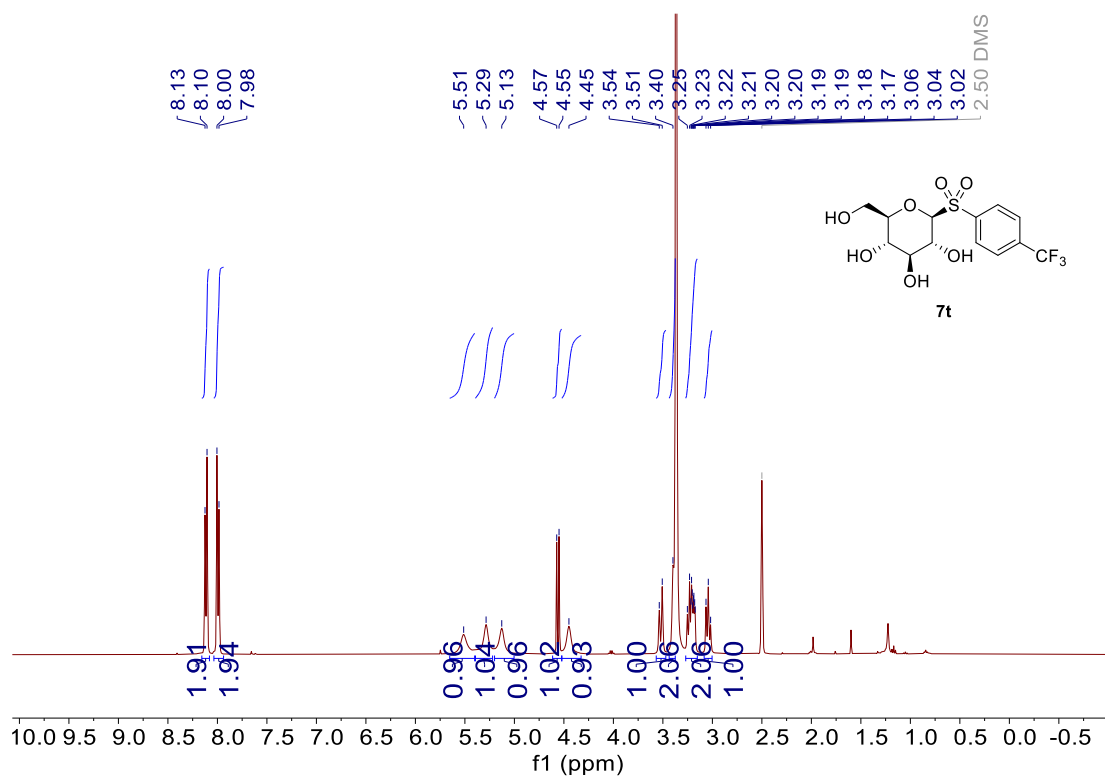

Figure S73.  $^1\text{H}$  NMR (400 MHz,  $\text{DMSO}-d_6$ ) Spectra for compound 7t

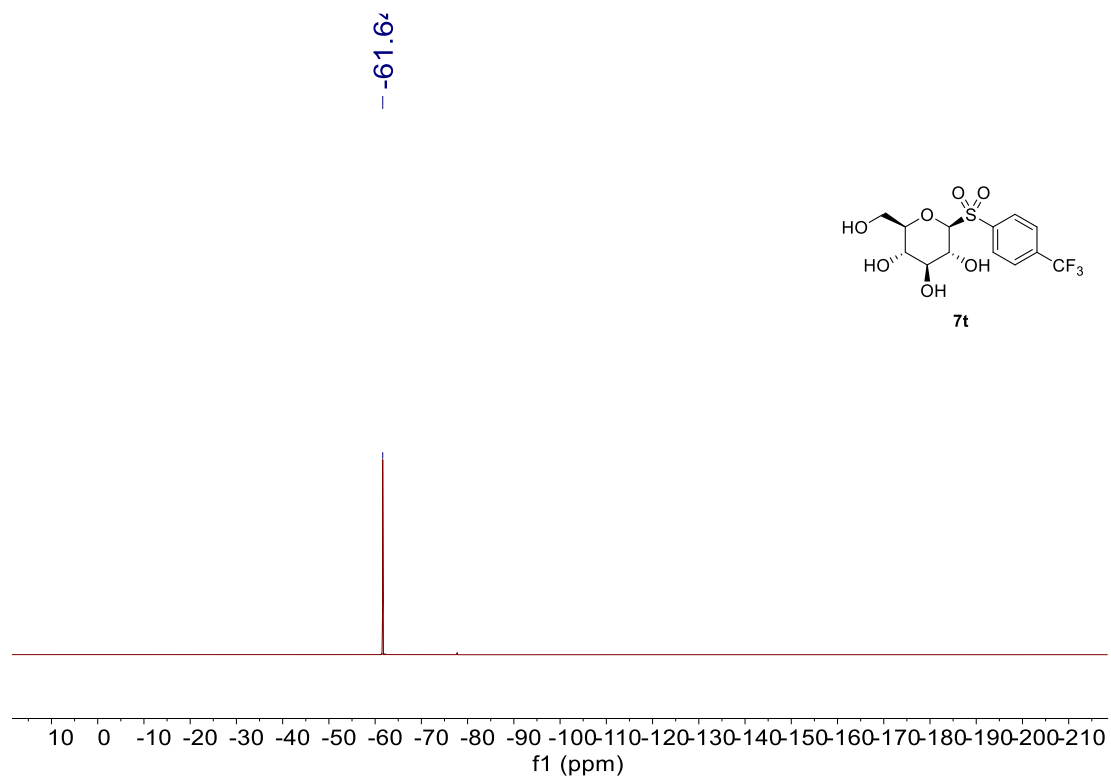

Figure S74.  $^{19}\text{F}$  NMR (376 MHz,  $\text{DMSO-}d_6$ ) Spectra for compound 7t

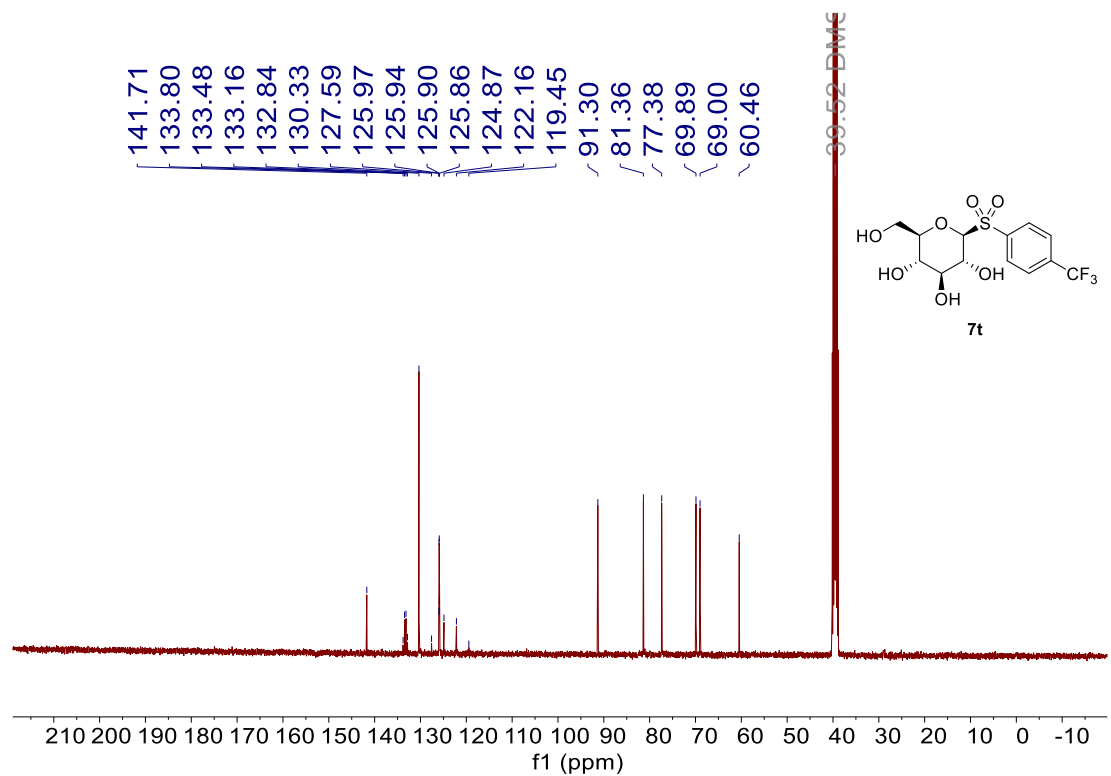

Figure S75.  $^{13}\text{C}$  NMR (101 MHz,  $\text{DMSO-}d_6$ ) Spectra for compound 7t

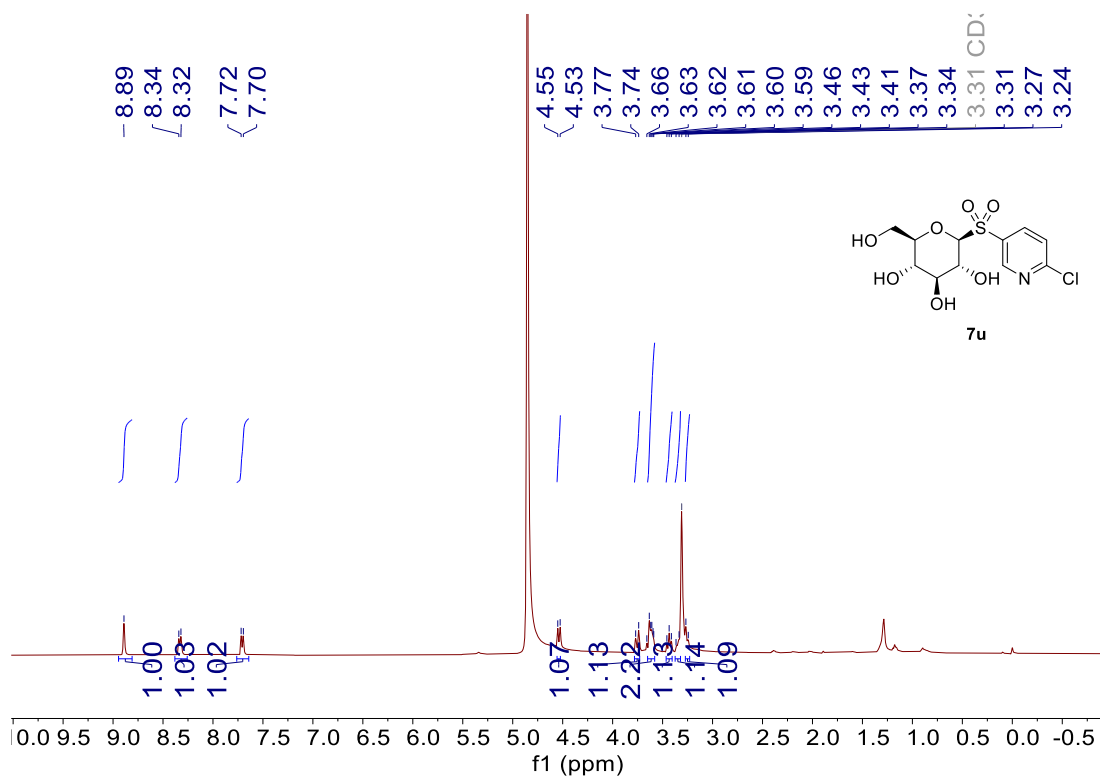

Figure S76. <sup>1</sup>H NMR (400 MHz, MeOD) Spectra for compound 7u

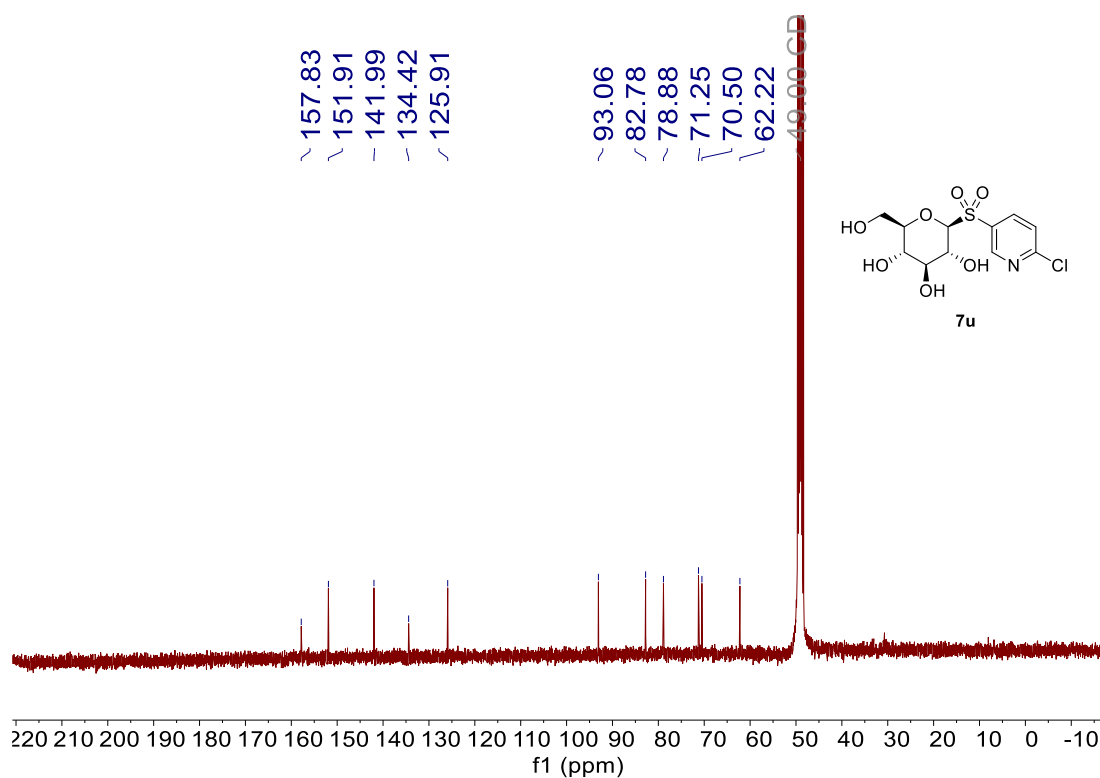

Figure S77. <sup>13</sup>C NMR (101 MHz, MeOD) Spectra for compound 7u

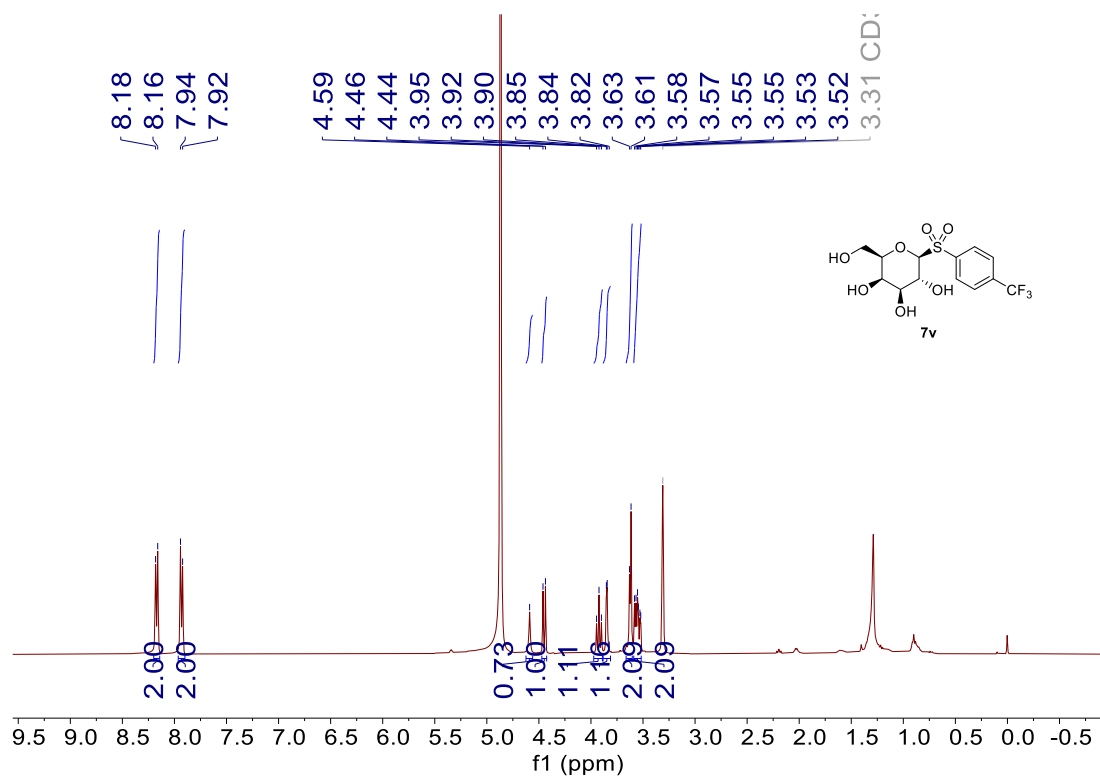

Figure S78. <sup>1</sup>H NMR (400 MHz, MeOD) Spectra for compound 7v

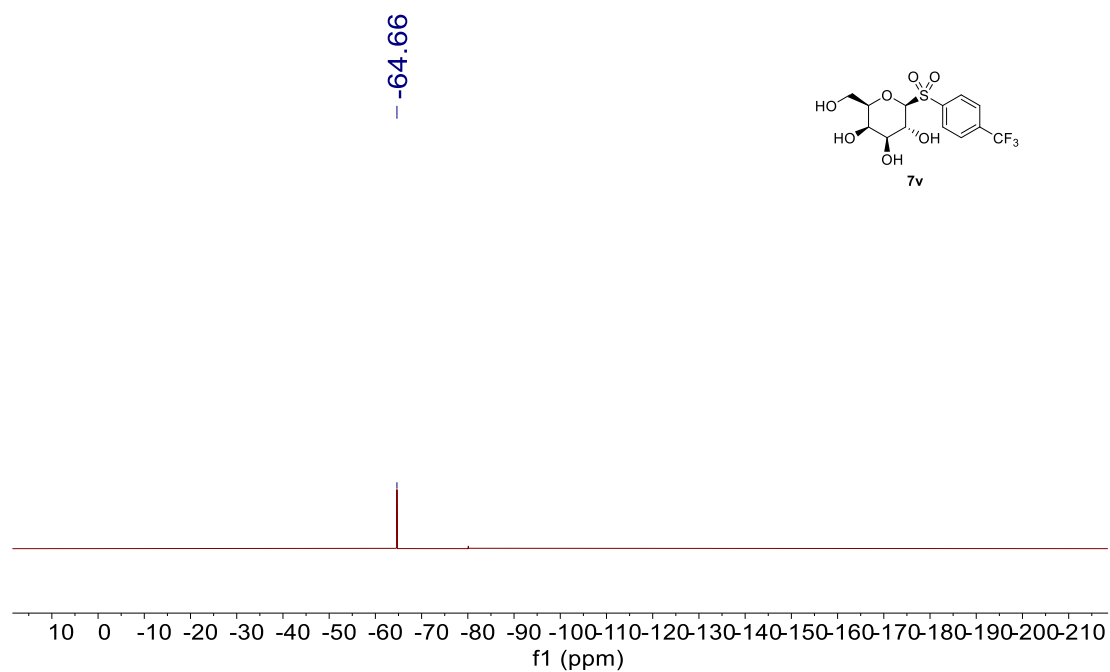

Figure S79. <sup>19</sup>F NMR (376 MHz, MeOD) Spectra for compound 7v

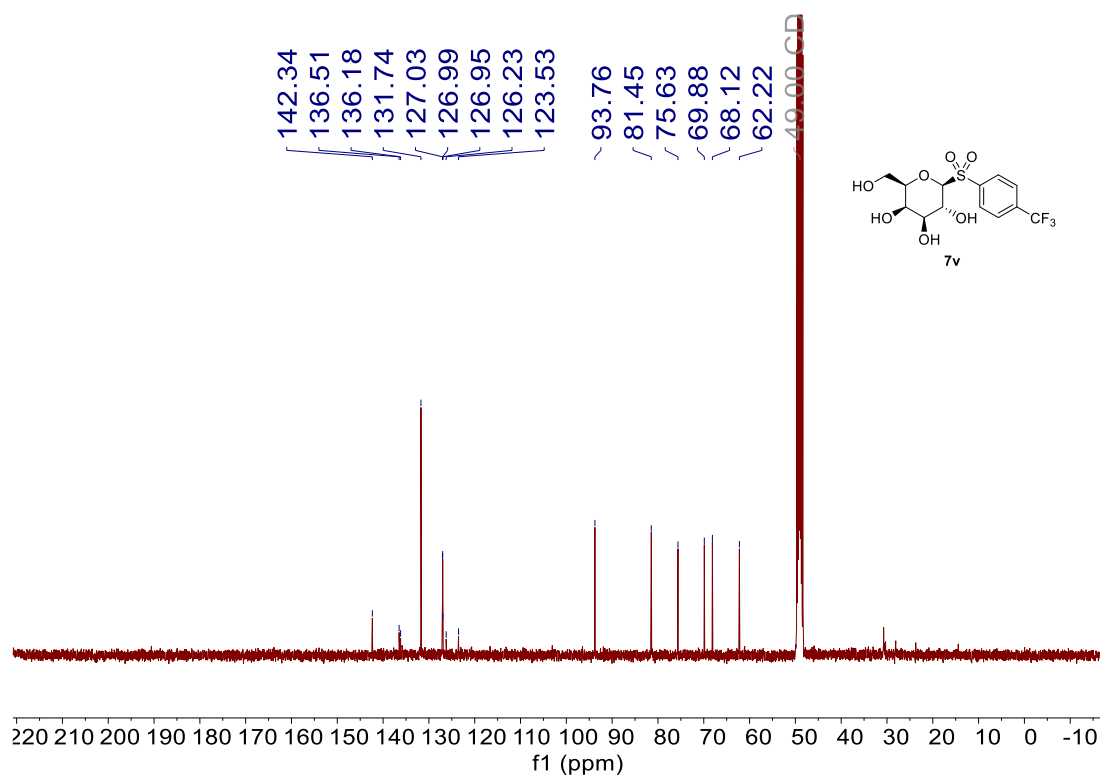

Figure S80. <sup>13</sup>C NMR (101 MHz, MeOD) Spectra for compound 7v

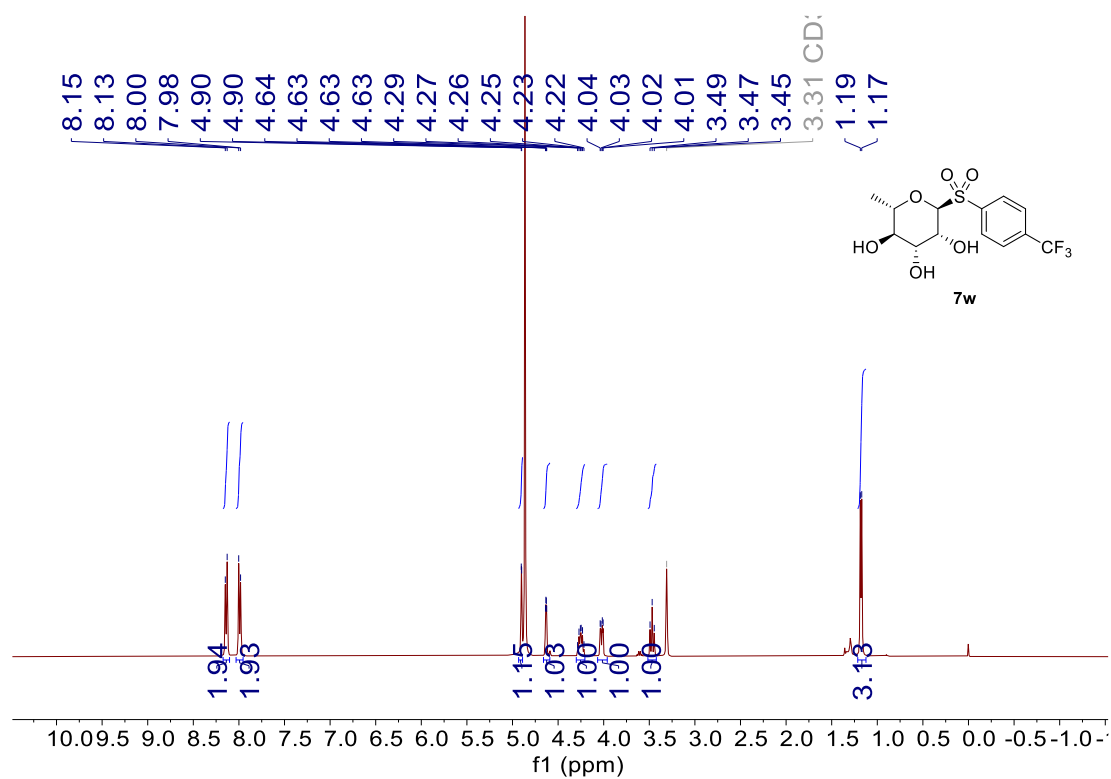

Figure S81. <sup>1</sup>H NMR (400 MHz, MeOD) Spectra for compound 7w

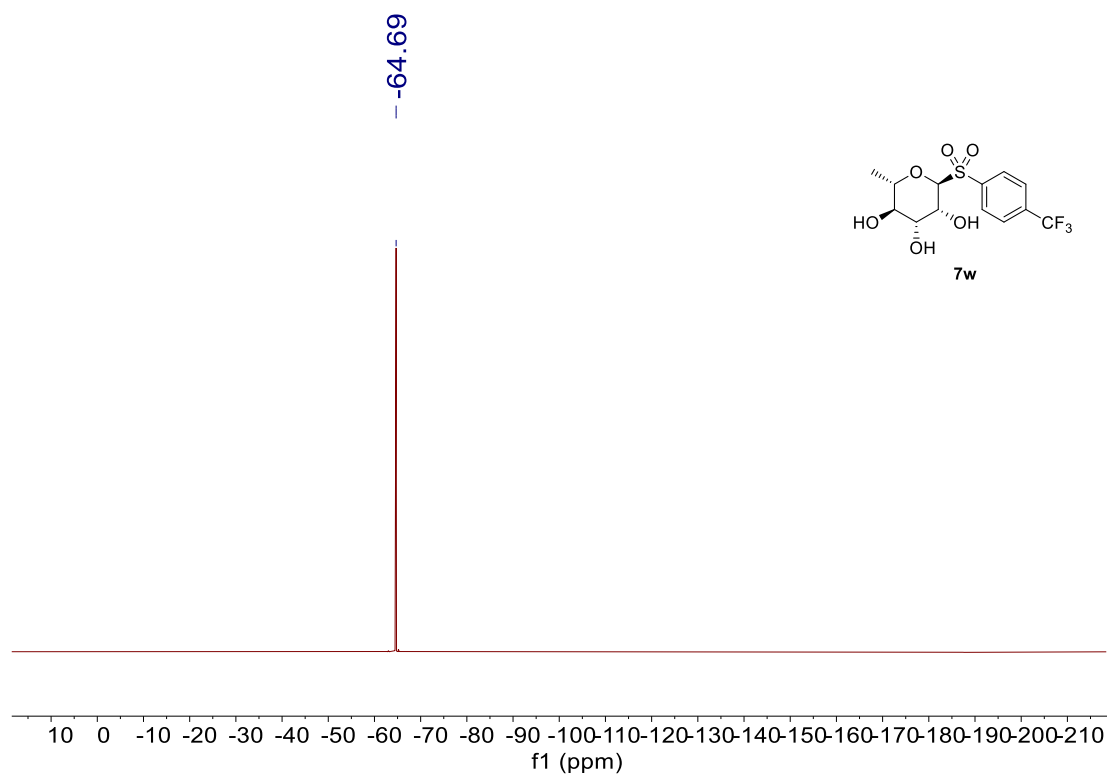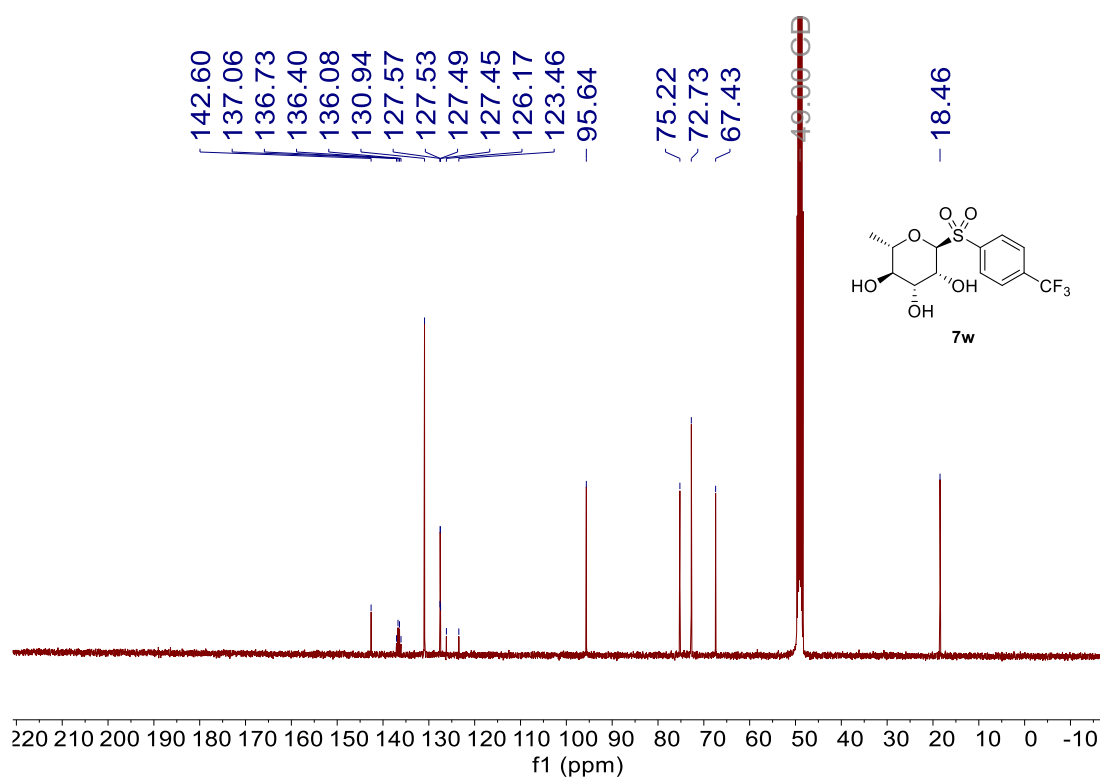

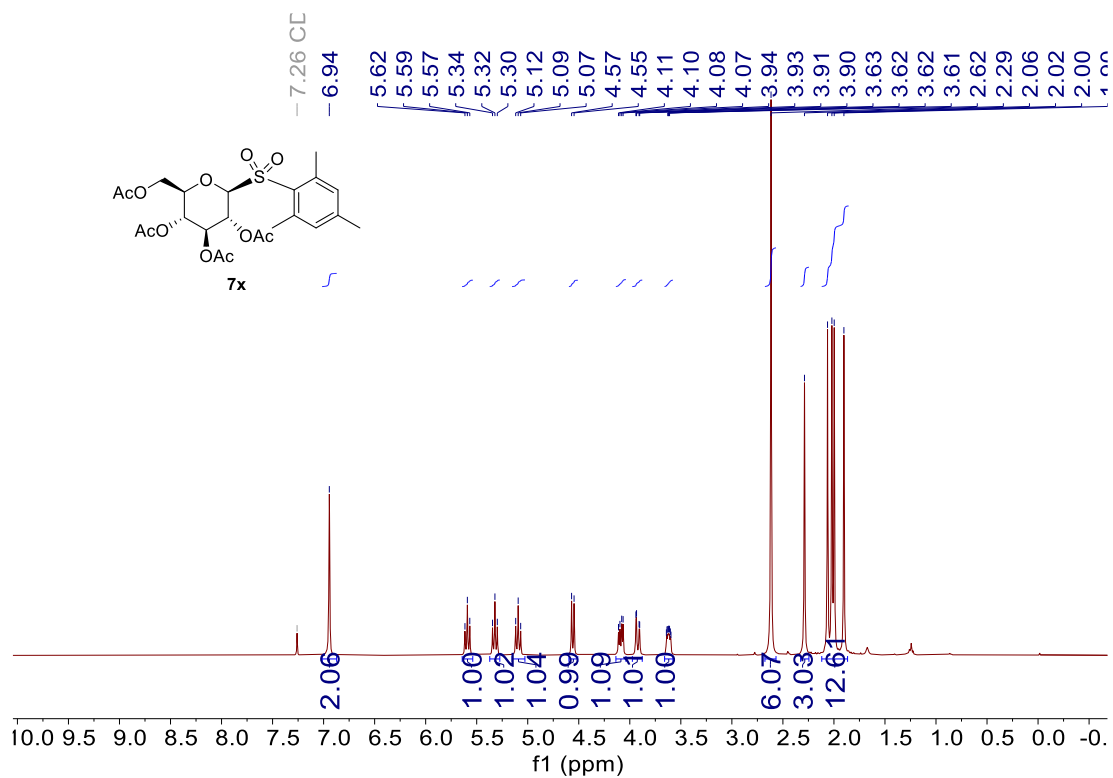

Figure S84 <sup>1</sup>H NMR (400 MHz, CDCl<sub>3</sub>) Spectra for compound 7x

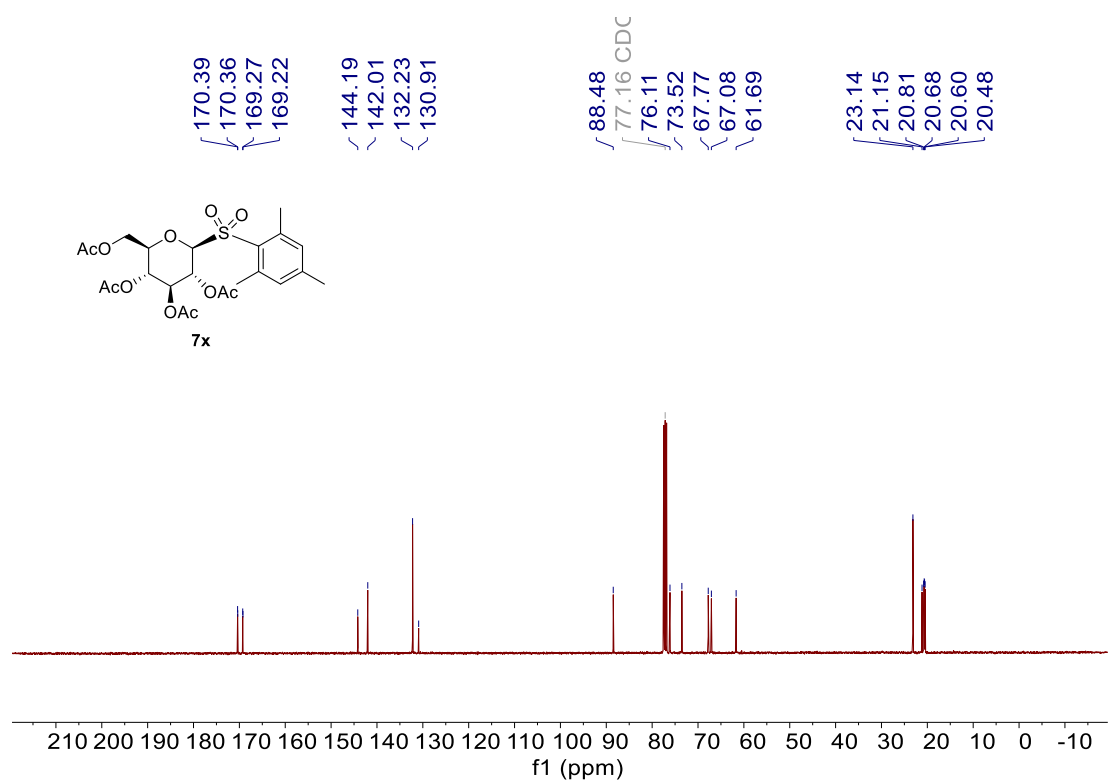

Figure S85. <sup>13</sup>C NMR (101 MHz, CDCl<sub>3</sub>) Spectra for compound 7x



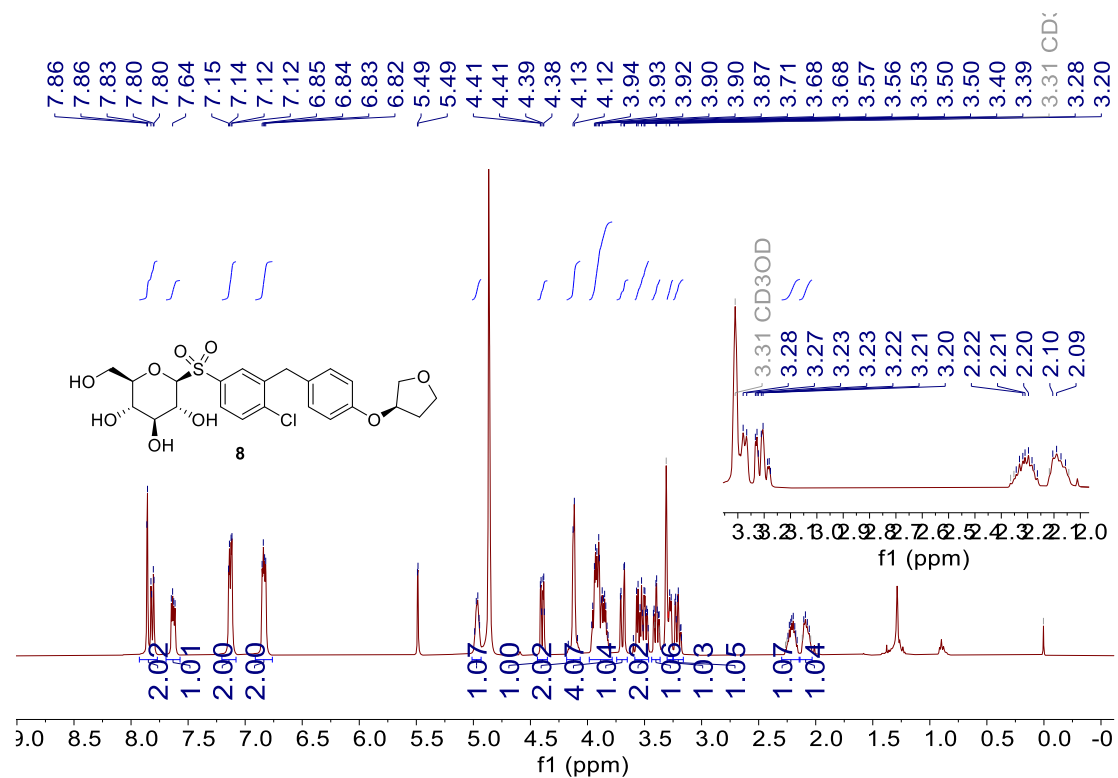

Figure S86. <sup>1</sup>H NMR (400 MHz, MeOD) Spectra for compound 8

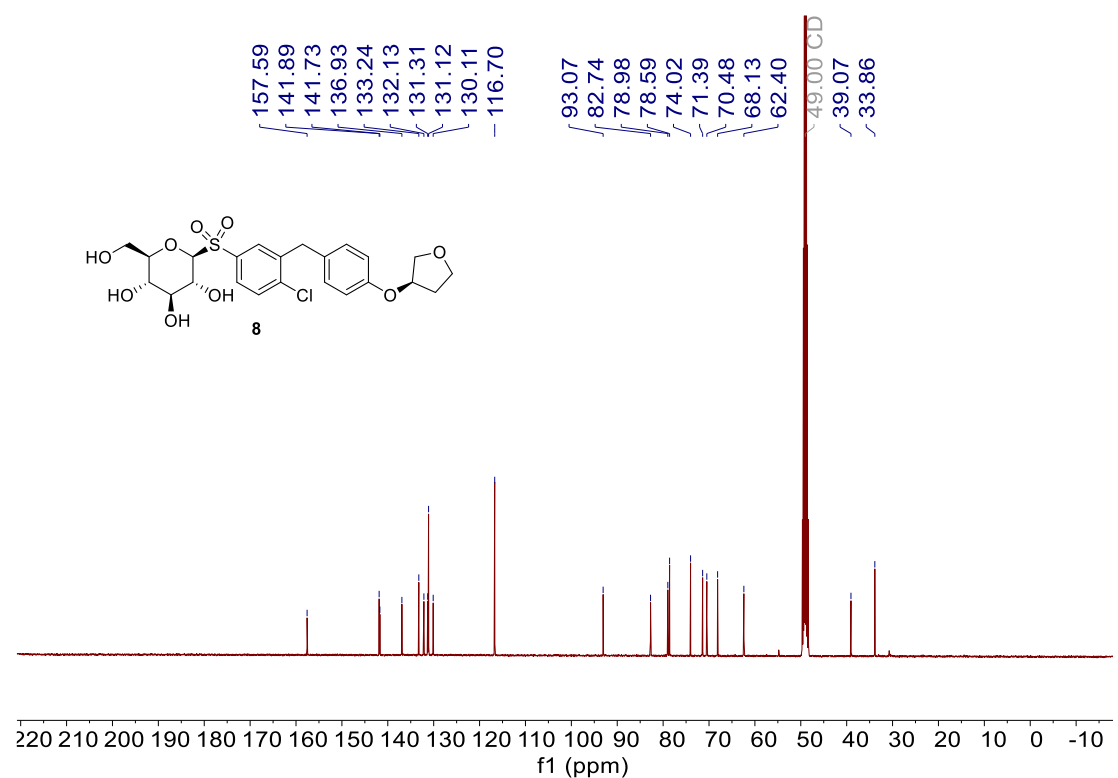

Figure S87. <sup>13</sup>C NMR (101 MHz, MeOD) Spectra for compound 8
